# 1 **Unidirectional and Bidirectional Causation between Smoking and Blood DNA** 2 **Methylation: Evidence from Twin-based Mendelian Randomisation**

3

4 Running head: **Causation between smoking and DNA methylation**

5

6 Madhurbain Singh<sup>1,2,3\*</sup>, Conor V. Dolan<sup>3,4,11</sup>, Dana M. Lapato<sup>1,2</sup>, Jouke-Jan Hottenga<sup>3,4</sup>, René  
7 Pool<sup>3,4</sup>, Brad Verhulst<sup>5</sup>, Dorret I. Boomsma<sup>3,4,12</sup>, Charles E. Breeze<sup>6,7</sup>, Eco J. C. de Geus<sup>3,4</sup>,  
8 Gibran Hemani<sup>8</sup>, Josine L. Min<sup>8</sup>, Roseann E. Peterson<sup>9,10,1</sup>, Hermine H. M. Maes<sup>1,2</sup>, Jenny van  
9 Dongen<sup>3,4,11\*</sup> and Michael C. Neale<sup>1,2,3,11\*</sup>

10

- 11 1. Virginia Institute for Psychiatric and Behavioral Genetics, Department of Psychiatry,  
12 Virginia Commonwealth University, Richmond, VA, USA
- 13 2. Department of Human and Molecular Genetics, Virginia Commonwealth University,  
14 Richmond, VA, USA
- 15 3. Department of Biological Psychology, Vrije Universiteit (VU) Amsterdam, Amsterdam,  
16 The Netherlands
- 17 4. Amsterdam Public Health Research Institute, Amsterdam, The Netherlands
- 18 5. Department of Psychiatry and Behavioral Sciences, Texas A&M University, College  
19 Station, TX, USA
- 20 6. Division of Cancer Epidemiology and Genetics, National Cancer Institute, National  
21 Institutes of Health, Department Health and Human Services, Bethesda, MD, USA
- 22 7. UCL Cancer Institute, University College London, London, UK.
- 23 8. MRC Integrative Epidemiology Unit, University of Bristol, Bristol, UK
- 24 9. Department of Psychiatry and Behavioral Sciences, SUNY Downstate Health Sciences  
25 University, Brooklyn, NY, USA
- 26 10. Institute for Genomics in Health, SUNY Downstate Health Sciences University,  
27 Brooklyn, NY, USA
- 28
- 29 11. These authors jointly supervised this work.
- 30 12. Current address: Department of Complex Trait Genetics, Center for Neurogenomics and  
31 Cognitive Research, Vrije Universiteit (VU) Amsterdam, Amsterdam, The Netherlands

32

33 \*Corresponding authors:

34 Madhurbain Singh. Email: [singhm18@vcu.edu](mailto:singhm18@vcu.edu). Address: Virginia Institute for Psychiatric and  
35 Behavioral Genetics, 800 E. Leigh St., Suite 100, Richmond, VA 23298, USA

36 Jenny van Dongen. Email: [j.van.dongen@vu.nl](mailto:j.van.dongen@vu.nl). Address: Department of Biological Psychology,  
37 Vrije Universiteit Amsterdam, van der Boechorststraat 7, 1081 BT Amsterdam, The Netherlands

38 Michael C. Neale. Email: [michael.neale@vcuhealth.org](mailto:michael.neale@vcuhealth.org). Address: Virginia Institute for  
39 Psychiatric and Behavioral Genetics, 800 E. Leigh St., Suite 100, Richmond, VA 23298, USA

40

## 41 **ORCID**

42 Madhurbain Singh: 0000-0002-9396-2860  
43 Conor V. Dolan: 0000-0002-2496-8492  
44 Dana M. Lapato: 0000-0001-8169-9754  
45 Jouke-Jan Hottenga: 0000-0002-5668-2368  
46 René Pool: 0000-0001-5579-0933  
47 Brad Verhulst: 0000-0001-5369-9757  
48 Dorret I. Boomsma: 0000-0002-7099-7972  
49 Charles E. Breeze: 0000-0002-5294-915X  
50 Eco J. C. de Geus: 0000-0001-6022-2666  
51 Gibran Hemani: 0000-0003-0920-1055  
52 Josine L. Min: 0000-0003-4456-9824  
53 Roseann E. Peterson: 0000-0001-6402-849X  
54 Hermine H. M. Maes: 0000-0001-7489-2214  
55 Jenny van Dongen: 0000-0003-2063-8741  
56 Michael C. Neale: 0000-0003-4887-659X

## 57 **Funding**

58 We acknowledge funding from the U.S. National Institute on Drug Abuse grant R01DA049867,  
59 the Netherlands Organization for Scientific Research (NWO): Biobanking and Biomolecular  
60 Research Infrastructure (BBMRI-NL, NWO 184.033.111) and the BBRMI-NL-financed BIOS  
61 Consortium (NWO 184.021.007), NWO Large Scale infrastructures X-Omics (184.034.019),  
62 Genotype/phenotype database for behaviour genetic and genetic epidemiological studies  
63 (ZonMw Middelgroot 911-09-032); Netherlands Twin Registry Repository: researching the  
64 interplay between genome and environment (NWO-Groot 480-15-001/674); the Avera Institute,  
65 Sioux Falls (USA), and the U.S. National Institutes of Health (NIH R01HD042157-01A1,  
66 R01MH081802, R01MH125938, and Grand Opportunity grants 1RC2 MH089951 and 1RC2  
67 MH089995). DML is supported by the NIH K01MH131847. DIB acknowledges the Royal  
68 Netherlands Academy of Science Professor Award (PAH/6635). JLM and GH are supported by  
69 the UK Medical Research Council (MRC) Integrative Epidemiology Unit at the University of  
70 Bristol (MC\_UU\_00011/1, MC\_UU\_00011/5).

## 71 **Acknowledgements**

72 NTR warmly thanks all participants. Epigenetic data were generated at the Human Genomics  
73 Facility (HuGe-F) at ErasmusMC Rotterdam (<http://www.glimdna.org/>) as part of the Biobank-  
74 based Integrative Omics Study Consortium. We thank Dr. Scott Vrieze (University of  
75 Minnesota) for providing the leave-one-out GWAS summary statistics from the GWAS &  
76 Sequencing Consortium of Alcohol and Nicotine Use (GSCAN).

77 **Conflicts of Interest**

78 Nothing to declare.

79 **Data Availability**

80 Data from the Netherlands Twin Register (NTR) may be accessed for research purposes by  
81 submitting a data-sharing request. Further information about NTR data access is available at  
82 <https://ntr-data-request.psy.vu.nl/>.

83 Results of all MR-DoC models fitted in this study are available as Supplementary Data on OSF  
84 (doi:10.17605/OSF.IO/R6HVY).

85 **Code Availability**

86 The code used in the analyses for this study is available at: [https://github.com/singh-](https://github.com/singh-madhur/MRDOC_Smoking_DNA_m_NTR)  
87 [madhur/MRDOC\\_Smoking\\_DNA\\_m\\_NTR](https://github.com/singh-madhur/MRDOC_Smoking_DNA_m_NTR).

88

89

## Abstract

90 Cigarette smoking is associated with numerous differentially-methylated genomic loci in  
91 multiple human tissues. These associations are often assumed to reflect the causal effects of  
92 smoking on DNA methylation (DNAm), which may underpin some of the adverse health  
93 sequelae of smoking. However, prior causal analyses with Mendelian Randomisation (MR) have  
94 found limited support for such effects. Here, we apply an integrated approach combining MR  
95 with twin causal models to examine causality between smoking and blood DNAm in the  
96 Netherlands Twin Register (N=2577). Analyses revealed potential causal effects of current  
97 smoking on DNAm at >500 sites in/near genes enriched for functional pathways relevant to  
98 known biological effects of smoking (e.g., hemopoiesis, cell- and neuro-development, and  
99 immune regulation). Notably, we also found evidence of reverse and bidirectional causation at  
100 several DNAm sites, suggesting that variation in DNAm at these sites may influence smoking  
101 liability. Seventeen of the loci with putative effects of DNAm on smoking showed highly  
102 specific enrichment for gene-regulatory functional elements in the brain, while the top three sites  
103 annotated to genes involved in G protein-coupled receptor signalling and innate immune  
104 response. These novel findings are partly attributable to the analyses of *current* smoking in twin  
105 models, rather than *lifetime* smoking typically examined in MR studies, as well as the increased  
106 statistical power achieved using multiallelic/polygenic scores as instrumental variables while  
107 controlling for potential horizontal pleiotropy. This study highlights the value of twin studies  
108 with genotypic and DNAm data for investigating causal relationships of DNAm with health and  
109 disease.

110

### 111 **Keywords**

112 Smoking, DNA Methylation, Causal inference, Twin modelling, Mendelian Randomisation,  
113 Epigenetics

114

115  
116  
117  
118  
119  
120  
121  
122  
123  
124  
125  
126  
127  
128  
129  
130  
131  
132  
133  
134  
135  
136  
137  
138  
139  
140  
141  
142  
143  
144  
145  
146  
147  
148  
149  
150  
151

## Introduction

Epigenome-wide association studies (EWASs) identify variation in DNA methylation (DNAm) associated with complex human traits and diseases [1]. Arguably, the most successful EWASs have been studies of cigarette smoking. A large-scale EWAS meta-analysis of current versus never smoking revealed significant DNAm differences at 18,760 CpG (*Cytosine-phosphate-Guanine*) sites in peripheral blood cells [2]. DNAm differences between former- and never-smoking individuals were diminished but remained significant at 2,568 sites. Genes annotated to the differentially methylated CpGs have been implicated in genome-wide association studies (GWAS) of numerous smoking-associated traits, including cancers, lung functions, cardiovascular disorders, inflammatory disorders, and schizophrenia [2].

As standard cross-sectional EWAS in unrelated individuals cannot differentiate between causation and confounding [3], different etiological mechanisms may underlie the associations between cigarette smoking and DNAm. These associations are typically interpreted as the causal *effects* of smoking exposure on DNAm. However, some smoking-associated CpGs may have reverse or bidirectional causal links with smoking, i.e., DNAm may reciprocally affect the development and maintenance of smoking behaviours [4]. Moreover, associations between smoking and DNAm may be attributable to confounders, such as schizophrenia [5], alcohol [6] and cannabis use [7] and body mass index [8].

Mendelian Randomisation (MR) analyses use genetic variants as instrumental variables (IVs) to estimate causal effects [3,9]. MR analyses have identified the effects of lifetime (current or former) smoking on blood DNAm at only 11 CpGs [10], with reverse effects of blood DNAm at nine sites [11]. Causal inference in MR is based on the assumption that the genetic variants associated with the exposure influence the outcome exclusively through the exposure.

Specifically, genetic IVs for smoking may show vertical, but not horizontal, pleiotropy with DNAm. To minimise the risk of horizontal pleiotropy, MR analyses require carefully selected single-nucleotide polymorphisms (SNPs), including using genetic colocalisation to filter out SNPs showing horizontal pleiotropy due to linkage disequilibrium (LD). Since SNPs usually have small effect sizes, traditional MR approaches may have limited power to detect causality and may be subject to weak-instrument bias [12]. Furthermore, causal inference in standard, summary-statistics-based MR analyses typically applies to the GWAS phenotype of *lifetime* smoking. However, as most smoking-associated DNAm changes exhibit substantial reversibility upon smoking cessation [2,13], it is important to examine the causal relationships of *current* smoking specifically.

152 Recent methodological developments integrate the principles of MR with the twin-based  
153 *Direction of Causation* (DOC) model [14], giving rise to the unidirectional *MR-DoC1* [15] and  
154 the bidirectional *MR-DoC2* models [16]. MR-DoC1 allows one to estimate and account for  
155 horizontal pleiotropy, while MR-DoC2 accommodates pleiotropy arising from LD. Thus, these  
156 models enable using polygenic risk scores (PRS) as IVs, increasing the statistical power to  
157 estimate causal effects and curtailing weak-instrument bias, relative to MR methods using  
158 individual SNPs as IVs. Incorporating MR with family data also helps to resolve additional  
159 assumptions of standard MR, such as random mating and no dyadic effects [15,17]. Moreover,  
160 by using participant-level information, these models estimate causal effects between the  
161 phenotypes measured in the twins, allowing separate causal models for current and former  
162 smoking.

163  
164 The present study used MR-DoC models to examine bidirectional causal effects between  
165 cigarette smoking and peripheral blood DNAm in a population-based cohort of European  
166 ancestry adult twins from the Netherlands Twin Register (NTR) [18,19]. The target sample  
167 included 2,577 individuals from 1,459 twin pairs with both genotypic and DNAm data, and self-  
168 reported smoking status at the time of blood draw. Across 16,940 smoking-related CpGs, we  
169 fitted separate models for current (versus never) and former (versus never) smoking. We  
170 obtained a set of three causal estimates in each direction (*Smoking*  $\rightarrow$  *DNAm*, *DNAm*  $\rightarrow$   
171 *Smoking*): the estimates from bidirectional MR-DoC2, and two different model specifications of  
172 unidirectional MR-DoC1 (**Figure 1**). We triangulated evidence across the three models based on  
173 the statistical significance and consistency of the causal estimates. The results indicated much  
174 more widespread putative causal influences of current smoking on DNAm than *vice versa*.  
175 Follow-up enrichment analyses highlighted biological processes and tissues relevant to the CpGs  
176 with potential effects in either direction of causation.

177

178

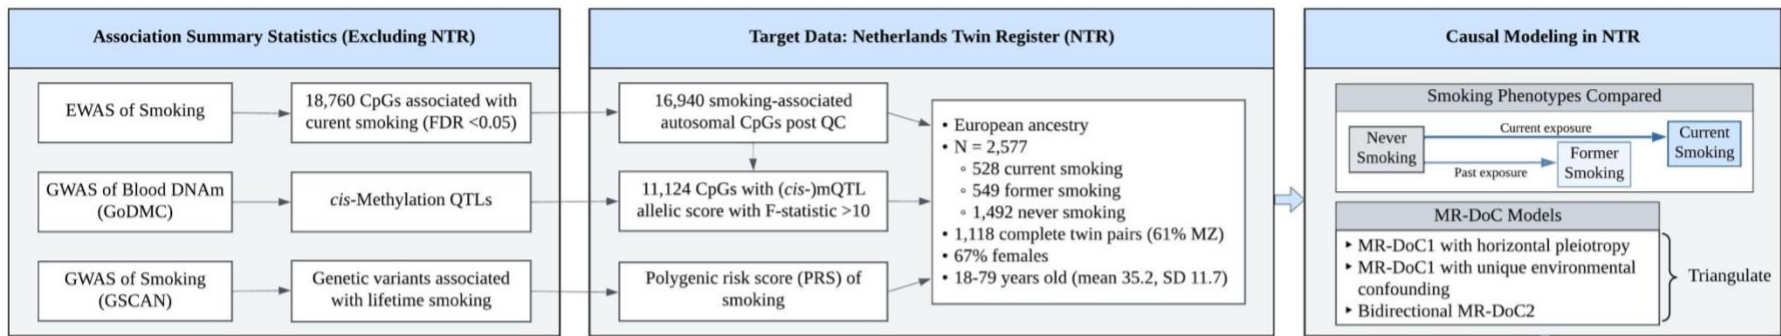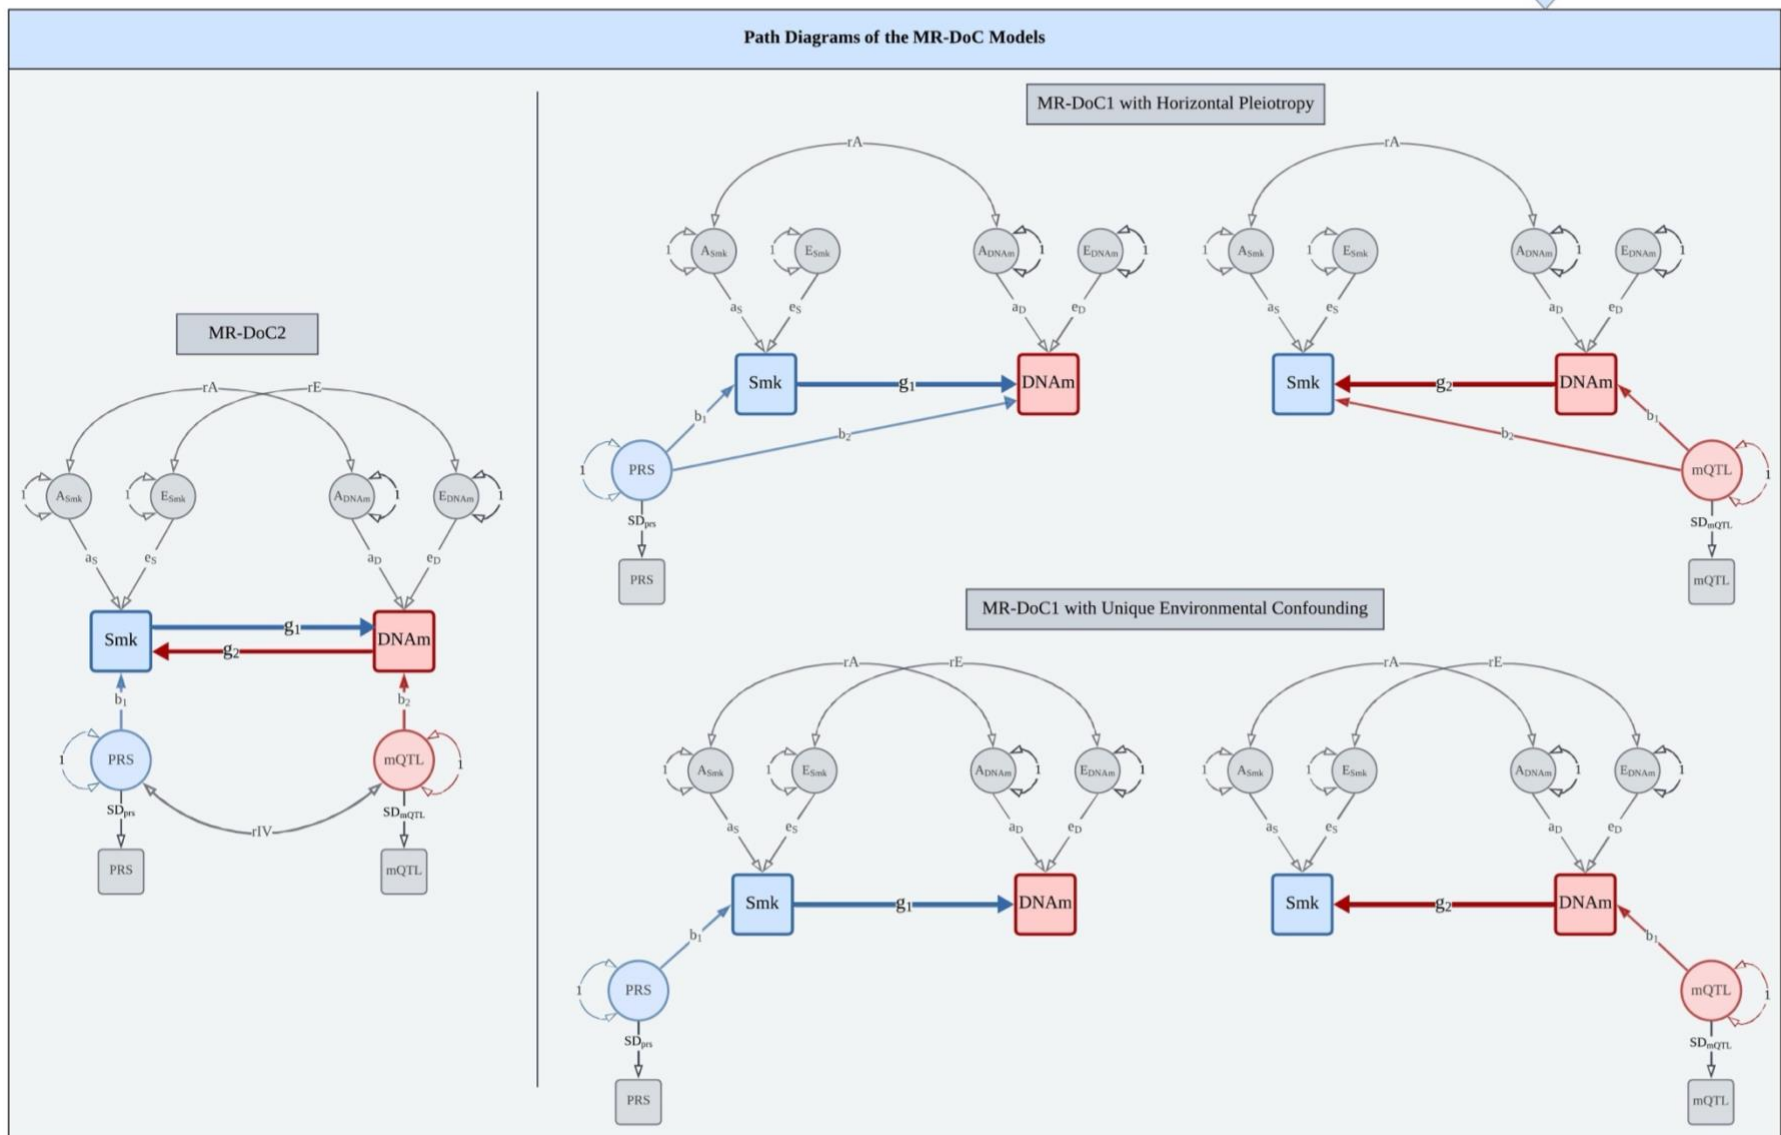

180  
181  
182  
183  
184  
185  
186  
187  
188  
189  
190  
191  
192

**Figure 1. Study Design.**

*Overview of the data and MR-DoC models used to examine the causality between cigarette smoking and blood DNA methylation (DNAm) in the Netherlands Twin Register. The models were fitted separately for current (versus never) and former (versus never) smoking. Applying the five MR-DoC models shown in the path diagrams, we obtained a set of three causal estimates in each direction of causation: Smoking (Smk) → DNAm (the blue paths labelled  $g_1$ ) and DNAm → Smoking (the red paths labelled  $g_2$ ).*

*In each MR-DOC model, the residual variance of each phenotype (smoking status liability and DNAm levels) is decomposed into latent additive genetic (A) and unique environmental (E) factors. The correlation between the latent A factors of smoking and DNAm ( $r_A$ ) represents confounding due to additive genetic factors, while that between the latent E factors ( $r_E$ ) represents confounding due to unique environmental factors. Note that these models did not include shared environmental (C) variance components, as the AE model was found to be the most parsimonious in univariate twin models (see **Supplementary Methods**).*

*Note. For better readability, the path diagrams show only the within-individual part of the models fitted to data from twin pairs. The squares/rectangles indicate observed variables, the circles indicate latent (unobserved) variables, the single-headed arrows indicate regression paths, and the double-headed curved arrows indicate (co-)variances.*



193

## Methods

### 194 Study Sample

195 We analysed data from 706 monozygotic (MZ) twin pairs, 412 dizygotic (DZ) twin pairs, and  
196 341 individuals without their co-twin. The participants, 1,730 (67%) females and 847 (33%)  
197 males, were aged 18–79 (mean 35.2; S.D. 11.7 years) at the time of blood draw. Sample and  
198 variant quality control (QC) of genotypic data, imputation, genetic principal component analysis  
199 (PCA), and ancestry-outlier pruning have been described previously [20], and reviewed in  
200 **Supplementary Methods**. Since the summary statistics of methylation quantitative trait loci  
201 (mQTLs) were available for European ancestry only [21], we excluded 109 participants  
202 identified as European-ancestry outliers to avoid bias due to ancestry mismatch.

203

204 The NTR is approved by the Central Ethics Committee on Research Involving Human Subjects  
205 of the VU University Medical Centre, Amsterdam, an Institutional Review Board certified by the  
206 U.S. Office of Human Research Protections (IRB number IRB00002991 under Federal-wide  
207 Assurance- FWA00017598; IRB/institute codes, NTR 98-222, 2003-180, 2008-244). All  
208 participants provided written informed consent before data collection.

### 209 Peripheral Blood DNA Methylation and Cell Counts

210 Epigenome-wide DNAm in peripheral whole blood was measured with the Infinium  
211 HumanMethylation450 BeadChip Kit (“Illumina 450k” microarray), following manufacturer’s  
212 protocol [22]. DNAm data QC and normalisation were performed using a custom pipeline  
213 developed by the BIOS (Biobank-based Integrative Omics Study) Consortium [23]  
214 (**Supplementary Methods**). In the current analyses, only autosomal probes were included,  
215 yielding 411,169 CpGs that passed QC, of which 16,940 sites were associated with current  
216 smoking (FDR <0.05) in a previous independent EWAS [2] (hereafter called the “smoking-  
217 associated CpGs”). These CpGs were analysed in the MR-DoC1 models for *Current Smoking* →  
218 *DNAm* (**Figure 2**). Likewise, 2,330 autosomal, post-QC CpGs, previously associated with former  
219 smoking [2] (hereafter called the “former-smoking-associated CpGs”), were analysed in the MR-  
220 DoC1 models for *Former Smoking* → *DNAm*. Differential white blood cell counts were also  
221 measured in the blood samples [23].

222

223 The normalised  $\beta$ -values of DNAm at each CpG were residualised by regressing out age, sex  
224 (genotypically inferred biological sex, matched with self-reported sex), measured white blood  
225 cell percentages (neutrophils, monocytes, and eosinophils), HM450k array row, and bisulfite  
226 sample plate [24]. The residuals were standardised (mean = 0, S.D. = 1). As in the previous NTR

227 work [24], we excluded lymphocyte percentage as a covariate, given its multicollinearity with  
228 neutrophil percentage. We excluded basophil percentage because of its low variance.  
229

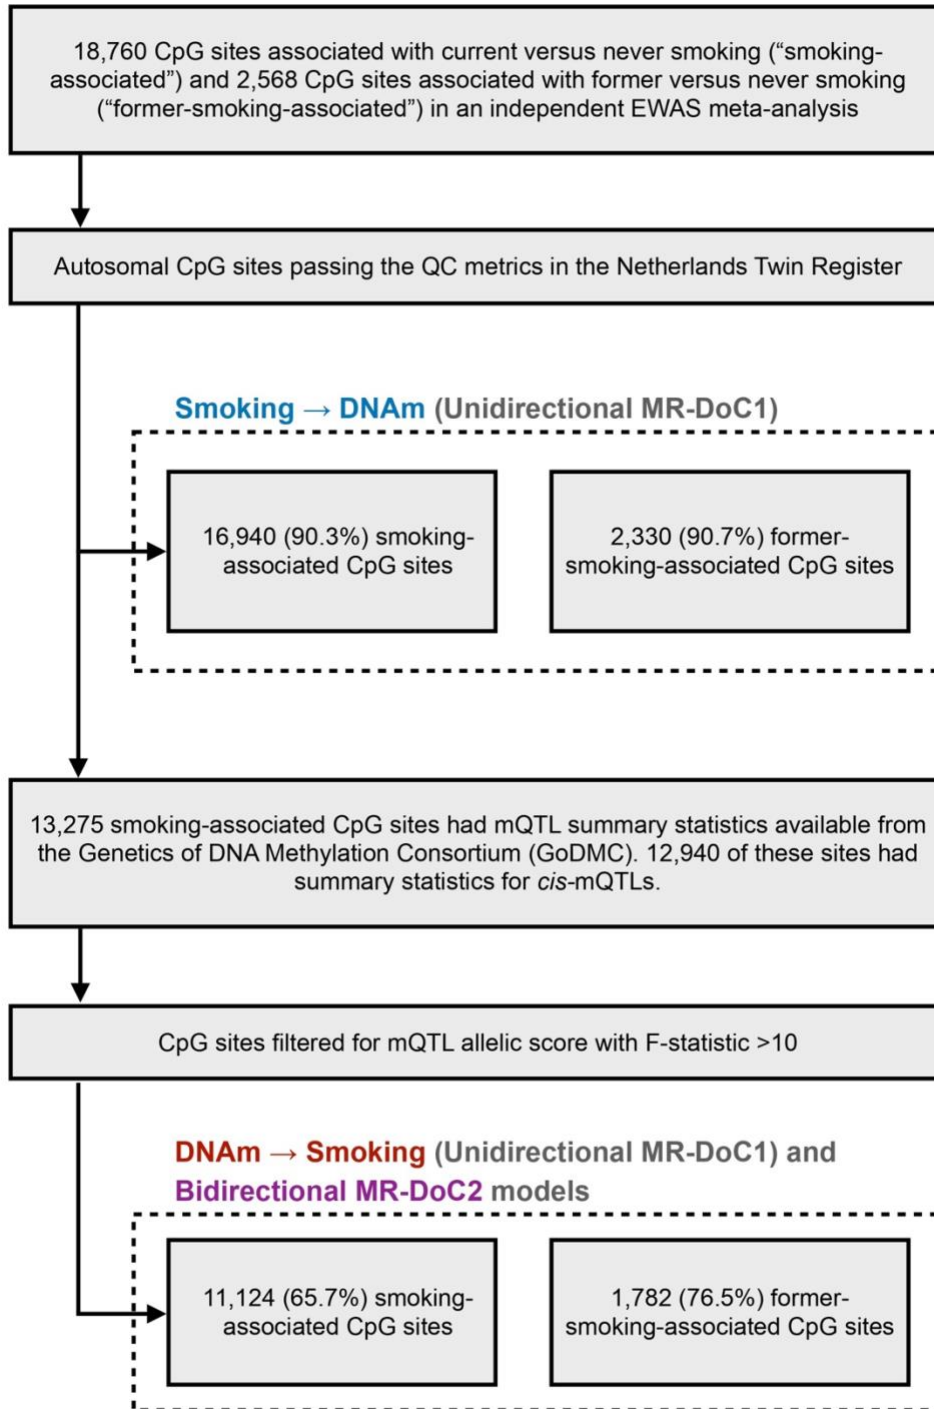

230

231 **Figure 2. Selection of CpGs tested in each MR-DoC model.**

232 *Previous independent EWAS meta-analysis of cigarette smoking [2] examined DNA methylation*  
233 *(DNAm) at CpGs from the Illumina HumanMethylation450 BeadChip array [22], which was also*  
234 *used to measure DNAm in the NTR biobank. In the unidirectional MR-DoC1 models for Smoking*

235 → DNAm, we included autosomal CpGs associated with smoking in the EWAS meta-analysis  
236 that also passed the QC metrics in NTR. The MR-DoC1 models for DNAm → Smoking and the  
237 bidirectional MR-DoC2 models were restricted to a subset of these sites having cis-mQTL  
238 summary statistics from the GoDMC [21] and a resulting mQTL allelic score with F-statistic  
239 >10.  
240

## 241 **Cigarette Smoking**

242 Self-reported cigarette smoking status was recorded during blood sample collection in 2004-  
243 2008 and 2010-2011 (**Supplementary Methods**), with the question, “Do you smoke?” with  
244 three response options: “No, I never smoked” (N = 1,492), “No, but I did in the past” (N = 549),  
245 and “Yes” (N = 528). The responses were checked for consistency with data from the  
246 longitudinal NTR surveys and plasma cotinine levels (**Supplementary Methods**).

## 247 **Instrumental Variables**

248 **mQTL allelic scores.** We used a weighted sum of DNAm-increasing alleles at *cis*-mQTLs  
249 (“mQTL allelic score”) as the IV for DNAm, computed using clumping and thresholding in  
250 *PLINK1.9* [25] (**Supplementary Methods**). Of the 16,940 smoking-associated CpGs, 12,940  
251 had summary statistics for *cis*-mQTLs available from the Genetics of DNA Methylation  
252 Consortium (GoDMC; excluding NTR) [21] (**Figure 2**). We used only *cis*-mQTLs, i.e., SNPs  
253 within 1Mb of the CpG, given that SNPs located close to the CpG are likely to be associated  
254 with smoking *via* DNAm. To further guard against potential horizontal pleiotropy with smoking,  
255 we relied on the consistency of the causal estimates in MR-DoC models accommodating  
256 horizontal pleiotropy. To reduce the risk of weak-instrument bias, we restricted the MR-DoC1  
257 models for *DNAm*  $\rightarrow$  *Current Smoking* and the bidirectional MR-DoC2 models to 11,124  
258 (65.7%) CpGs having an mQTL allelic score with F-statistic  $>10$  (**Figure 2**). The included  
259 mQTL allelic scores had an incremental  $R^2$  for the respective CpG site ranging from 0.43% to  
260 76.95% (mean 9.04%, S.D. = 10.94%). Similarly, a subset of 1,782 (76.5%) former-smoking-  
261 associated CpGs had mQTL allelic scores with F-statistic  $>10$  and were examined in the MR-  
262 DoC1 models for *DNAm*  $\rightarrow$  *Former Smoking* and the bidirectional model (MR-DoC2).

263  
264 **PRS of Regular Smoking Initiation.** We used a PRS of lifetime regular-smoking initiation as the  
265 IV for smoking status, computed using *LDpred v0.9* [26] with European-ancestry GWAS  
266 summary statistics [27] (**Supplementary Methods**). This PRS had an incremental liability-scale  
267  $R^2$  of 5.07% (F-statistic = 73.2) for current versus never smoking, and 2.02% (F-statistic = 28.8)  
268 for former versus never smoking. The smoking phenotypes in MR-DoC models differed from the  
269 GWAS phenotype (smoking initiation = current/former versus never smoking). However, in  
270 these causal models, the strength of the IV, the extent of horizontal pleiotropy with DNAm, and  
271 the estimated causal effects on DNAm apply to the smoking phenotype operationalised in the  
272 target data.

273  
274 We residualised the smoking PRS and all mQTL allelic scores for the genotyping platform and  
275 the first ten genetic PCs, and standardised the residuals (mean = 0, S.D. = 1).

## 276 **MR-DoC Models**

277 Causal inference in twin data leverages the cross-twin cross-trait correlations to estimate the  
278 direction and magnitude of potential causal effects between traits [14]. On the other hand, MR  
279 analyses rely on the assumptions that the IV is (1) associated with the exposure (“relevance”), (2)  
280 not correlated with any omitted confounding variables (“exchangeability”), and (3) independent  
281 of the outcome, given the exposure (“exclusion restriction”) [3,28]. Here, we used the criterion  
282 of F-statistic >10 to identify “relevant” IVs. Further, genetic variants are assumed to satisfy the  
283 “exchangeability” assumption, given Mendel’s laws of random segregation and independent  
284 assortment. The “exclusion restriction” assumption for a genetic IV implies no horizontal  
285 pleiotropy with the outcome. Here, we applied different MR-DoC models (**Figure 1**) to account  
286 for possible horizontal pleiotropy. MR-DoC1 accommodates horizontal pleiotropy under the  
287 assumption of no confounding due to unique environmental factors. The alternative specification  
288 of MR-DoC1 accommodates unique environmental confounding (parameter “rE” in **Figure 1**),  
289 given the assumption of no horizontal pleiotropy [15]. In both cases, the model includes  
290 confounding due to genetic and shared environmental influences on the exposure and the  
291 outcome. In MR-DoC2 models, we estimated bidirectional causal effects by including the  
292 smoking PRS and the mQTL allelic score, allowing the two IVs to covary [16]. Beyond the  
293 causal effects between smoking and DNAm, the covariance between the PRS and the mQTL  
294 allelic score may arise from several sources, including shared pleiotropic SNPs, LD between the  
295 constituent SNPs, and population structure. By accommodating these sources of covariance, MR-  
296 DoC2 may help reduce potential biases in the causal estimates.

297  
298 The MR-DoC models were fitted in the *OpenMx* package (v2.21.8) [29] in R (v4.3.2), using the  
299 code from the original publications [15,16] (**Supplementary Methods**). Binary smoking status  
300 was examined in the liability threshold model [30], so the causal estimate is interpreted as the  
301 effect of the underlying smoking *liability* rather than smoking *exposure*. Age and sex were  
302 included in the model as covariates of smoking status. For each set of causal estimates across  
303 CpGs (**Figure 1**), we calculated the Bayesian genomic inflation factor ( $\lambda$ ) using the R package  
304 *bacon* [31], made QQ plots using the R package *GWASTools* [32], and applied Benjamini-  
305 Hochberg FDR correction [33] to the p-values.

## 306 **Functional Enrichment Analyses**

307 We used *Metascape* (v3.5.20240101) [34] to perform gene-set annotation and functional  
308 enrichment analyses of the CpGs with potential causal effects in either direction  
309 (**Supplementary Methods**). The input list of gene IDs was selected based on proximity to the  
310 CpGs with consistent and nominally significant ( $p < 0.05$ ) estimates in all three models.

311 Furthermore, to explore the tissue-specific functional relevance of the implicated CpGs, we  
312 performed *eFORGE 2.0* (experimentally derived Functional element Overlap analysis of  
313 ReGions from EWAS) analyses [35–37]. We examined the overlap between the implicated CpGs  
314 and multiple comprehensive reference sets of tissue-/cell type-specific gene regulatory genomic  
315 and epigenomic features, including chromatin states, histone marks, and DNase-I hotspots  
316 **(Supplementary Methods)**.

317  
318

319

320

## Results

### 321 **Exemplar: Putative causality between current smoking and *AHRR* DNAm**

322 To illustrate the three MR-DoC models, we first present the results for two CpGs (cg23916896  
323 and cg05575921) in the Aryl-Hydrocarbon Receptor Repressor (*AHRR*) gene, with well-  
324 established DNAm associations with cigarette smoking [2].

325

326 For probe cg23916896 (**Supplement Figure S1A**), the mQTL allelic score had an incremental  
327  $R^2$  of 8.03% (F-statistic = 156.4). The MR-DoC models indicated that higher liability for current  
328 smoking likely causes hypomethylation of cg23916896, with statistically significant (FDR  
329  $<0.05$ ), consistently negative causal estimates in all three models. The reverse effect of  
330 cg23916896 methylation on the liability for current smoking had consistent negative estimates.  
331 However, the estimates were significant at FDR  $<0.05$  in MR-DoC1 with horizontal pleiotropy,  
332 but only nominally significant ( $p <0.05$ ) in the other two models. Taken together, these results  
333 provide robust evidence for current smoking's causal effects on cg23916896 methylation, with  
334 suggestive evidence for reverse causation. Previous MR studies have not examined this CpG site,  
335 as these studies focused on a few pre-selected sites [10,11]. Our results indicate a potential  
336 bidirectional causal relationship between cigarette smoking and cg23916896, i.e., smoking-  
337 induced hypomethylation at this locus may reciprocally increase smoking liability.

338

339 In comparison, probe cg05575921 had an mQTL allelic score with an incremental  $R^2$  of 1.74%  
340 (F-statistic = 31.6). Similar to cg23916896, the effect of current smoking liability on  
341 cg05575921 methylation was consistently negative, with FDR  $<0.05$  in all three models  
342 (**Supplement Figure S1B**). This aligns with the previously reported negative, albeit non-  
343 significant, effect of *lifetime* smoking [10]. For the reverse effect of cg05575921 methylation on  
344 smoking liability, the estimates were negative in all three models, though statistically significant  
345 only in MR-DoC1 with horizontal pleiotropy. Notably, the estimates for cg05575921 are  
346 comparable to those for cg23916896, but have larger standard errors, likely due to the weaker IV  
347 of the former (mQTL allelic score). This variability in the precision of the causal estimates  
348 underscores the differences in the strength of the IV across CpGs and, consequently, the power  
349 to estimate their causal effect on smoking.

350



351 **Evidence of more widespread effects of current smoking on DNAm than *vice***  
352 ***versa***

353 We used genomic inflation factor,  $\lambda$ , to evaluate potential widespread, small causal effects of  
354 current smoking on DNAm. Across the smoking-associated CpGs, MR-DoC1 including  
355 horizontal pleiotropy ( $rE = 0$ ) had  $\lambda = 1.44$ , while MR-DoC1 with unique environmental  
356 confounding, but no horizontal pleiotropy, showed  $\lambda = 1.20$ . For comparison, fitting similar  
357 models epigenome-wide showed less inflation ( $\lambda = 0.98$  and  $\lambda = 1.09$ , respectively), suggesting  
358 enrichment of low p-values among the smoking-associated CpGs, as also reflected in the QQ  
359 plots (**Supplementary Figures S2-S3**). The epigenome-wide inflation is consistent with that for  
360 cigarettes per day ( $\lambda > 1.1$ ), as seen in prior two-sample MR analyses [21]. In MR-DoC2 models,  
361 the estimated reverse effects of DNAm on current smoking showed little inflation ( $\lambda = 1.01$ )  
362 compared to current smoking's effects on DNAm in the same model ( $\lambda = 1.20$ ; **Supplementary**  
363 **Figures S4-S5**). These findings suggest that the causal influences of current smoking on DNAm  
364 contribute partly to the previously reported EWAS hits. However, for the reverse effects of  
365 DNAm on current smoking, the absence of  $\lambda$  inflation does not preclude potential localised small  
366 effects, albeit at fewer CpGs.

367  
368 There was considerable variability in the number of CpGs with statistically significant causal  
369 estimates across models (**Figure 3; top panel**), with a relatively higher number of significant  
370 estimates in MR-DoC1 with horizontal pleiotropy, likely due to its higher power [38]. Looking at  
371 the intersection of significant *Current Smoking*  $\rightarrow$  *DNAm* estimates across models, 259 CpGs  
372 showed FDR  $< 0.05$  in at least two models, while 64 sites showed FDR  $< 0.05$  in all three models.  
373 These 64 sites also showed a consistent direction of effect in all models (**Supplementary Figure**  
374 **S6, Table S1**). Thus, we considered these 64 CpGs to exhibit robust evidence for current  
375 smoking's effects on DNAm, including hypomethylation of 59 sites and hypermethylation of the  
376 other five (**Figure 3; bottom panel**). These CpGs annotate to several top genes implicated in  
377 prior EWAS of smoking [2], including hypomethylation of CpGs in/near *AHRR*, *ALPPL2*,  
378 *CNTNAP2*, and *PARD3* and hypermethylation of CpGs in *MYO1G*. Only one of these 64 CpGs  
379 lies within the major histocompatibility complex (MHC) region: cg06126421 (near *HLA-DRB5*).  
380 Due to its complex LD structure, the causal estimates of the sites in the MHC region should be  
381 interpreted with caution.

382

### Putative Causal Effects of Current Smoking on DNA Methylation in MR-DoC Models

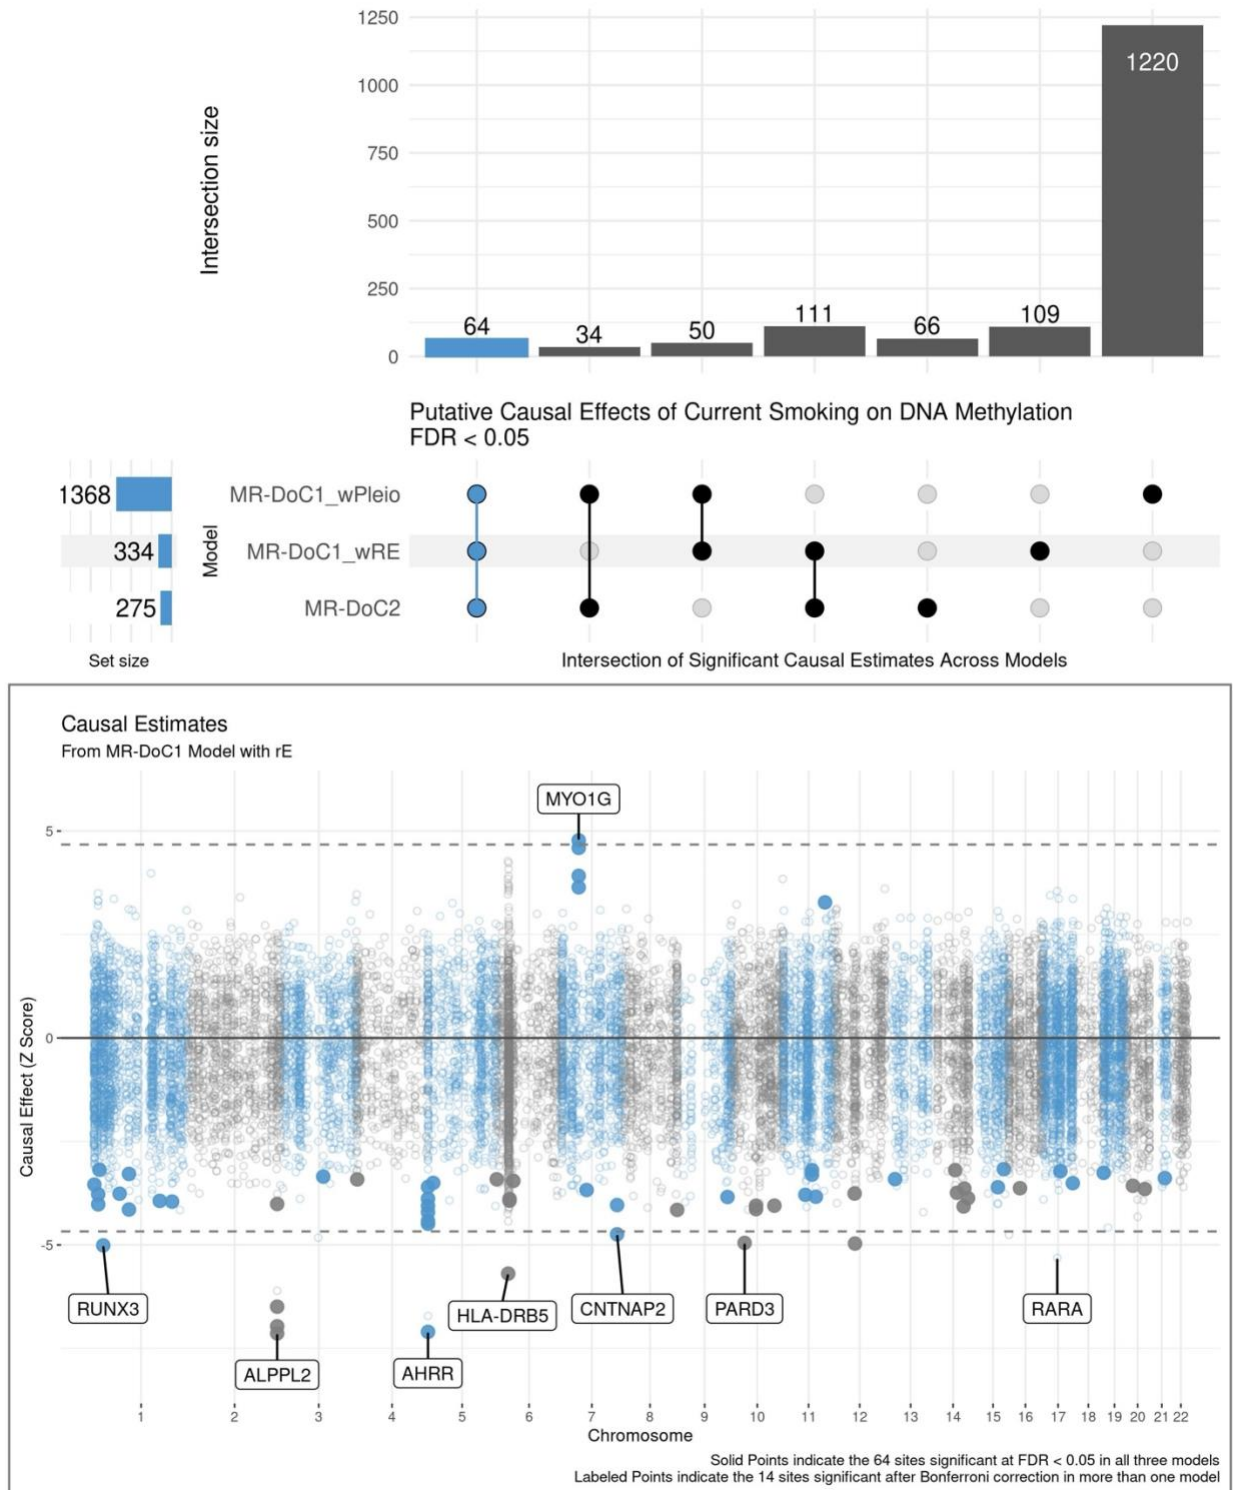

383  
384

385 **Figure 3. Putative Causal Effects of Current Smoking on Blood DNA Methylation in MR-**  
386 **DoC Models**

387 *The top panel shows an UpSet plot of the intersection of CpGs with statistically significant (FDR*  
388 *<0.05) estimates of Current Smoking → DNAm in the three MR-DoC models. The matrix*  
389 *consists of the models along the three rows and their intersections along the columns. The*  
390 *horizontal bars on the left represent the number of CpGs with significant (FDR <0.05) causal*  
391 *estimates in each model. The vertical bars represent the number of CpGs belonging to the*  
392 *respective intersection in the matrix. A similar UpSet plot with Bonferroni correction is shown in*  
393 **Supplementary Figure S7.**

394 *The bottom panel shows a Miami plot of the Current Smoking → DNAm causal estimates across*  
395 *16,940 smoking-associated CpGs. The X-axis shows the genomic positions of the CpGs aligned*  
396 *to Genome Reference Consortium Human Build 37 (GRCh37). The Y-axis shows the Z-statistic*  
397 *of the estimated effect of the liability for current (versus never) smoking on (residualised and*  
398 *standardised) DNA methylation b-values in the MR-DoC1 model with unique environmental*  
399 *confounding (rE). The solid points indicate the 64 sites with significant causal estimates (FDR*  
400 *<0.05) in all three models (i.e., the blue vertical bar in the UpSet plot). The 14 CpGs with causal*  
401 *estimates significant after Bonferroni correction in more than one model are labelled by their*  
402 *respective nearest gene.*

403 *Note. The data underlying these plots are in **Supplementary Table S1.***

404 —

405

406

407 For *DNAm* → *Current Smoking*, 44 CpGs showed FDR <0.05 in at least two models, but only  
408 three CpGs had FDR <0.05 in all models (**Figure 4B**). The three CpGs also had consistent,  
409 positive estimates across models, suggesting that hypermethylation of CpGs in *GNG7*, *RGS3*,  
410 and *SLC15A4* genes may increase smoking liability (**Figure 4A**). None of these sites has been  
411 previously reported to influence smoking liability [11].

## 412 **Suggestive Evidence of Bidirectional Effects**

413 Of the 64 sites with robust evidence of *Current Smoking* → *DNAm* effects, three sites also had  
414 consistently negative, nominally significant ( $p < 0.05$ ) estimates of reverse *DNAm* → *Current*  
415 *Smoking* effects (**Figure 4C**). The three CpGs (cg23916896, cg11902777, cg01899089) are  
416 located in the *AHRR* gene, suggesting that current smoking may cause hypomethylation of CpGs  
417 in *AHRR*, which may reciprocally increase smoking liability. Among the CpGs with robust  
418 evidence of DNAm effects on current smoking, cg13078421 (*GNG7*) also showed consistently  
419 positive, nominally significant estimates of current smoking's effects on DNAm. Thus, *GNG7*  
420 hypermethylation increases smoking liability, with a potential reverse effect of current smoking  
421 on *GNG7* methylation. Additionally, 15 CpGs had consistent, nominally significant bidirectional  
422 causal estimates in all three models, though not significant after FDR correction in either  
423 direction (**Supplementary Figure S9**).

424

425

Putative Reverse and Bidirectional Causal Effects of DNA Methylation on Current Smoking in MR-DoC Models

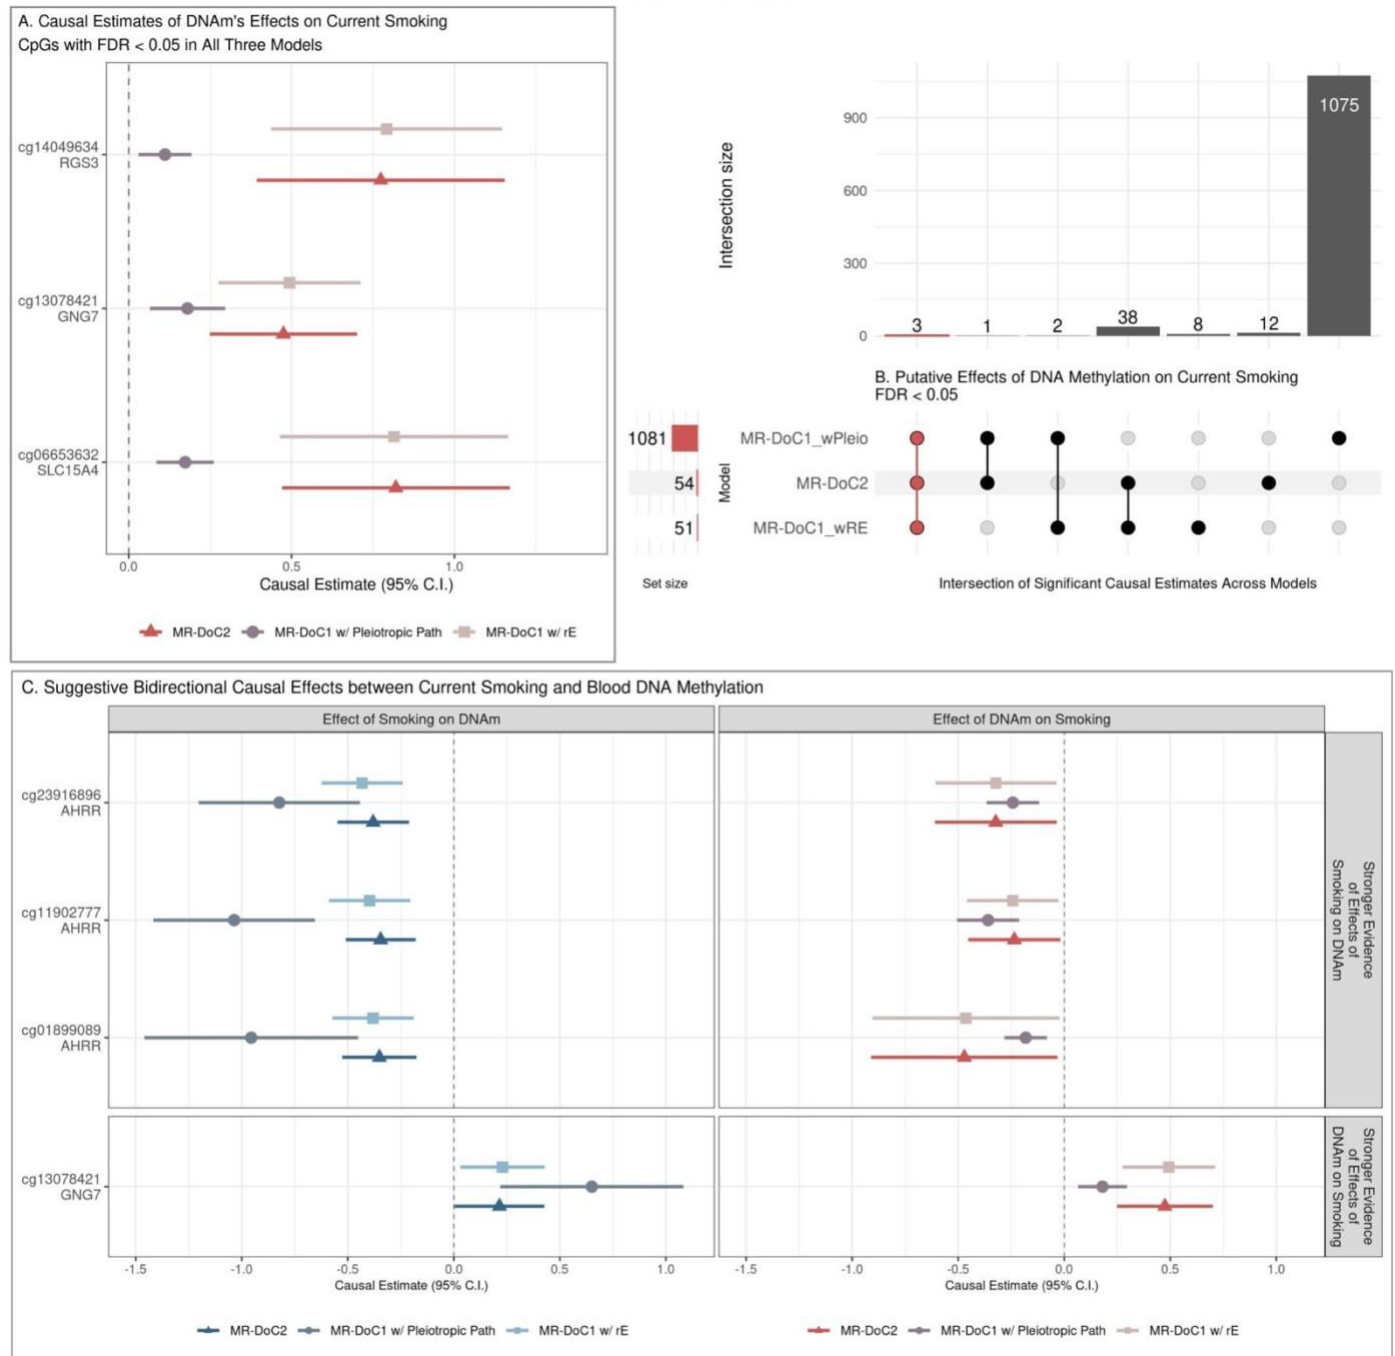

426

427 **Figure 4. Potential reverse and bidirectional effects of blood DNA methylation on current**  
428 **smoking**

429 (A.) Estimates and Wald-type 95% confidence intervals of DNAm → Current Smoking causal  
430 effects in each of the three MR-DoC models: bidirectional MR-DoC2, MR-DoC1 with horizontal  
431 pleiotropic path, and MR-DoC1 with unique environmental confounding (rE). (B.) An UpSet plot  
432 of the intersection of CpGs with statistically significant (FDR < 0.05) estimates of DNAm →

433 *Current Smoking in each of the three MR-DoC models. The matrix consists of the models along*  
434 *the three rows and their intersections along the columns. The horizontal bars on the left*  
435 *represent the number of CpGs with significant (FDR <0.05) causal estimates in each model. The*  
436 *vertical bars represent the number of CpGs belonging to the respective intersection in the*  
437 *matrix. A similar UpSet plot with Bonferroni correction is shown in **Supplementary Figure S8***  
438 *for comparison. (C.) Estimates and Wald-type 95% confidence intervals of bidirectional causal*  
439 *effects between current smoking and DNA methylation in the three MR-DoC models. In panels A*  
440 *and C, the Y-axis labels indicate the CpG probe IDs and the respective genes in which the CpGs*  
441 *are located.*

442 *Note. The numerical data underlying these plots are in **Supplementary Tables S1-S4.***

443

444 —

445

446 **DNAm loci potentially influenced by smoking are enriched for biological**  
447 **processes relevant to smoking's adverse health outcomes**

448 In follow-up functional enrichment analyses, we identified 525 CpGs with potential *Current*  
449 *Smoking* → *DNAm* effects (excluding 21 sites in the MHC region), based on consistent,  
450 nominally significant estimates in all models (**Supplementary Table S1**). The mapped genes  
451 showed extensive significant enrichment (FDR <0.05) for ontology clusters, including  
452 hemopoiesis, cell morphogenesis, inflammatory response, regulation of cell differentiation, and  
453 regulation of nervous system development, underscoring DNAm's potential role in the adverse  
454 health sequelae of smoking (**Supplementary Figures S10-S12; Tables S5-S6**). In the *eFORGE*  
455 analyses, these sites were significantly enriched (FDR <0.05) for overlap with a wide range of  
456 gene regulatory elements in most of the tissue/cell types in reference datasets, suggesting  
457 pervasive functional consequences of smoking's effects on DNAm (**Supplementary Figures**  
458 **S13-S15; Tables S7-S9**).

459 **CpGs with consistent effects on current smoking show enrichment for brain-**  
460 **related gene regulatory elements**

461 We identified 64 CpGs with potential *DNAm* → *Current Smoking* effects (none in the MHC  
462 region), as indicated by consistent, nominally significant estimates across models  
463 (**Supplementary Figure S16**). Gene-set enrichment analyses revealed no significant functional  
464 enrichment (FDR <0.05), likely due to too few loci (**Supplementary Figures S17-S18; Tables**  
465 **S10-S11**). However, the *eFORGE* analyses, which use precise chromatin-based information for  
466 each CpG, showed significant enrichment (FDR <0.05) for overlap with enhancers in the brain,  
467 blood (primary B cells, hematopoietic stem cells), lung, and mesodermal embryonic stem cells  
468 (**Supplementary Figures S19-S21; Tables S12-S14**). These CpGs also showed significant  
469 enrichment for histone marks in multiple tissues/cell types (including the brain, blood, and lung),  
470 though the overlap with DNase-I hotspots was not significantly enriched. The tissues/cell types  
471 predicted to be relevant for DNAm's effects on smoking liability may be prioritised for follow-  
472 up functional studies.

473  
474 To further gauge the tissue-specificity of *eFORGE* enrichment, we performed iterative follow-up  
475 analyses with the CpGs overlapping with tissue/cell types of interest (**Supplementary Figures**  
476 **S22-S24; Tables S15-S17**). These analyses elucidated a subset of 17 CpGs with significant and  
477 highly specific enrichment for enhancers and histone marks (H3K4me1 and H3K4me4) in the  
478 brain (**Figure 5**), along with weaker enrichment for H3K4me1 in the adrenal gland and thymus.  
479 Ten of the 17 sites also overlapped with DNase-I hotspots in the brain, though the enrichment  
480 was not statistically significant (FDR = 0.08) (**Supplementary Figure S25, Table S20**). The

481 causal estimates and mapped genes of these 17 CpGs are shown in **Supplementary Figure S26**.  
482 Four of these CpGs also had consistent estimates of current smoking’s effects on DNAm  
483 (identified by the column “g1\_nominal” in **Supplementary Table S4**): cg25612391  
484 (*SLC25A42*), cg05424060 (*GNAII*), cg10590964 (near *KIAA2012*), and cg05877788 (*TP53I13*).  
485 Furthermore, prior pre-clinical and clinical studies have implicated 14 of the 17 mapped genes,  
486 including three with potential bidirectional effects, in behavioural or neurological traits,  
487 including alcohol dependence (*OSBPL5*) [39], cocaine use (*SLCO5A1*) [40], anxiety (*CCDC92*)  
488 [41], depression (*GNAII*) [42], encephalomyopathy and brain stress response (*SLC25A42*)  
489 [43,44], and dementia/Alzheimer’s disease pathology (*SIAH3*, *SRM*, *TP53I13*) [45–47].  
490  
491 Similar follow-up analyses with the CpGs overlapping with enhancers in the lung (potentially  
492 etiologically relevant tissue) and the primary B-cells in cord blood (the tissue type with the most  
493 significant enrichment) showed enrichment across several tissue/cell types, suggesting non-  
494 specificity of the overlap in these tissues (**Supplementary Figures S27-S32; Tables S21-S26**).  
495 Furthermore, the 18 CpGs overlapping with enhancers in primary B cells mapped to 16 genes, of  
496 which five have been previously associated with (any) blood cell counts, but only one with  
497 lymphocyte count in GWAS [48]. Thus, the sites driving the enrichment for B cells had little  
498 overlap with the known lymphocyte-count GWAS associations, indicating likely minimal  
499 confounding by residual cell-composition effects [35]. By comparison, the 64 CpGs with  
500 potential *DNAm* → *Current Smoking* effects annotated to 51 genes, of which 16 show GWAS  
501 associations with (any) blood cell counts and only two with lymphocyte count.  
502



eFORGE Analyses of the CpG Sites with Potential Effects of DNA Methylation on Current Smoking

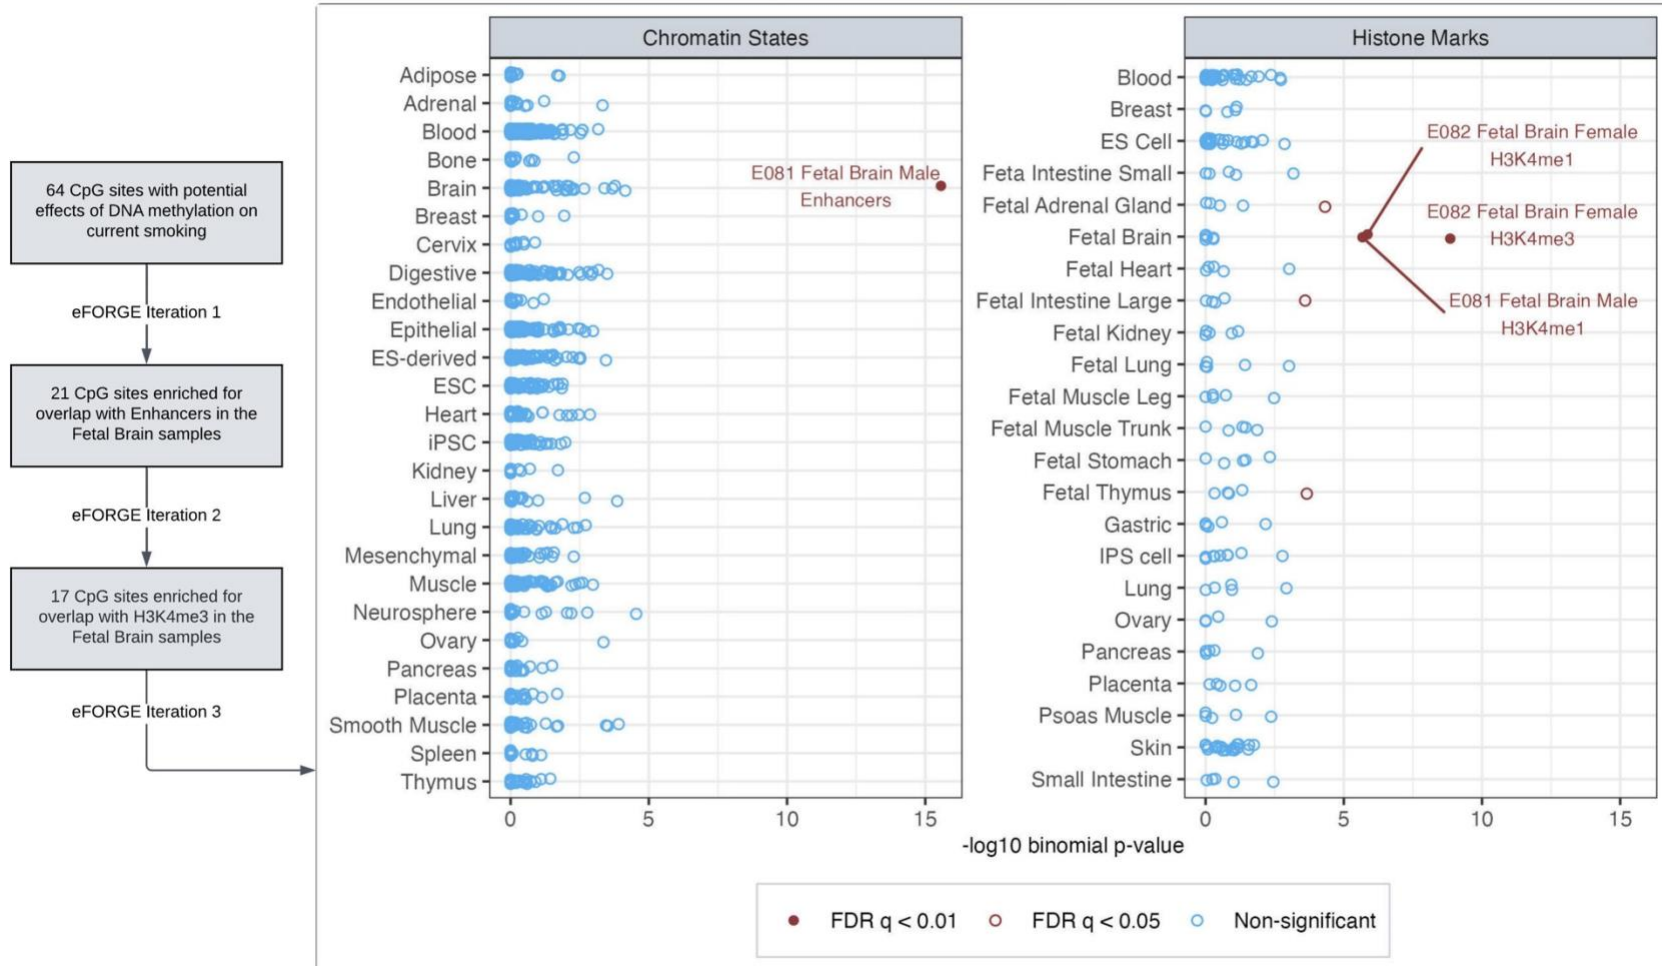

503

504 *Figure 5. Among the CpGs with potential effects of blood DNA methylation on current smoking liability, iterative eFORGE*  
 505 *analyses elucidated sites enriched for overlap with brain-related chromatin states and histone marks.*

506 *The first iteration of eFORGE examined the 64 CpGs with potential effects of blood DNA methylation on current smoking liability*  
507 *(Supplementary Figure S15), revealing 21 CpGs enriched for overlap with enhancers in the brain (Supplementary Figure S18/Table*  
508 *S12). In follow-up analyses restricted to these 21 CpGs (eFORGE iteration 2), all 21 probes were also enriched for the brain*  
509 *H3K4me1 marks, while 17 of these probes overlapped with H3K4me3 marks in the brain (Supplementary Figure S22/Table S16). This*  
510 *iteration also showed significant enrichment (FDR  $q < 0.01$ ) for histone marks in other tissues, including small and large intestines,*  
511 *adrenal gland, and thymus. So, to identify a subset of these CpGs with potentially more specific enrichment for brain-related*  
512 *functional elements, we restricted further analyses to the 17 sites overlapping with the brain H3K4me3 marks (eFORGE iteration 3).*  
513 *This figure shows that these 17 sites showed highly specific enrichment for enhancers and histone marks in the brain (**Supplementary***  
514 ***Tables S18-S19**). Ten of these sites also overlapped with DNase-I hotspots in the brain (Supplementary Table S20).*  
515

## 516 **Attenuated effects of former smoking on DNAm**

517 Similar analyses for former smoking showed relatively attenuated inflation factor ( $\lambda$ ) in all  
518 models. For instance, MR-DoC2 models fitted across the 11,124 smoking-associated CpGs had  $\lambda$   
519 = 1.11 for *Former Smoking*  $\rightarrow$  *DNAm*, and  $\lambda = 0.99$  for *DNAm*  $\rightarrow$  *Former Smoking*, compared to  
520 1.20 and 1.01, respectively, for current smoking. Note that these  $\lambda$  calculations were not  
521 restricted to the former-smoking-associated CpGs to allow for a comparison with current  
522 smoking.

523

524 Among the former-smoking-associated CpGs, only five sites showed robust evidence of former  
525 smoking's effects on DNAm, with consistent, statistically significant (FDR <0.05) causal  
526 estimates in all three models (**Supplementary Figure S33**). These CpGs include cg05575921 in  
527 *AHRR*, cg05951221, cg01940273, and cg21566642 near *ALPPL2*, and cg06126421 near *HLA-*  
528 *DRB5* gene (in the MHC region). The causal estimates at these sites are similar to those of  
529 *current* smoking's effects on DNAm, with overlapping confidence intervals (**Figure 6**). Thus,  
530 the limited reversibility of smoking's causal effects may underlie the persistent associations of  
531 former smoking with DNAm at these sites [2]. For the reverse effects of DNAm on former  
532 smoking, no CpG showed consistent (at least nominally significant) causal estimates across  
533 models (**Supplementary Figure S34**). Nevertheless, of the three CpGs with robust evidence of  
534 DNAm's effects on current smoking, two were among the former-smoking-associated CpGs and  
535 had overlapping confidence intervals of DNAm's estimated effects on *former* and *current*  
536 smoking (**Supplementary Figure S35**).

537

538

### CpGs with Putative Effects of Former Smoking on DNA Methylation

Sites with FDR < 0.05 in All Three Models

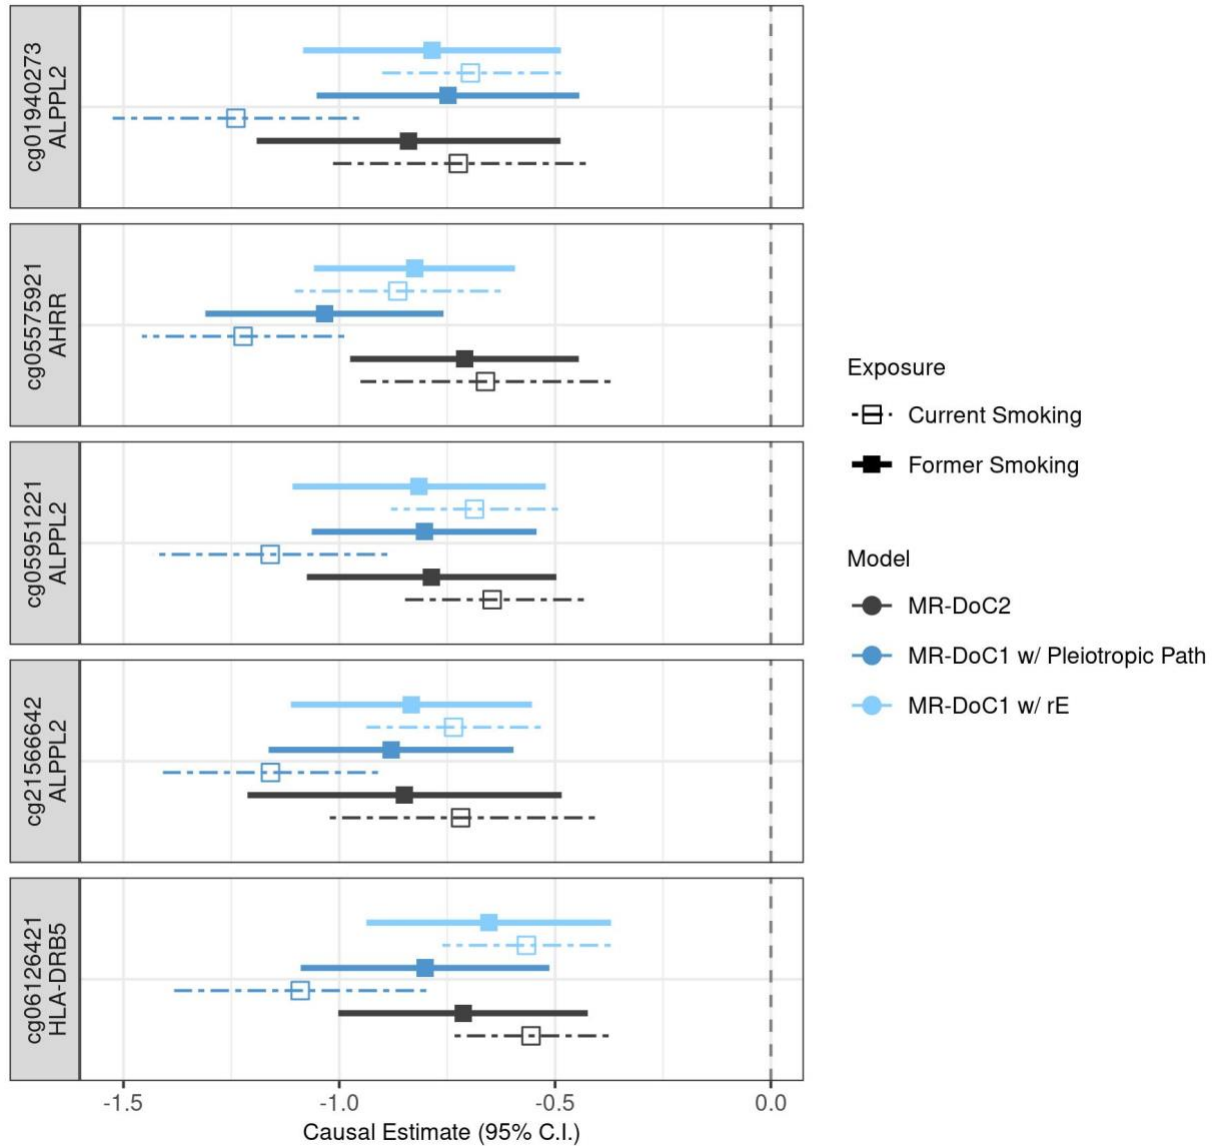

539

540 **Figure 6. Putative causal effects of former smoking on blood DNA methylation.**

541 *Estimates and Wald-type 95% confidence intervals of the causal effects of the liability for former*  
542 *(versus never) smoking and (residualised and standardised) DNA methylation beta-values in*  
543 *each of the three MR-DoC models: bidirectional MR-DoC2, MR-DoC1 with horizontal*  
544 *pleiotropic path, and MR-DoC1 with unique environmental confounding (rE). The*  
545 *corresponding estimates for current (versus never) smoking are also shown with dashed lines.*  
546 *The text labels on the left indicate the CpG probe IDs and the genes mapped by the CpGs.*  
547 *Note. The data underlying these plots are in **Supplementary Tables S1 and S27**, indicated by the*  
548 *column `gl_robust`.*

549

## Discussion

550 The integrated MR and twin models suggest that the causal effects of cigarette smoking on blood  
551 DNAm likely underlie many of the associations seen in EWAS. Compared to a handful of CpGs  
552 causally linked with smoking in previous MR analyses, we found over 500 CpGs with consistent,  
553 nominally significant effects of current smoking on DNAm. These loci show broad enrichment  
554 for tissue types and functional pathways that implicate numerous well-established harmful health  
555 outcomes of smoking, including cell- and neuro-development, carcinogenesis, and immune  
556 regulation. The discovery of more extensive and novel causal effects may partly be attributable  
557 to the study design's ability to estimate the causal influences of *current* smoking specifically,  
558 given the considerable reversibility of most smoking-associated DNAm changes upon smoking  
559 cessation. Consistently, most of the estimated effects of smoking on DNAm were no longer  
560 significant in the analyses of former smoking. Additionally, several CpGs showed evidence of  
561 reverse and possibly bidirectional effects of DNAm on smoking liability, with a subset of these  
562 loci enriched for gene regulatory functional elements in the brain. The detection of reverse or  
563 bidirectional causal effects of blood DNAm on smoking highlights the potential utility of blood  
564 DNAm as a biomarker to monitor addiction or interventions.

565

566 Previous discordant-twin analyses in NTR found 13 CpGs with significant DNAm differences  
567 between MZ twins discordant for current smoking [24], suggesting potential causality. In the  
568 MR-DoC analyses, eight of the 13 CpGs showed robust evidence of current smoking's effects on  
569 DNAm, while none showed reverse effects. Taken together, these findings further triangulate the  
570 evidence for smoking's effects on DNAm at these sites. Prior summary-statistics-based MR  
571 analyses in GoDMC found no evidence of causal effects of lifetime smoking on DNAm, or *vice*  
572 *versa* [21]. Another study [10] applied a single MR method and found nominally significant  
573 effects of lifetime smoking on DNAm at 11 CpGs from the Illumina MethylationEPIC array  
574 [49], of which two (cg14580211, cg15212295) overlap with Illumina 450k array data used in the  
575 current study. In our MR-DoC analyses, only cg14580211 showed replication in the form of  
576 consistent negative causal estimates of current smoking on DNAm. Furthermore, the nine CpGs  
577 with previously reported reverse effects of DNAm on lifetime smoking behaviour in a single MR  
578 model [11] showed inconsistent estimates in the three MR-DoC models. Interestingly, two of  
579 these CpGs (cg09099830 and cg24033122; both in gene *ITGAL*) showed consistent, nominally  
580 significant effects of current smoking on DNAm, underscoring the need for further replication of  
581 both prior and current findings.

582

583 Of the three loci with robust evidence of DNAm's effects on current smoking liability, two are  
584 located in genes *GNG7* and *RGS3*, which are integral to G protein-coupled receptor (GPCR)  
585 signalling, adding to the growing literature on GPCR signalling pathways' potential role in

586 behavioural and neuropsychiatric outcomes [50]. Specifically, differential expression of both  
587 *GNG7* [51] and *RGS3* [52] has been associated with addiction-related phenotypes in model  
588 organisms. The third CpG annotates to *SLC15A4*, which encodes a lysosomal peptide/histidine  
589 transporter involved in antigen presentation and innate immune response [53], including in mast  
590 cells [54]. Thus, DNAm variation at this locus may reflect individual differences in  
591 immunological tolerance of cigarette smoke and, consequently, maintenance of smoking  
592 behaviour. Interestingly, these CpGs were significantly associated with neither cannabis use [7]  
593 nor alcohol consumption [6] in recent large-scale EWASs. However, these studies reported  
594 DNAm associations conditional on cigarette smoking, making them unsuitable for gauging  
595 whether the CpGs with putative effects on smoking liability are also associated with other  
596 substances. This raises the question of whether cigarette smoking should always be used as a  
597 covariate in EWAS. If so, it may be prudent to report supplementary EWAS results without  
598 smoking as a covariate, as some CpGs may have reverse or bidirectional causal relationships  
599 with smoking.

600  
601 Several factors need to be considered when interpreting the above results. We analysed DNAm  
602 from whole blood, but smoking's causal relationships with DNAm may differ between specific  
603 blood cell types. The results may also vary in other peripheral tissues, like buccal cells [55], and  
604 other tissues relevant to smoking, like the brain. Moreover, the highly variable predictive  
605 strength of mQTL allelic scores across CpGs (incremental- $R^2$  range: 0.43-76.95%; median  
606 4.61%) affected the power to detect causal effects of blood DNAm on smoking liability [38].  
607 When considering similar model applications across different health traits, this impact on power  
608 is relevant to both directions of causation, as the IV of other traits may not be as strong as the  
609 smoking PRS. Additionally, the Illumina 450k microarray used in this study covers a small  
610 fraction of genome-wide potential methylation sites. Moreover, many of the measured smoking-  
611 associated CpGs lacked a "relevant" mQTL allelic score with F-statistic  $>10$  (**Supplementary**  
612 **Figure S36**), and so have yet to be tested for *DNAm*  $\rightarrow$  *Smoking* causal effects. Newer low-cost  
613 sequencing technology [56] may facilitate further causal discovery in the future.

614  
615 Like all MR studies, the current results depend on the validity of the IV assumptions [28], which  
616 can be difficult to test. Here, we relied on the statistical significance and consistency of the  
617 causal estimates across different MR-DoC model specifications to account for potential  
618 assumption violations, particularly horizontal pleiotropy. Yet, we cannot rule out residual bias  
619 due to violations of the assumptions underlying MR [28] and twin modelling [57]. Moreover,  
620 current MR-DoC models estimated linear causal effects. However, since DNAm is constrained  
621 within certain biologically plausible values, the impact of smoking on DNAm may depend on  
622 *prior* DNAm. Further development of MR-DoC models with interaction or quadratic effects will

623 benefit the study of such non-linear causal effects. Finally, we examined causality using only  
624 binary smoking-status variables, as the number of individuals endorsing current or former  
625 smoking was too small to fit MR-DoC models to smoking quantity (e.g., cigarettes per day) or  
626 time since quitting. Further research with larger samples is needed to examine such dose-  
627 response causal relationships.

628  
629 The current study included participants of European ancestry only. Although prior EWASs show  
630 highly concordant associations across ancestries [2,58], examining the generalizability of causal  
631 estimates in non-European populations is an essential objective for further research. As MR-DoC  
632 models estimate causal effects specific to the target dataset, rather than the discovery GWAS  
633 samples, future research may apply this study design to subpopulations of interest, e.g., stratified  
634 by sex or age, provided the population-wide GWAS results generalise adequately. Future  
635 applications of MR-DoC analyses to DNAm data may also extend the current work to other traits  
636 that show robust associations with DNAm [59] and have strong genetic IVs.

637  
638 In conclusion, the inability to establish causality is a clear limitation of EWAS based on  
639 surrogate tissues such as blood. Here, we applied the MR-DoC designs to examine the causality  
640 between cigarette smoking and blood DNAm. The results suggest that many of the EWAS  
641 associations are likely driven by the causal effects of current smoking on DNAm, and provide  
642 evidence for reverse and potentially bidirectional causal relationships at some sites.

643 Underscoring the continuing value of twin studies for health and behaviour [60], our study  
644 highlights the value of integrating DNAm, phenotypic information, and genetic data in twin  
645 studies to uncover causal relationships of peripheral blood DNAm with complex traits. This  
646 study design might be valuable for detecting causal epigenetic biomarkers of mental health in  
647 general.

648

649

## References

650

- 651 1. Wei S, Tao J, Xu J, Chen X, Wang Z, Zhang N, et al. Ten Years of EWAS. *Adv Sci*. 2021  
652 Oct 1;8(20):2100727.
- 653 2. Joehanes R, Just AC, Marioni R, Pilling L, Reynolds L, Mandaviya PR, et al. Epigenetic  
654 Signatures of Cigarette Smoking. *Circ Cardiovasc Genet*. 2016;9(5):436–47.
- 655 3. Lawlor DA, Harbord RM, Sterne JA, Timpson N, Davey Smith G. Mendelian  
656 randomization: using genes as instruments for making causal inferences in epidemiology.  
657 *Stat Med*. 2008 Apr 15;27(8):1133–63.
- 658 4. Zillich L, Poisel E, Streit F, Frank J, Fries GR, Foo JC, et al. Epigenetic Signatures of  
659 Smoking in Five Brain Regions. *J Pers Med*. 2022;12(4):566.
- 660 5. Hannon E, Dempster E, Viana J, Burrage J, Smith AR, Macdonald R, et al. An integrated  
661 genetic-epigenetic analysis of schizophrenia: evidence for co-localization of genetic  
662 associations and differential DNA methylation. *Genome Biol*. 2016 Aug 30;17(1):176.
- 663 6. Dugué PA, Wilson R, Lehne B, Jayasekara H, Wang X, Jung CH, et al. Alcohol  
664 consumption is associated with widespread changes in blood DNA methylation: Analysis of  
665 cross-sectional and longitudinal data. *Addict Biol*. 2021 Jan 1;26(1):e12855.
- 666 7. Nannini DR, Zheng Y, Joyce BT, Kim K, Gao T, Wang J, et al. Genome-wide DNA  
667 methylation association study of recent and cumulative marijuana use in middle aged  
668 adults. *Mol Psychiatry* [Internet]. 2023 May 31; Available from:  
669 <https://doi.org/10.1038/s41380-023-02106-y>
- 670 8. Dhana K, Braun KVE, Nano J, Voortman T, Demerath EW, Guan W, et al. An Epigenome-  
671 Wide Association Study of Obesity-Related Traits. *Am J Epidemiol*. 2018 Aug  
672 1;187(8):1662–9.
- 673 9. Davey Smith G, Ebrahim S. Mendelian randomization: Can genetic epidemiology  
674 contribute to understanding environmental determinants of disease? *Int J Epidemiol*. 2003  
675 Feb;32(1):1–22.
- 676 10. Sun YQ, Richmond RC, Suderman M, Min JL, Battram T, Flatberg A, et al. Assessing the  
677 role of genome-wide DNA methylation between smoking and risk of lung cancer using  
678 repeated measurements: the HUNT study. *Int J Epidemiol*. 2021;50(5):1482–97.
- 679 11. Jamieson E, Korologou-Linden R, Wootton RE, Guyatt AL, Battram T, Burrows K, et al.  
680 Smoking, DNA Methylation, and Lung Function: A Mendelian Randomization Analysis to  
681 Investigate Causal Pathways. *Am J Hum Genet*. 2020 Mar 5;106(3):315–26.
- 682 12. Burgess S, Thompson SG, CRP CHD Genetics Collaboration. Avoiding bias from weak  
683 instruments in Mendelian randomization studies. *Int J Epidemiol*. 2011 Jun;40(3):755–64.
- 684 13. Dugué PA, Jung CH, Joo JE, Wang X, Wong EM, Makalic E, et al. Smoking and blood  
685 DNA methylation: an epigenome-wide association study and assessment of reversibility.  
686 *Epigenetics*. 2020 Apr 2;15(4):358–68.
- 687 14. Heath AC, Kessler RC, Neale MC, Hewitt JK, Eaves LJ, Kendler KS. Testing hypotheses  
688 about direction of causation using cross-sectional family data. *Behav Genet*. 1993 Jan  
689 1;23(1):29–50.
- 690 15. Minică CC, Dolan CV, Boomsma DI, De Geus E, Neale MC. Extending Causality Tests  
691 with Genetic Instruments: An Integration of Mendelian Randomization with the Classical  
692 Twin Design. *Behav Genet*. 2018;48(4):337–49.
- 693 16. Castro-de-Araujo LFS, Singh M, Zhou Y, Vinh P, Verhulst B, Dolan CV, et al. MR-DoC2:



- 694 Bidirectional Causal Modeling with Instrumental Variables and Data from Relatives. *Behav*  
695 *Genet.* 2023 Feb 1;53(1):63–73.
- 696 17. Minică CC, Boomsma DI, Dolan CV, De Geus E, Neale MC. Empirical comparisons of  
697 multiple Mendelian randomization approaches in the presence of assortative mating. *Int J*  
698 *Epidemiol.* 2020 Aug 1;49(4):1185–93.
- 699 18. Ligthart L, van Beijsterveldt CEM, Kevenaar ST, de Zeeuw E, van Bergen E, Bruins S, et  
700 al. The Netherlands Twin Register: Longitudinal Research Based on Twin and Twin-  
701 Family Designs. *Twin Res Hum Genet.* 2019;22(6):623–36.
- 702 19. Willemsen G, de Geus EJC, Bartels M, van Beijsterveldt CEMT, Brooks AI, Estourgie-van  
703 Burk GF, et al. The Netherlands Twin Register Biobank: A Resource for Genetic  
704 Epidemiological Studies. *Twin Res Hum Genet.* 2012/02/21 ed. 2010;13(3):231–45.
- 705 20. Singh M, Verhulst B, Vinh P, Zhou Y (Daniel), Castro-de-Araujo LFS, Hottenga JJ, et al.  
706 Using Instrumental Variables to Measure Causation over Time in Cross-Lagged Panel  
707 Models. *Multivar Behav Res.* 2024 Feb 15;59(2):342–70.
- 708 21. Min JL, Hemani G, Hannon E, Dekkers KF, Castillo-Fernandez J, Luijk R, et al. Genomic  
709 and phenotypic insights from an atlas of genetic effects on DNA methylation. *Nat Genet.*  
710 2021 Sep 1;53(9):1311–21.
- 711 22. Bibikova M, Barnes B, Tsan C, Ho V, Klotzle B, Le JM, et al. High density DNA  
712 methylation array with single CpG site resolution. *New Genomic Technol Appl.* 2011 Oct  
713 1;98(4):288–95.
- 714 23. van Dongen J, Nivard MG, Willemsen G, Hottenga JJ, Helmer Q, Dolan CV, et al. Genetic  
715 and environmental influences interact with age and sex in shaping the human methylome.  
716 *Nat Commun.* 2016 Sep 1;7(1):11115.
- 717 24. van Dongen J, Willemsen G, BIOS Consortium, de Geus EJ, Boomsma DI, Neale MC.  
718 Effects of smoking on genome-wide DNA methylation profiles: A study of discordant and  
719 concordant monozygotic twin pairs. Aldrich M, Rathmell WK, Aldrich M, Craig J, Kaprio  
720 J, editors. *eLife.* 2023 Aug 10;12:e83286.
- 721 25. Chang CC, Chow CC, Tellier LC, Vattikuti S, Purcell SM, Lee JJ. Second-generation  
722 PLINK: rising to the challenge of larger and richer datasets. *GigaScience.* 2015 Dec 1;4(1).
- 723 26. Vilhjálmsson J, Yang J, Finucane K, Gusev A, Lindström S, Ripke S, et al. Modeling  
724 Linkage Disequilibrium Increases Accuracy of Polygenic Risk Scores. *Am J Hum Genet.*  
725 2015 Oct 1;97(4):576–92.
- 726 27. Saunders GRB, Wang X, Chen F, Jang SK, Liu M, Wang C, et al. Genetic diversity fuels  
727 gene discovery for tobacco and alcohol use. *Nature.* 2022 Dec 22;612(7941):720–4.
- 728 28. Richmond RC, Davey Smith G. Mendelian Randomization: Concepts and Scope. *Cold*  
729 *Spring Harb Perspect Med.* 2022 Jan 1;12(1):a040501.
- 730 29. Neale MC, Hunter MD, Pritikin JN, Zahery M, Brick TR, Kirkpatrick RM, et al. OpenMx  
731 2.0: Extended Structural Equation and Statistical Modeling. *Psychometrika.*  
732 2016;81(2):535–49.
- 733 30. Verhulst B, Neale MC. Best Practices for Binary and Ordinal Data Analyses. *Behav Genet.*  
734 2021;51(3):204–14.
- 735 31. van Iterson M, van Zwet EW, Heijmans BT, the BIOS Consortium. Controlling bias and  
736 inflation in epigenome- and transcriptome-wide association studies using the empirical null  
737 distribution. *Genome Biol.* 2017 Jan 27;18(1):19.
- 738 32. Gogarten SM, Bhangale T, Conomos MP, Laurie CA, McHugh CP, Painter I, et al.  
739 GWASTools: an R/Bioconductor package for quality control and analysis of genome-wide

- 740 association studies. *Bioinformatics*. 2012 Dec 1;28(24):3329–31.
- 741 33. Benjamini Y, Hochberg Y. Controlling the False Discovery Rate: A Practical and Powerful  
742 Approach to Multiple Testing. *J R Stat Soc Ser B Methodol*. 1995 Jan 1;57(1):289–300.
- 743 34. Zhou Y, Zhou B, Pache L, Chang M, Khodabakhshi AH, Tanaseichuk O, et al. Metascape  
744 provides a biologist-oriented resource for the analysis of systems-level datasets. *Nat*  
745 *Commun*. 2019 Apr 3;10(1).
- 746 35. Breeze CE, Paul DS, van Dongen J, Butcher LM, Ambrose JC, Barrett JE, et al. eFORGE:  
747 A Tool for Identifying Cell Type-Specific Signal in Epigenomic Data. *Cell Rep*. 2016 Nov  
748 15;17(8):2137–50.
- 749 36. Breeze CE, Reynolds AP, van Dongen J, Dunham I, Lazar J, Neph S, et al. eFORGE v2.0:  
750 updated analysis of cell type-specific signal in epigenomic data. *Bioinformatics*. 2019 Nov  
751 15;35(22):4767–9.
- 752 37. Breeze CE. Cell Type-Specific Signal Analysis in Epigenome-Wide Association Studies.  
753 In: Guan W, editor. *Epigenome-Wide Association Studies: Methods and Protocols*  
754 [Internet]. New York, NY: Springer US; 2022. p. 57–71. Available from:  
755 [https://doi.org/10.1007/978-1-0716-1994-0\\_5](https://doi.org/10.1007/978-1-0716-1994-0_5)
- 756 38. Castro-de-Araujo LF, Singh M, Zhou Y, Vinh P, Maes HH, Verhulst B, et al. Power,  
757 measurement error, and pleiotropy robustness in twin-design extensions to Mendelian  
758 Randomization. *Research square*. United States; 2023. p. rs.3.rs-3411642.
- 759 39. Edenberg HJ, Koller DL, Xuei X, Wetherill L, McClintick JN, Almasy L, et al. Genome-  
760 Wide Association Study of Alcohol Dependence Implicates a Region on Chromosome 11.  
761 *Alcohol Clin Exp Res*. 2010 May 1;34(5):840–52.
- 762 40. Khan AH, Bagley JR, LaPierre N, Gonzalez-Figueroa C, Spencer TC, Choudhury M, et al.  
763 Genetic pathways regulating the longitudinal acquisition of cocaine self-administration in a  
764 panel of inbred and recombinant inbred mice. *Cell Rep*. 2023 Aug 29;42(8):112856.
- 765 41. Jin X, Dong S, Yang Y, Bao G, Ma H. Nominating novel proteins for anxiety via  
766 integrating human brain proteomes and genome-wide association study. *J Affect Disord*.  
767 2024 Aug 1;358:129–37.
- 768 42. Sarkar A, Chachra P, Kennedy P, Pena CJ, Desouza LA, Nestler EJ, et al. Hippocampal  
769 HDAC4 Contributes to Postnatal Fluoxetine-Evoked Depression-Like Behavior.  
770 *Neuropsychopharmacology*. 2014 Aug 1;39(9):2221–32.
- 771 43. Aldosary M, Baselm S, Abdulrahim M, Almass R, Alsagob M, AlMasseri Z, et al.  
772 SLC25A42-associated mitochondrial encephalomyopathy: Report of additional founder  
773 cases and functional characterization of a novel deletion. *JIMD Rep*. 2021 Jul 1;60(1):75–  
774 87.
- 775 44. Stankiewicz AM, Jaszczyk A, Goscik J, Juszcak GR. Stress and the brain transcriptome:  
776 Identifying commonalities and clusters in standardized data from published experiments.  
777 *Prog Neuropsychopharmacol Biol Psychiatry*. 2022 Dec 20;119:110558.
- 778 45. Cochran JN, Acosta-Urbe J, Esposito BT, Madrigal L, Aguillón D, Giraldo MM, et al.  
779 Genetic associations with age at dementia onset in the PSEN1 E280A Colombian kindred.  
780 *Alzheimers Dement*. 2023 Sep 1;19(9):3835–47.
- 781 46. Mahajan UV, Varma VR, Griswold ME, Blackshear CT, An Y, Oommen AM, et al.  
782 Dysregulation of multiple metabolic networks related to brain transmethylation and  
783 polyamine pathways in Alzheimer disease: A targeted metabolomic and transcriptomic  
784 study. *PLOS Med*. 2020 Jan 24;17(1):e1003012.
- 785 47. Blanco-Luquin I, Acha B, Urdánoz-Casado A, Sánchez-Ruiz De Gordo J, Vicuña-Urriza J,

- 786 Roldán M, et al. Early epigenetic changes of Alzheimer’s disease in the human  
787 hippocampus. *Epigenetics*. 2020 Oct 2;15(10):1083–92.
- 788 48. Vuckovic D, Bao EL, Akbari P, Lareau CA, Mousas A, Jiang T, et al. The Polygenic and  
789 Monogenic Basis of Blood Traits and Diseases. *Cell*. 2020 Sep 3;182(5):1214-1231.e11.
- 790 49. Pidsley R, Zotenko E, Peters TJ, Lawrence MG, Risbridger GP, Molloy P, et al. Critical  
791 evaluation of the Illumina MethylationEPIC BeadChip microarray for whole-genome DNA  
792 methylation profiling. *Genome Biol*. 2016 Oct 7;17(1):208.
- 793 50. Wong TS, Li G, Li S, Gao W, Chen G, Gan S, et al. G protein-coupled receptors in  
794 neurodegenerative diseases and psychiatric disorders. *Signal Transduct Target Ther*. 2023  
795 May 3;8(1):177.
- 796 51. Stankiewicz AM, Goscik J, Dyr W, Juszcak GR, Ryglewicz D, Swiergiel AH, et al. Novel  
797 candidate genes for alcoholism — transcriptomic analysis of prefrontal medial cortex,  
798 hippocampus and nucleus accumbens of Warsaw alcohol-preferring and non-preferring rats.  
799 *Pharmacol Biochem Behav*. 2015 Dec 1;139:27–38.
- 800 52. Burchett SA, Bannon MJ, Granneman JG. RGS mRNA Expression in Rat Striatum. *J*  
801 *Neurochem*. 1999 Apr 1;72(4):1529–33.
- 802 53. Chen X, Xie M, Zhang S, Monguió-Tortajada M, Yin J, Liu C, et al. Structural basis for  
803 recruitment of TASL by SLC15A4 in human endolysosomal TLR signaling. *Nat Commun*.  
804 2023 Oct 20;14(1):6627.
- 805 54. Kobayashi T, Tsutsui H, Shimabukuro-Demoto S, Yoshida-Sugitani R, Karyu H,  
806 Furuyama-Tanaka K, et al. Lysosome biogenesis regulated by the amino-acid transporter  
807 SLC15A4 is critical for functional integrity of mast cells. *Int Immunol*. 2017 Dec  
808 31;29(12):551–66.
- 809 55. Teschendorff AE, Yang Z, Wong A, Pipinikas CP, Jiao Y, Jones A, et al. Correlation of  
810 Smoking-Associated DNA Methylation Changes in Buccal Cells With DNA Methylation  
811 Changes in Epithelial Cancer. *JAMA Oncol*. 2015 Jul 1;1(4):476–85.
- 812 56. Simpson JT, Workman RE, Zuzarte PC, David M, Dursi LJ, Timp W. Detecting DNA  
813 cytosine methylation using nanopore sequencing. *Nat Methods*. 2017 Apr 1;14(4):407–10.
- 814 57. Evans DM, Gillespie NA, Martin NG. Biometrical genetics. *Biol Psychol*. 2002;61(1):33–  
815 51.
- 816 58. Fang F, Quach B, Lawrence KG, van Dongen J, Marks JA, Lundgren S, et al. Trans-  
817 ancestry epigenome-wide association meta-analysis of DNA methylation with lifetime  
818 cannabis use. *Mol Psychiatry* [Internet]. 2023 Nov 7; Available from:  
819 <https://doi.org/10.1038/s41380-023-02310-w>
- 820 59. Jin Z, Liu Y. DNA methylation in human diseases. *Genes Dis*. 2018 Mar 1;5(1):1–8.
- 821 60. Hagenbeek FA, Hirzinger JS, Breunig S, Bruins S, Kuznetsov DV, Schut K, et al.  
822 Maximizing the value of twin studies in health and behaviour. *Nat Hum Behav*. 2023 Jun  
823 1;7(6):849–60.
- 824

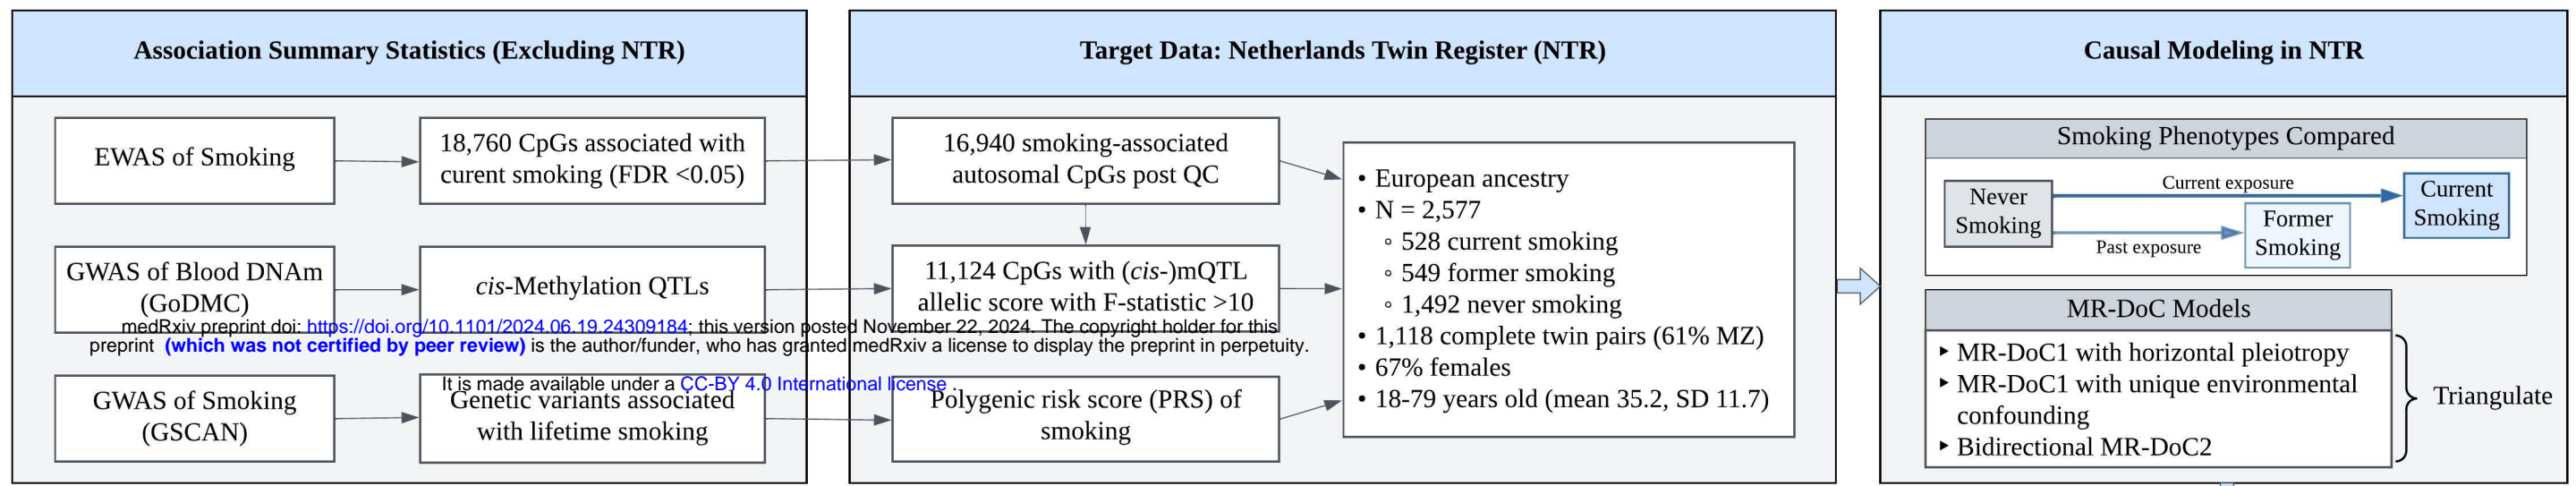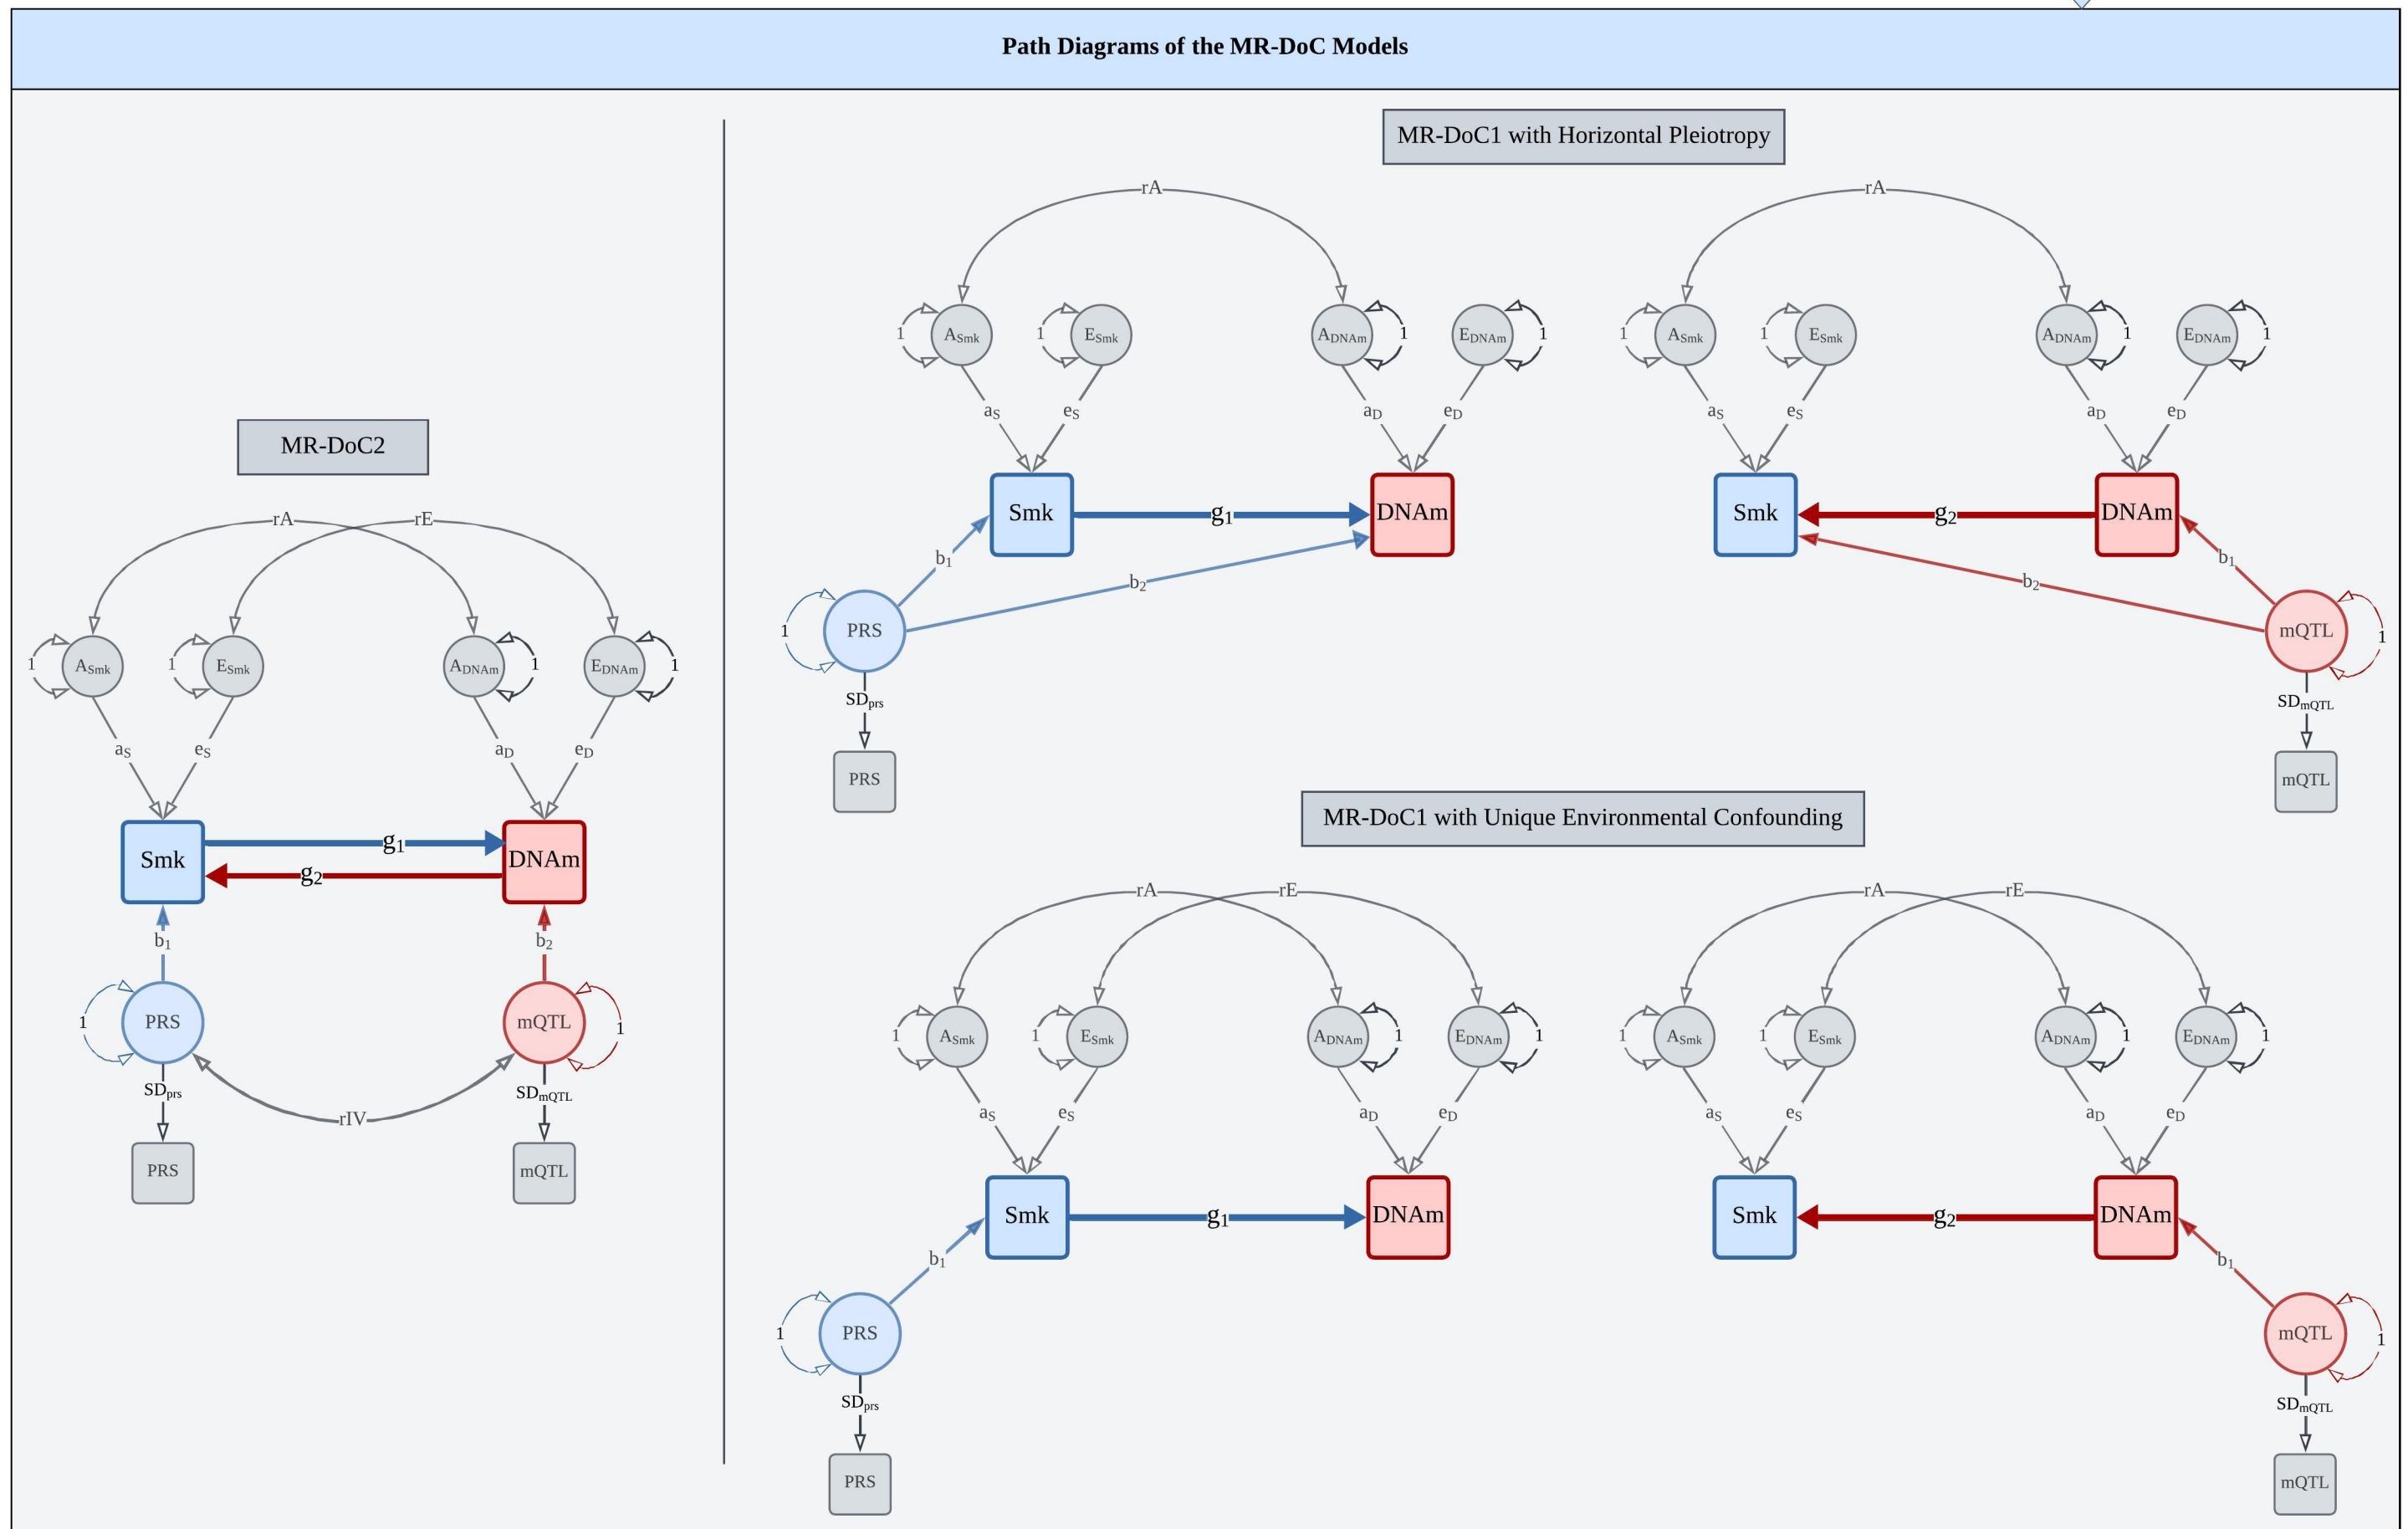

18,760 CpG sites associated with current versus never smoking (“smoking-associated”) and 2,568 CpG sites associated with former versus never smoking (“former-smoking-associated”) in an independent EWAS meta-analysis

Autosomal CpG sites passing the QC metrics in the Netherlands Twin Register

**Smoking → DNAm (Unidirectional MR-DoC1)**

16,940 (90.3%) smoking-associated CpG sites

2,330 (90.7%) former-smoking-associated CpG sites

13,275 smoking-associated CpG sites had mQTL summary statistics available from the Genetics of DNA Methylation Consortium (GoDMC). 12,940 of these sites had summary statistics for *cis*-mQTLs.

CpG sites filtered for mQTL allelic score with F-statistic >10

**DNAm → Smoking (Unidirectional MR-DoC1) and Bidirectional MR-DoC2 models**

11,124 (65.7%) smoking-associated CpG sites

1,782 (76.5%) former-smoking-associated CpG sites

# Putative Causal Effects of Current Smoking on DNA Methylation in MR-DoC Models

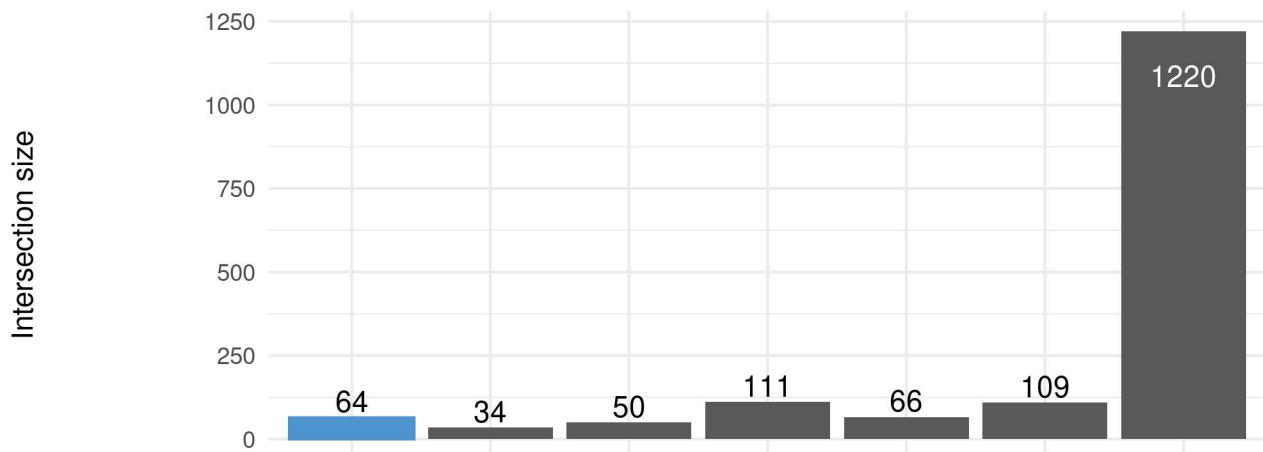

## Putative Causal Effects of Current Smoking on DNA Methylation FDR < 0.05

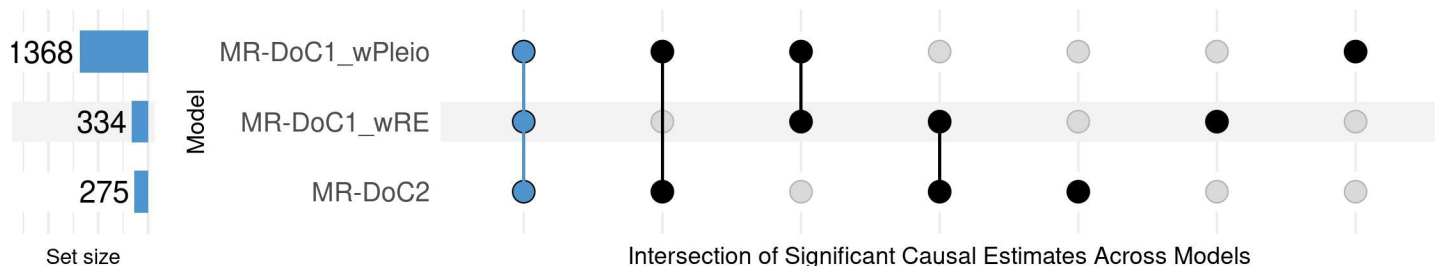

## Causal Estimates

From MR-DoC1 Model with rE

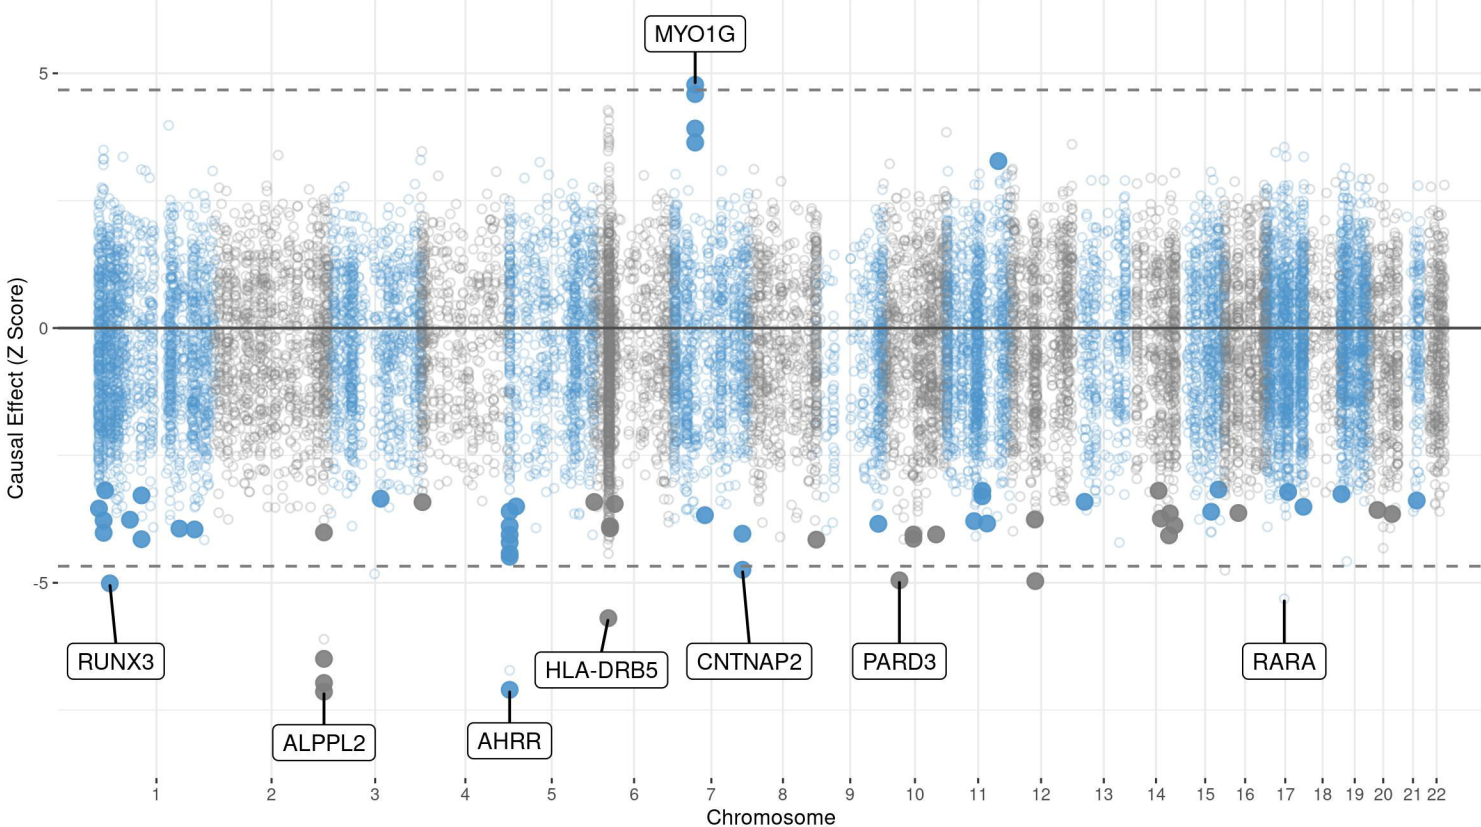

Solid Points indicate the 64 sites significant at FDR < 0.05 in all three models  
Labeled Points indicate the 14 sites significant after Bonferroni correction in more than one model

A. Causal Estimates of DNAm's Effects on Current Smoking

CpGs with FDR < 0.05 in All Three Models

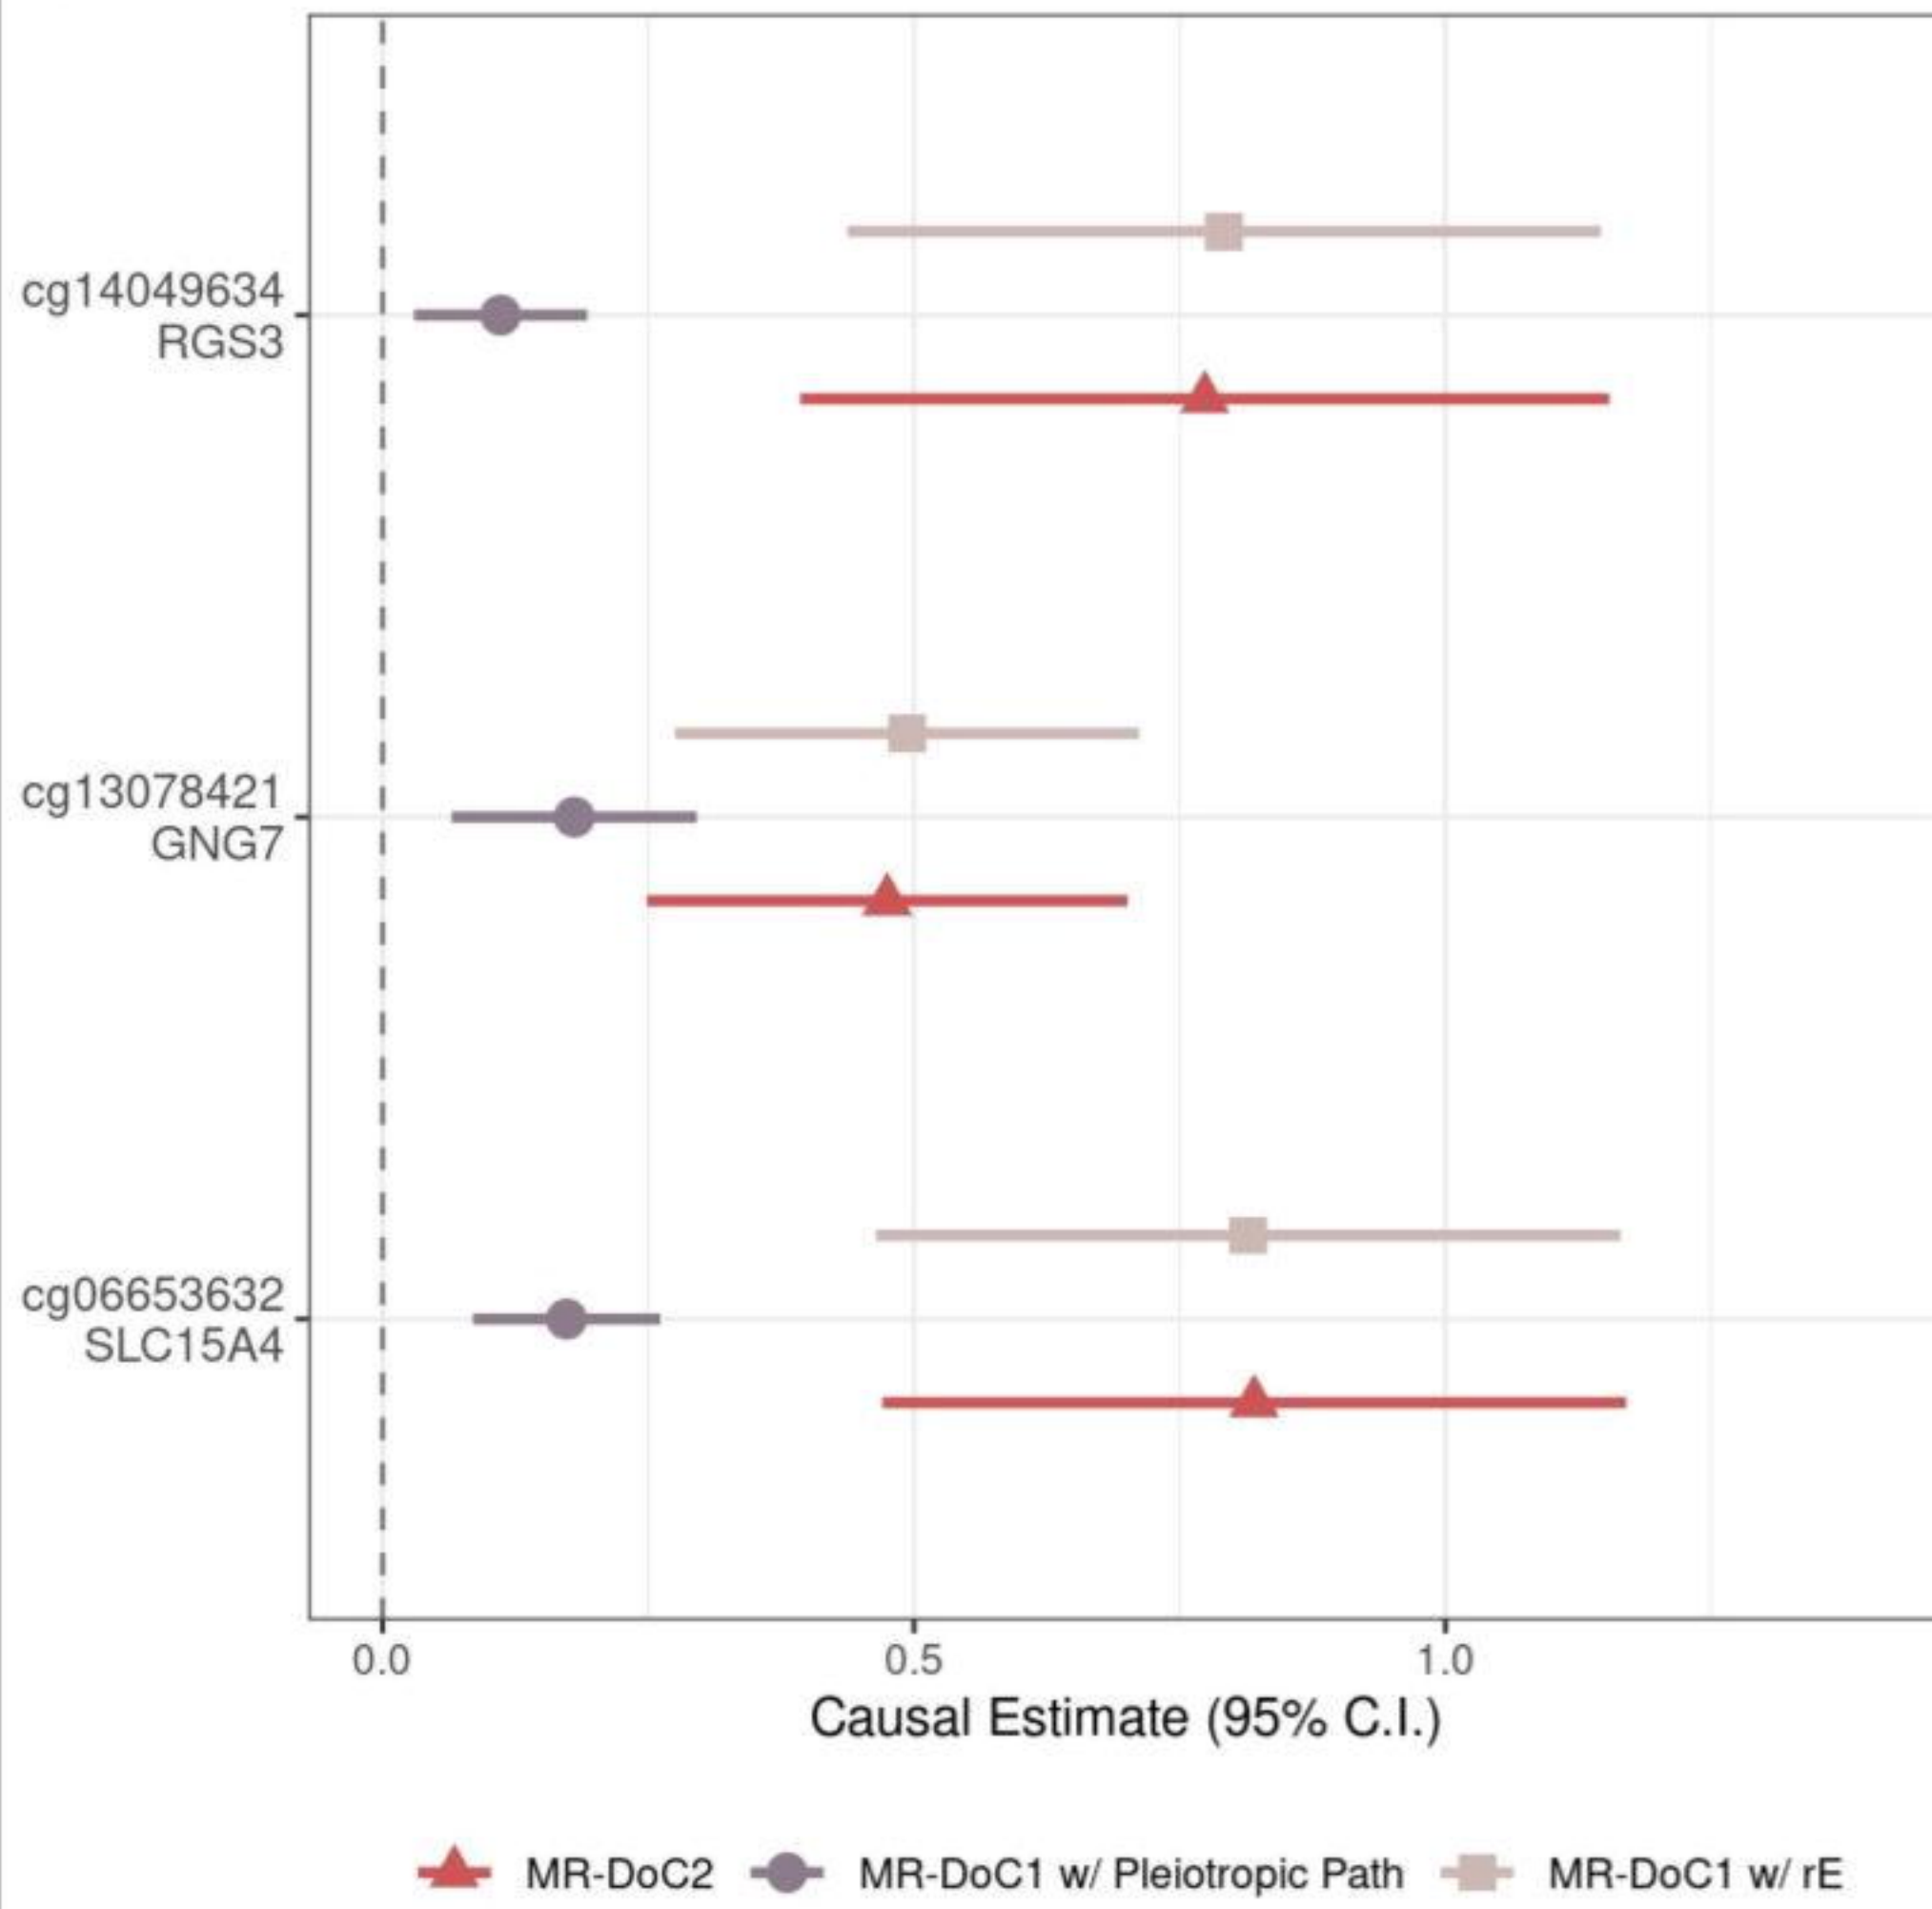

Intersection size

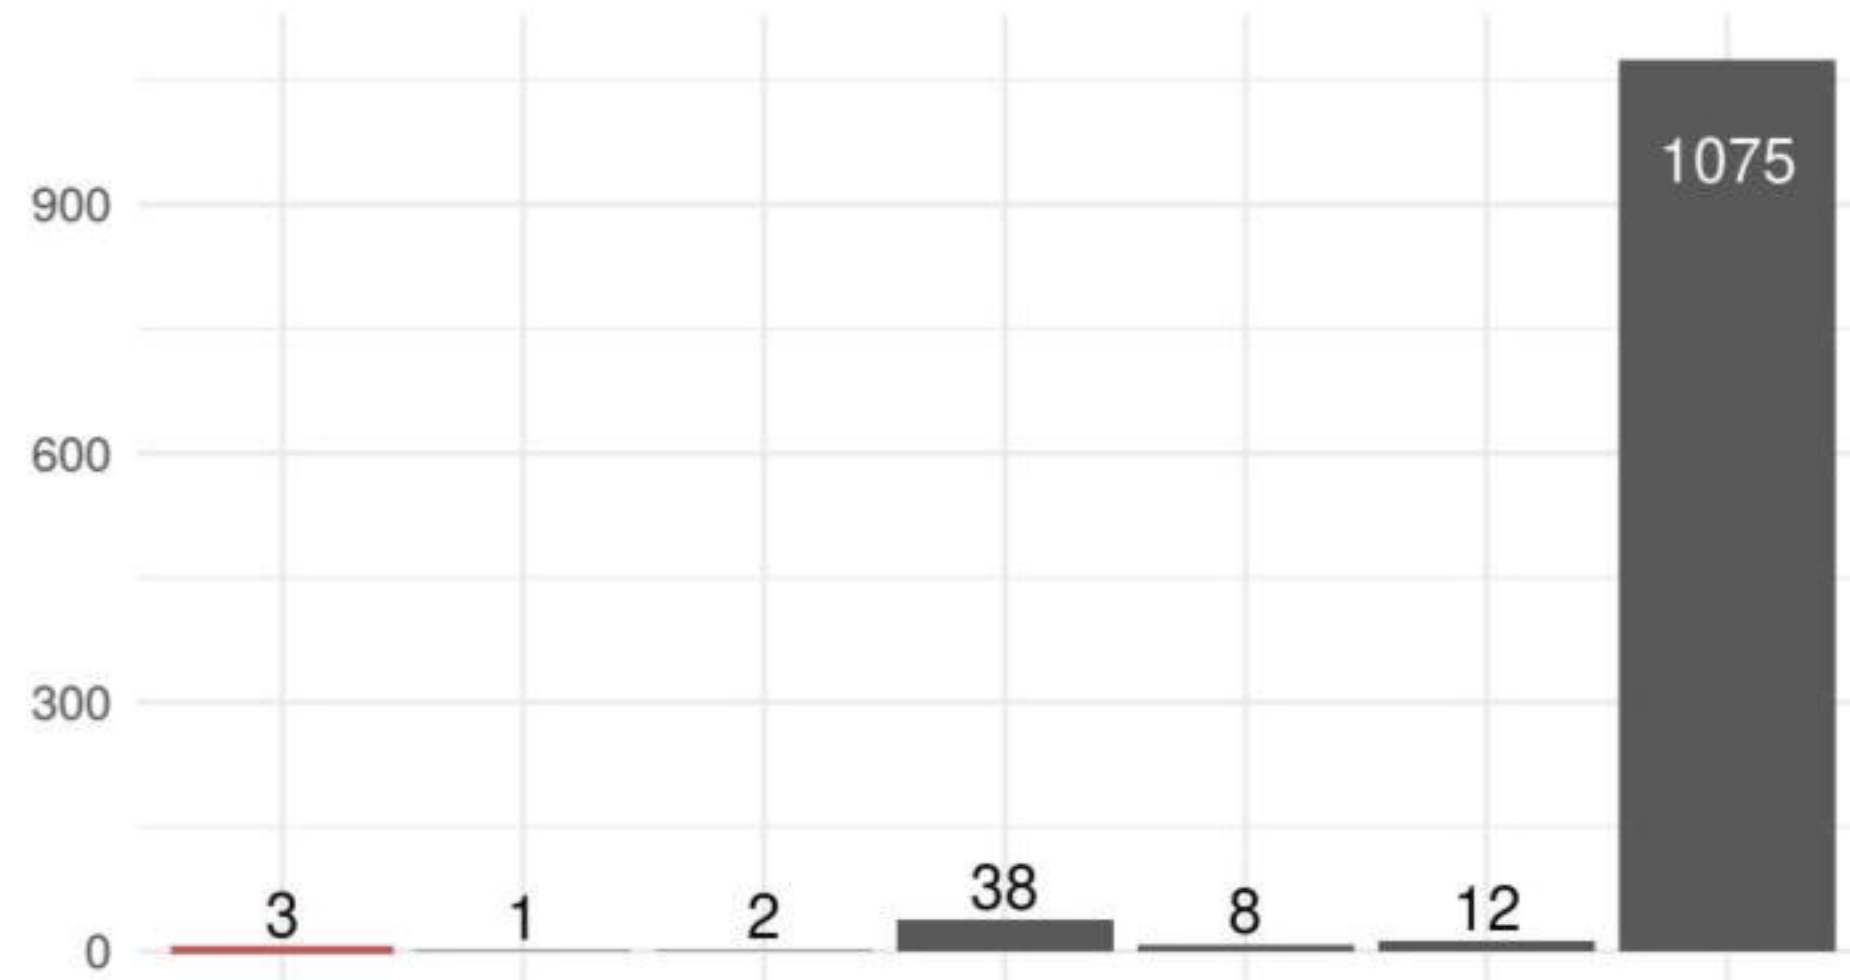

B. Putative Effects of DNA Methylation on Current Smoking  
FDR < 0.05

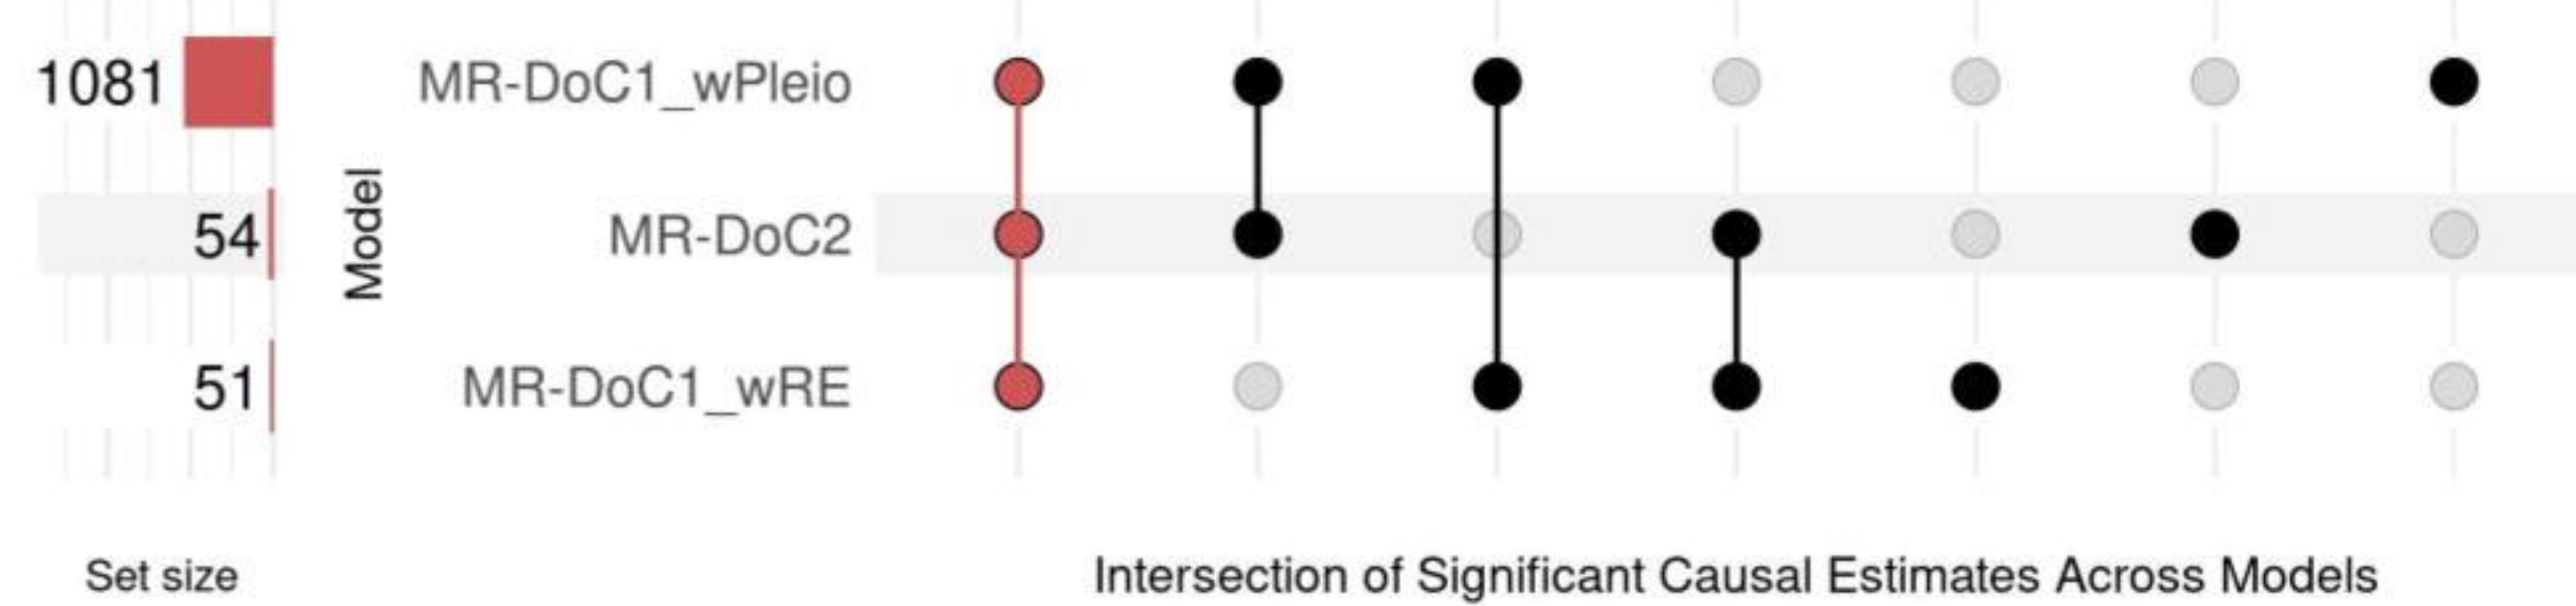

C. Suggestive Bidirectional Causal Effects between Current Smoking and Blood DNA Methylation

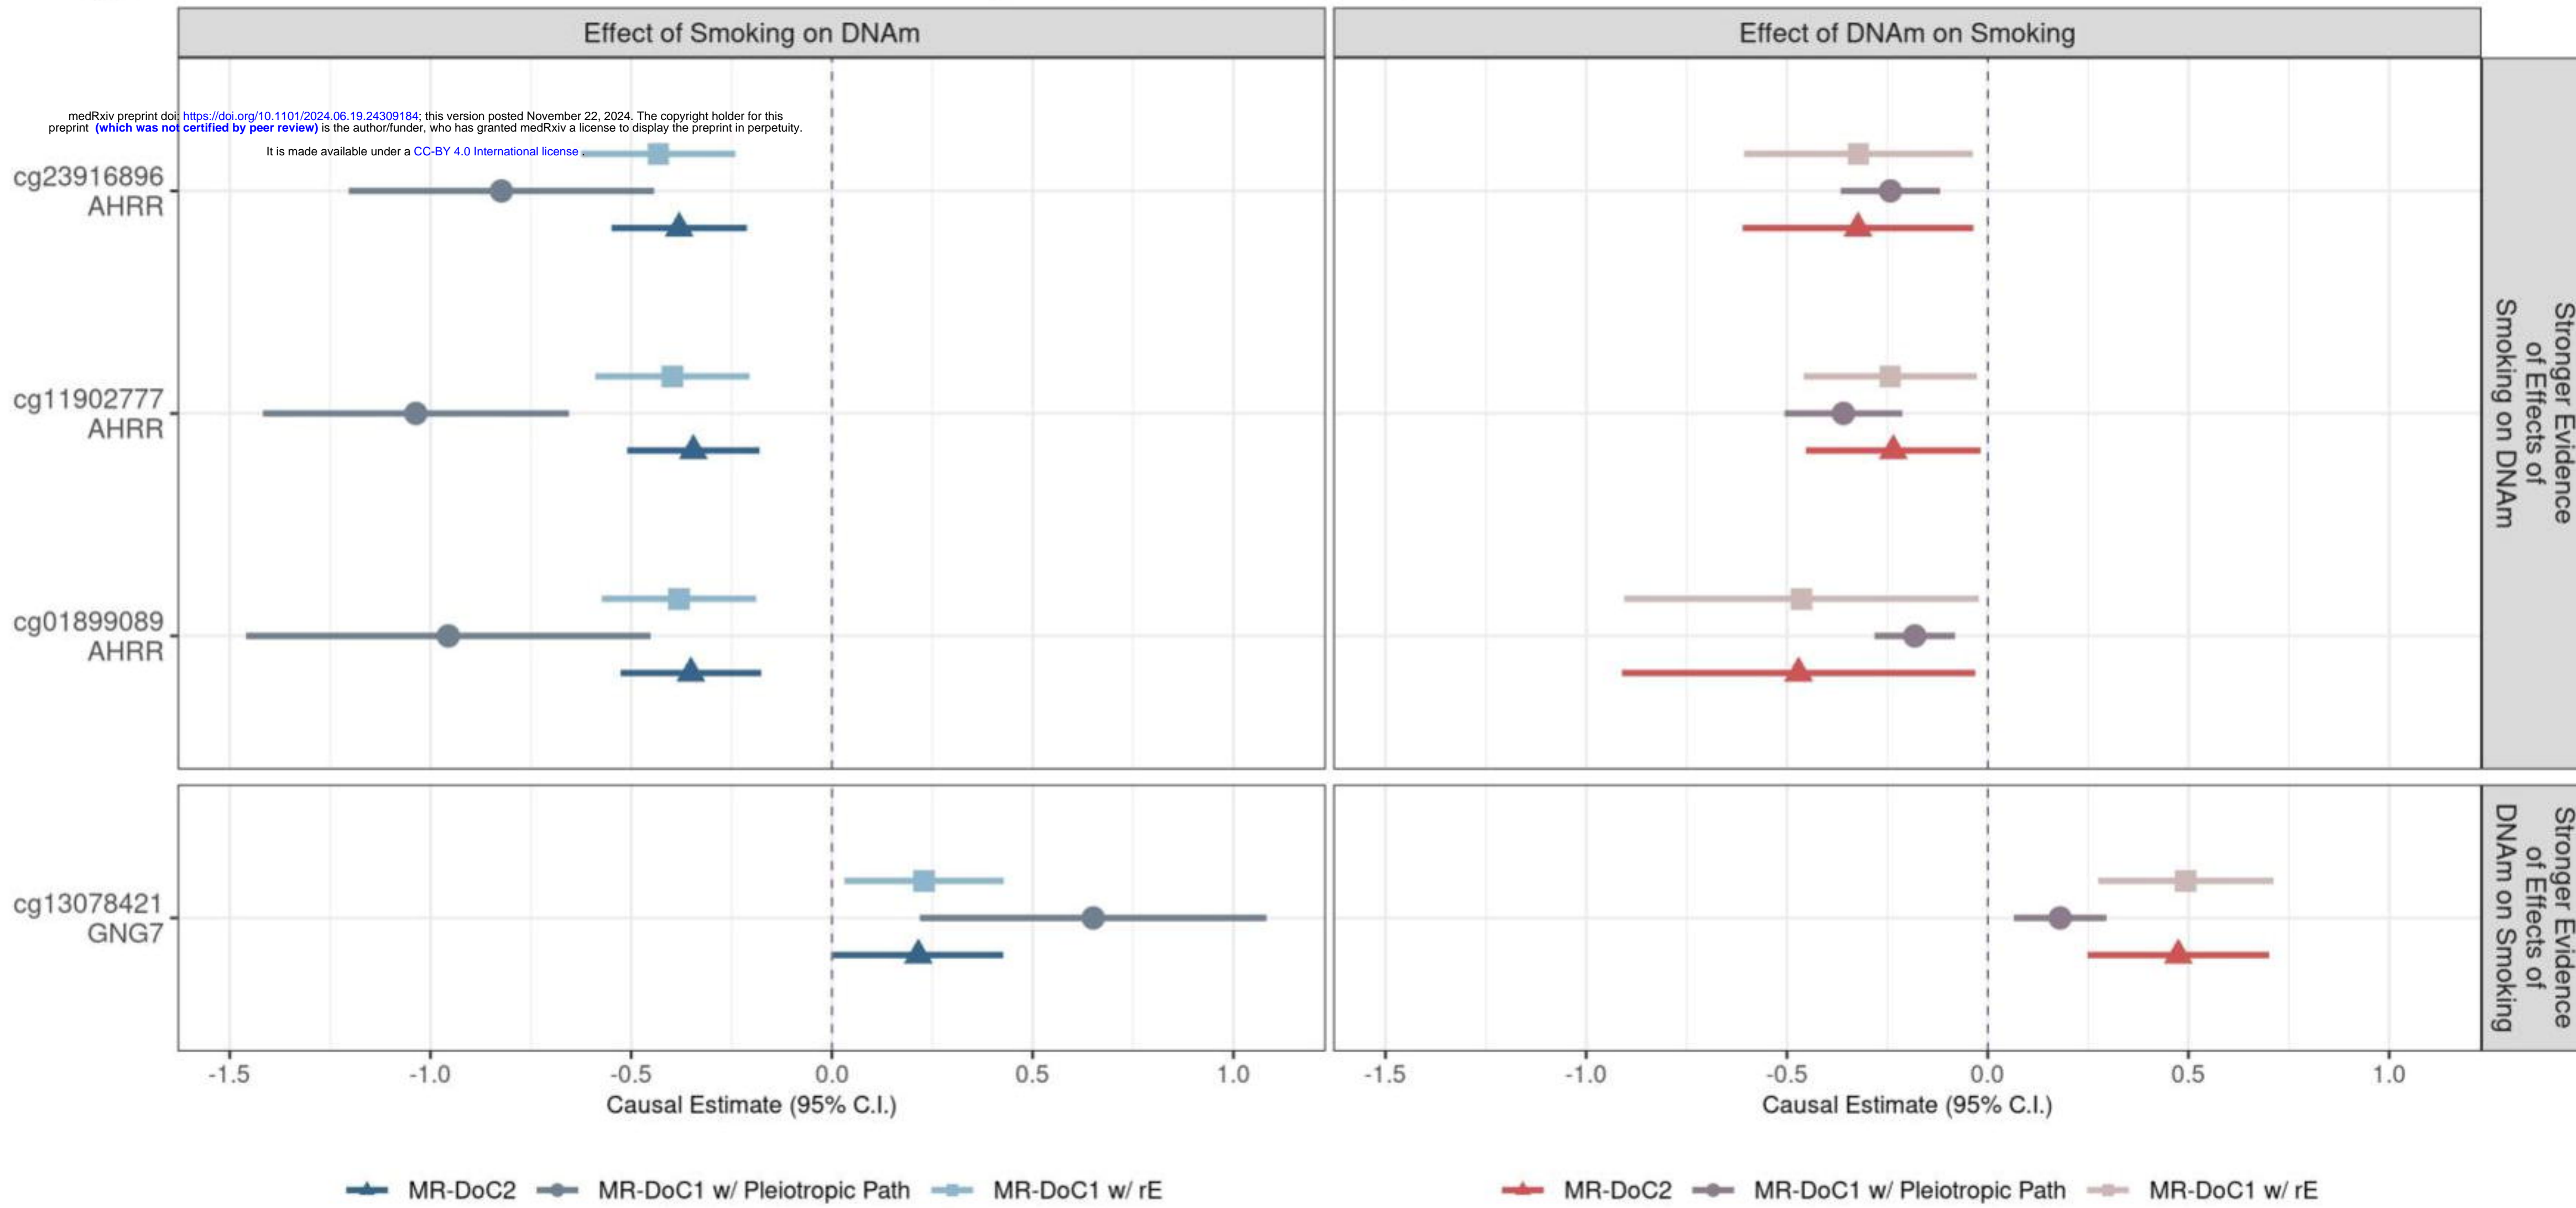

medRxiv preprint doi: <https://doi.org/10.1101/2024.06.19.24309184>; this version posted November 22, 2024. The copyright holder for this preprint (which was not certified by peer review) is the author/funder, who has granted medRxiv a license to display the preprint in perpetuity. It is made available under a [CC-BY 4.0 International license](https://creativecommons.org/licenses/by/4.0/).

# eFORGE Analyses of the CpG Sites with Potential Effects of DNA Methylation on Current Smoking

64 CpG sites with potential effects of DNA methylation on current smoking

eFORGE Iteration 1

21 CpG sites enriched for overlap with Enhancers in the Fetal Brain samples

eFORGE Iteration 2

17 CpG sites enriched for overlap with H3K4me3 in the Fetal Brain samples

eFORGE Iteration 3

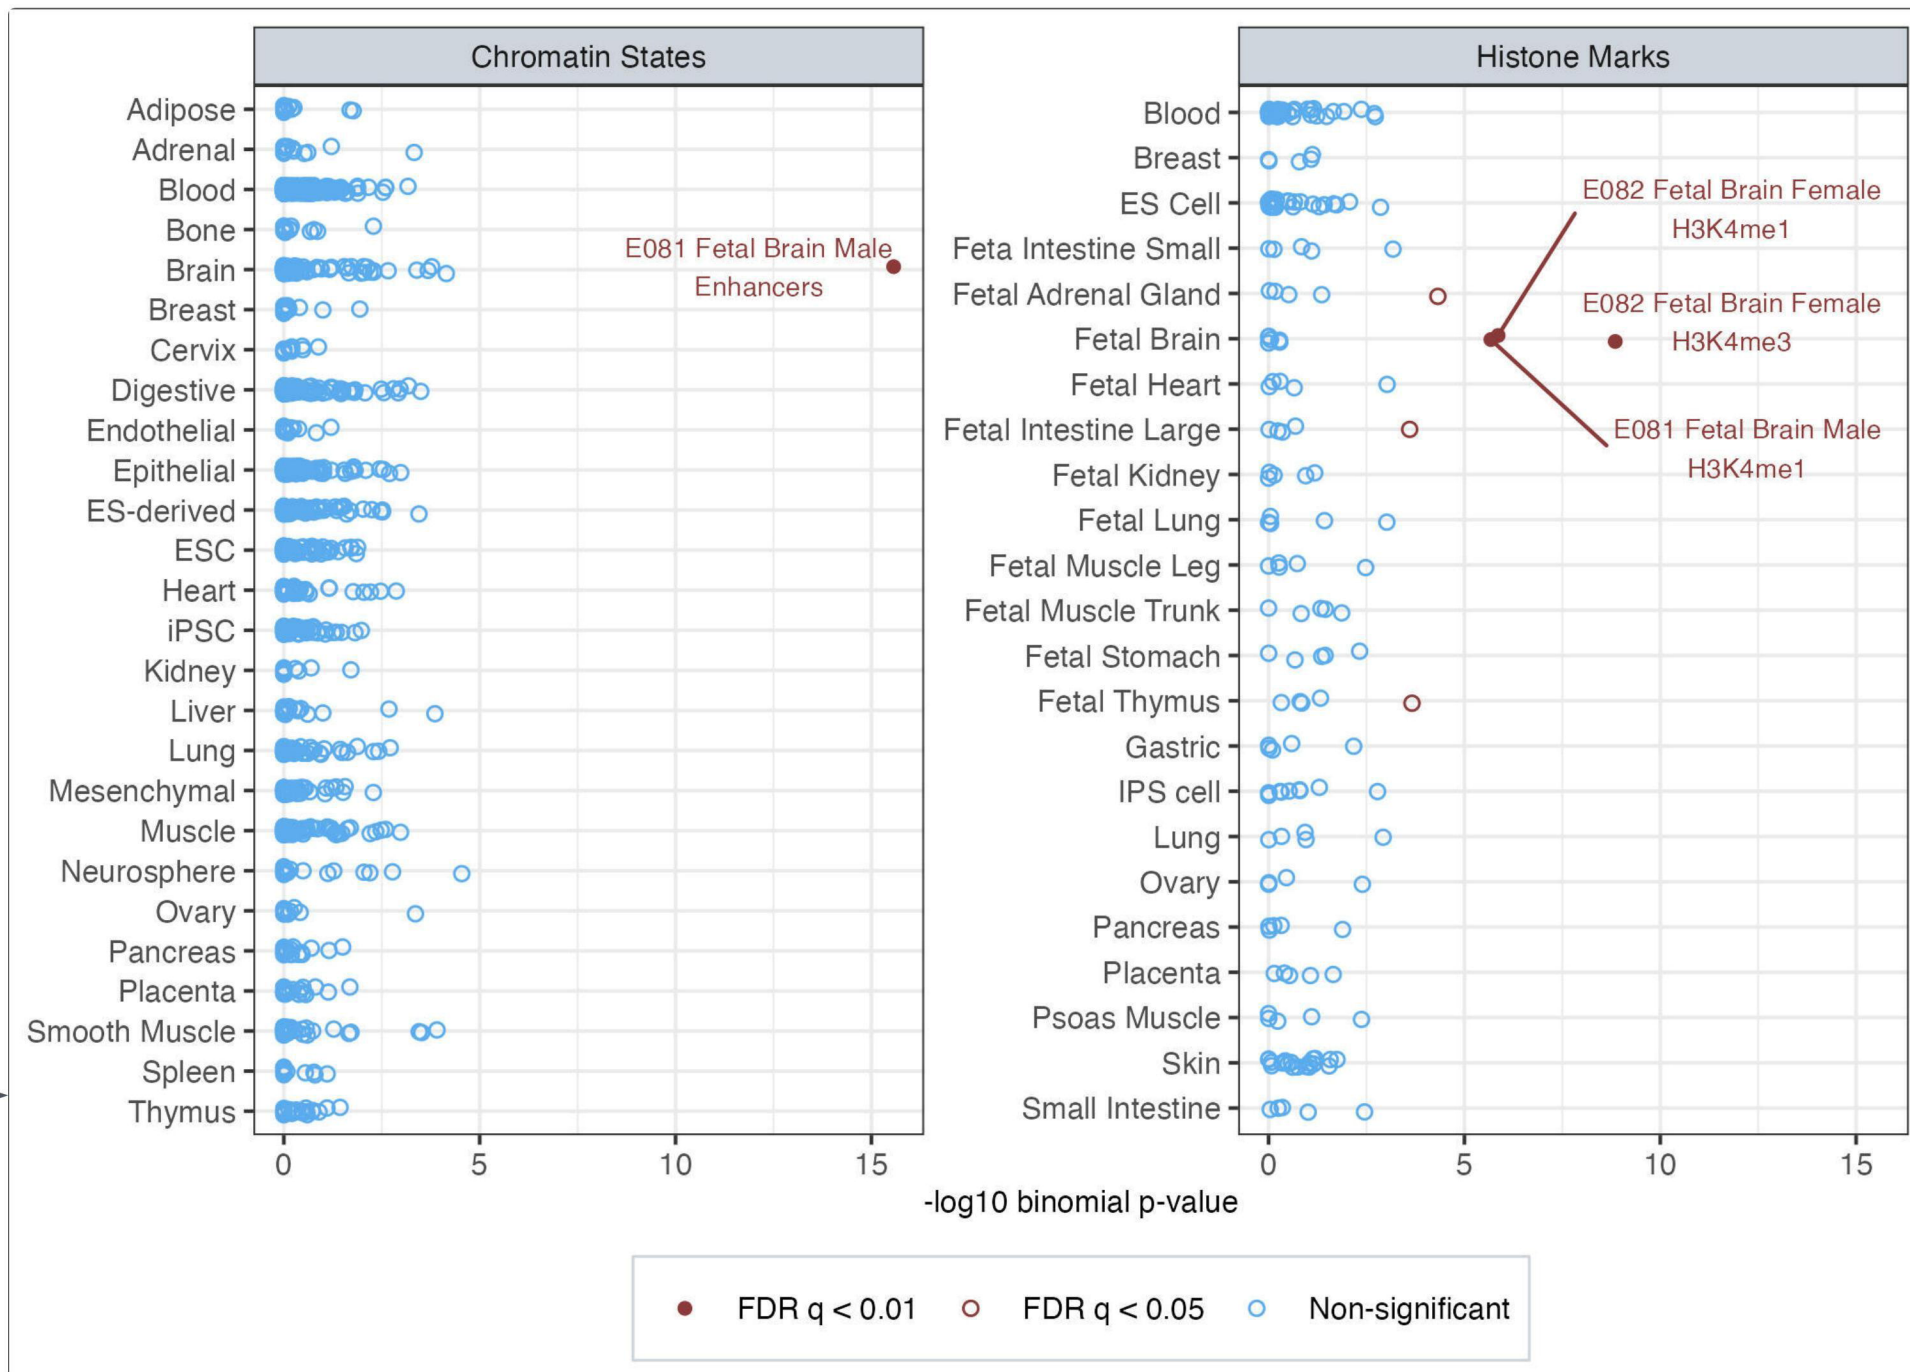



# CPGs with Putative Effects of Former Smoking on DNA Methylation

Sites with FDR < 0.05 in All Three Models

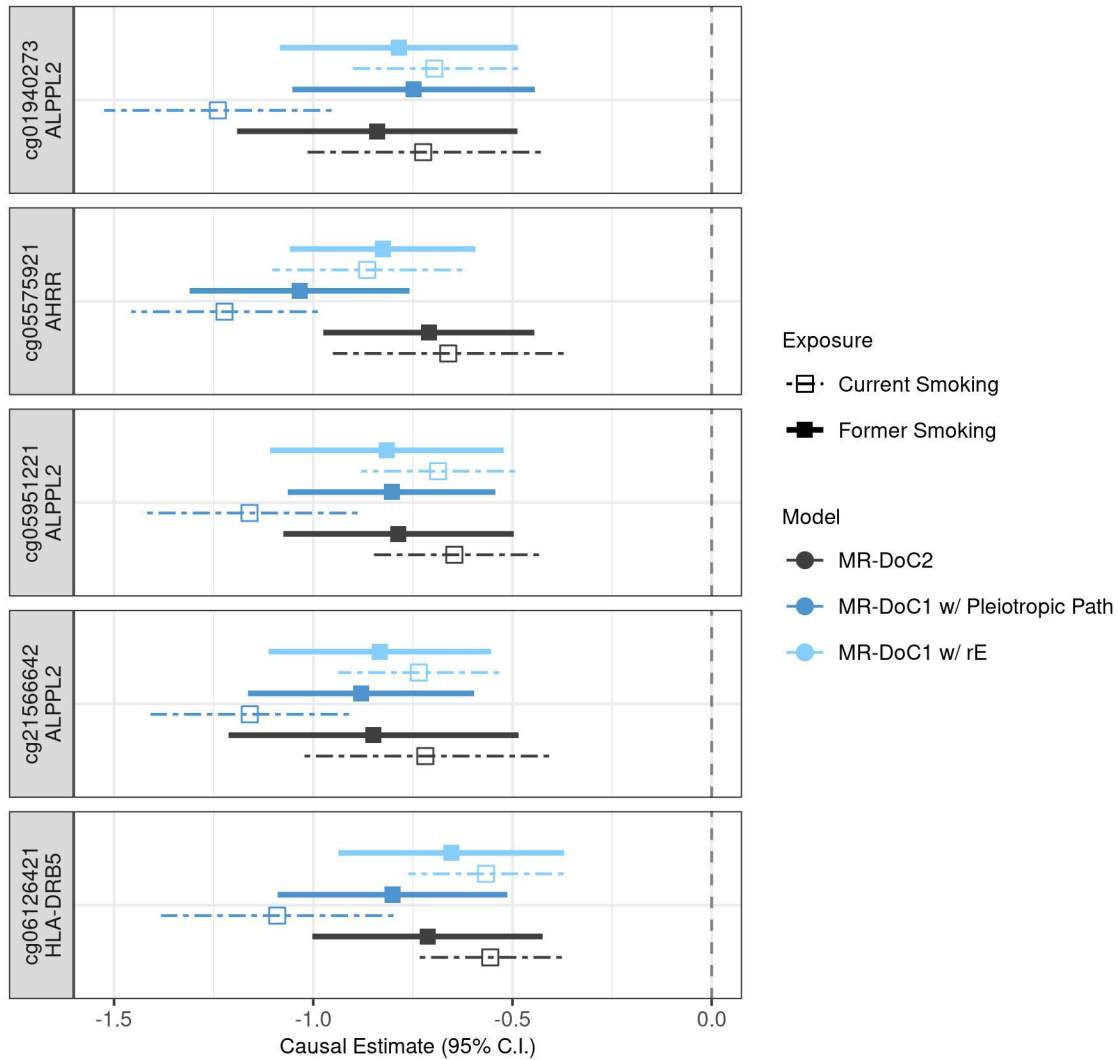

Source: https://medrxiv.org/content/10.1101/2024.06.19.24309184v2.full.pdf
