# Supplementary material for: Unidirectional and Bidirectional Causation between Smoking and Blood DNA Methylation: Evidence from Twin-based Mendelian Randomisation
Source: bioRxiv or medRxiv preprint supplement (doi:10.1101/2024.06.19.24309184), 2024-11-22
Supplement: Supplementary file [file media-1.pdf]

## Supplementary Information

### Twin-based Mendelian Randomization Analyses Highlight Smoking's Effects on Blood DNA Methylation, with Putative Reverse Causation

Madhurbain Singh<sup>1,2,3\*</sup>, Conor V. Dolan<sup>3,4</sup>, Dana M. Lapato<sup>1,2</sup>, Jouke-Jan Hottenga<sup>3,4</sup>, René Pool<sup>3,4</sup>, Brad Verhulst<sup>5</sup>, Dorret I. Boomsma<sup>3,4,12</sup>, Charles E. Breeze<sup>6,7</sup>, Eco J. C. de Geus<sup>3,4</sup>, Gibran Hemani<sup>8</sup>, Josine L. Min<sup>8</sup>, Roseann E. Peterson<sup>9,10,1</sup>, Hermine H. M. Maes<sup>1,2</sup>, Jenny van Dongen<sup>3,4,11\*</sup>, and Michael C. Neale<sup>1,2,3,11\*</sup>

1. Virginia Institute for Psychiatric and Behavioral Genetics, Department of Psychiatry, Virginia Commonwealth University, Richmond, VA, USA
2. Department of Human and Molecular Genetics, Virginia Commonwealth University, Richmond, VA, USA
3. Department of Biological Psychology, Vrije Universiteit (VU) Amsterdam, Amsterdam, The Netherlands
4. Amsterdam Public Health Research Institute, Amsterdam, The Netherlands
5. Department of Psychiatry and Behavioral Sciences, Texas A&M University, College Station, TX, USA
6. Division of Cancer Epidemiology and Genetics, National Cancer Institute, National Institutes of Health, Department Health and Human Services, Bethesda, MD, USA
7. UCL Cancer Institute, University College London, London, UK.
8. MRC Integrative Epidemiology Unit, University of Bristol, Bristol, UK
9. Department of Psychiatry and Behavioral Sciences, SUNY Downstate Health Sciences University, Brooklyn, NY, USA
10. Institute for Genomics in Health, SUNY Downstate Health Sciences University, Brooklyn, NY, USA
11. These authors jointly supervised this work.
12. Current address: Department of Complex Trait Genetics, Center for Neurogenomics and Cognitive Research, Vrije Universiteit (VU) Amsterdam, Amsterdam, The Netherlands

\*Corresponding authors:

Madhurbain Singh. Email: [singhm18@vcu.edu](mailto:singhm18@vcu.edu). Address: Virginia Institute for Psychiatric and Behavioral Genetics, 800 E. Leigh St., Suite 100, Richmond, VA 23298, USA

Jenny van Dongen. Email: [j.van.dongen@vu.nl](mailto:j.van.dongen@vu.nl). Address: Department of Biological Psychology, Vrije Universiteit Amsterdam, van der Boechorststraat 7, 1081 BT Amsterdam, The Netherlands

Michael C. Neale. Email: [michael.neale@vcuhealth.org](mailto:michael.neale@vcuhealth.org). Address: Virginia Institute for Psychiatric and Behavioral Genetics, 800 E. Leigh St., Suite 100, Richmond, VA 23298, USA

41 **Table of Contents**

42 **Supplementary Methods.....4**

43 **Genotypic Data, Principal Components Analysis, and Ancestry Outlier Pruning .....4**

44 **Smoking Assessment at Blood Sampling.....4**

45 **Polygenic Risk Score of Smoking .....4**

46 **Supplementary Figures ..... 6**

47 **Figure S1 .....6**

48 **Figure S2 .....6**

49 **Figure S3 .....7**

50 **Figure S4 .....7**

51 **Figure S5 .....8**

52 **Figure S6 .....9**

53 **Figure S7 .....10**

54 **Figure S8 .....11**

55 **Figure S9 .....12**

56 **Figure S10 .....13**

57 **Figure S11 .....14**

58 **Figure S12 .....16**

59 **Figure S13 .....17**

60 **Figure S14 .....18**

61 **Figure S15 .....19**

62 **Figure S16 .....20**

63 **Figure S17 .....20**

64 **Figure S18 .....21**

65 **Figure S19 .....22**

66 **Figure S20** .....23

67 **Figure S21** .....24

68 **Figure S22** .....25

69 **Figure S23** .....26

70 **Figure S24** .....27

71 **Figure S25** .....28

72 **Figure S26** .....29

73 **Figure S27** .....30

74 **Figure S28** .....31

75 **Figure S29** .....32

76 **Figure S30** .....33

77 **Figure S31** .....34

78 **Figure S32** .....35

79 **Figure S33** .....36

80 **Figure S34** .....37

81 **Figure S35** .....38

82 ***References***.....39

83

84

## 85 **Supplementary Methods**

86 In this study, we analyzed data from the Netherlands Twin Register (NTR)<sup>1</sup> to examine the causal  
87 influences between smoking status and blood DNA methylation (DNAm) using MR-DoC models<sup>2,3</sup>. In  
88 the current analyses, we included data from European-ancestry adult twins with both genotypic and  
89 DNAm data, comprising 2,577 individuals (67% female).

### 91 **Genotypic Data, Principal Components Analysis, and Ancestry Outlier Pruning**

92 The DNA samples included in the current study were genotyped on 3 SNP (single nucleotide  
93 polymorphism) microarray platforms: Affymetrix 6.0 (N= 2,399), Affymetrix Axiom (N= 83), and  
94 Illumina GSA NTR array (N= 95). Genotype calling was done following the manufacturer's protocols.  
95 Sample and variant quality control (QC), imputation, genetic principal component analysis (PCA), and  
96 ancestry assignment have been previously described<sup>4</sup>. Briefly, after QC and harmonizing variants across  
97 the three platforms, the data were aligned to the positive strand of *Genome Reference Consortium Human*  
98 *Build 37* (GRCh37) and then imputed against the European (EUR) super-population of the 1000 Genomes  
99 Project Phase-3 (KGP3)<sup>5</sup>, the Haplotype Reference Consortium (HRC)<sup>6</sup> 1.1 (Ega version), and the  
100 Genome of the Netherlands Consortium (GoNL)<sup>7</sup> reference panels. Using SmartPCA in EIGENSTRAT<sup>8</sup>,  
101 the first 20 PCs for the genotypic data were calculated in the KGP3 data, and the NTR samples were then  
102 projected onto the PC space based on the SNP weights. Samples identified as outliers in the PC space  
103 were then excluded.

### 105 **Smoking Assessment at Blood Sampling**

106 At the time of blood sampling for DNAm assessment, the participants answered the following  
107 questions about smoking in Dutch. The English translations are described in the main **Methods** section.

|                                              |                             |                                                                      |
|----------------------------------------------|-----------------------------|----------------------------------------------------------------------|
| Rookt u?                                     | 1. Ja                       | 1a: hoelang rookt u al? .....jaar                                    |
|                                              |                             | 1b: hoeveel sigaretten/ shagjes per dag?<br>.....sigaretten/ shagjes |
|                                              | 2. Nee, wel in het verleden | 2a: hoelang is dat geleden?.....jaar                                 |
|                                              |                             | 2b: hoeveel jaren heeft u gerookt?.....jaar                          |
|                                              |                             | 2c: hoeveel rookte u per dag (max)?<br>.....sigaretten/ shagjes      |
|                                              | 3. Nooit                    |                                                                      |
| Gerookt binnen laatste uur voor bloedafname? | 1. Ja<br>2. Nee<br>3. Nvt   |                                                                      |

108

109

### 110 **Polygenic Risk Score of Smoking**

111 The PRS of smoking was based on the European-ancestry summary statistics from the genome-  
112 wide association study (GWAS) of smoking initiation (lifetime regular smoking) by GSCAN (GWAS &  
113 Sequencing Consortium of Alcohol and Nicotine use)<sup>9</sup>, excluding the NTR from the meta-analysis.

114 As described in a previous study using the same PRS in the NTR<sup>4</sup>, the post-imputation SNPs  
115 from the merged best-guess three-platform data were QCed to satisfy the following criteria: MAF >0.01,

116 HWE  $p > 0.00001$ , Mendel error rate  $< 1\%$ , and genotype call rate over 98%. Furthermore, the imputation  
117 info for the three platforms needed to be above 0.10, and the allele frequency between platforms after  
118 imputation could not differ more than 2%, leaving a total of 7,551,860 post-QC SNPs for analysis. The  
119 PRS was calculated using *LDpred* v0.9<sup>10</sup>, with HRC+GoNL as the LD (linkage disequilibrium) reference  
120 panel. For estimating the target LD structure, we used a subset of unrelated individuals and a set of well-  
121 imputed variants in the NTR. The parameter `ld_radius` was set by dividing the number of variants in  
122 common (from the output of the coordination step) by 12000. For the coordination step, the median  
123 sample size was used as the input value for N. For the LDpred step, we applied the following thresholds  
124 for the fraction of variants with non-zero effects (in addition to the default infinitesimal model): --  
125 `PS=0.5, 0.3, 0.2, 0.1, 0.05, 0.01`.

126 To determine the LDpred threshold that yielded the PRS with the highest predictive power for the  
127 variables of interest (current vs. never and former vs. never smoking), we fitted logistic regression models  
128 in R (v4.3.2) to estimate incremental  $R^2$  on a liability scale. We first fitted a null logistic regression model  
129 using the `glm()` function with `family=binomial(link='logit')` and a standard set of  
130 covariates comprising age (linear and quadratic), sex, SNP microarray platform (dummy variables), and  
131 the first ten genetic PCs (without including the PRS). Then, we fitted a full model with the PRS as an  
132 additional independent variable. We estimated the liability-scale  $R^2$  in both models and then the  
133 difference in the two  $R^2$  estimates as the variance in the outcome variable explained by the PRS  
134 (controlling for the covariates). For both outcome variables (current and former smoking), the PRS with  
135 the highest incremental  $R^2$  was based on a threshold of 0.1 and thus retained for further analyses. The  
136 PRS was residualized for the SNP microarray platform and the first ten genetic PCs using linear  
137 regression models. The residuals were then standardized to have a mean of zero and an S.D. of one before  
138 using it as an IV in the MR-DoC models.

139  
140

141 **Supplementary Figures**

142 **Figure S1**

143 *QQ Plot of MR-DoC1 models (with unique environmental confounding, rE) of Current Smoking →*  
144 *DNAm at 411,169 epigenome-wide CpGs (Bayesian genomic inflation factor,  $\lambda = 1.09$ ).*

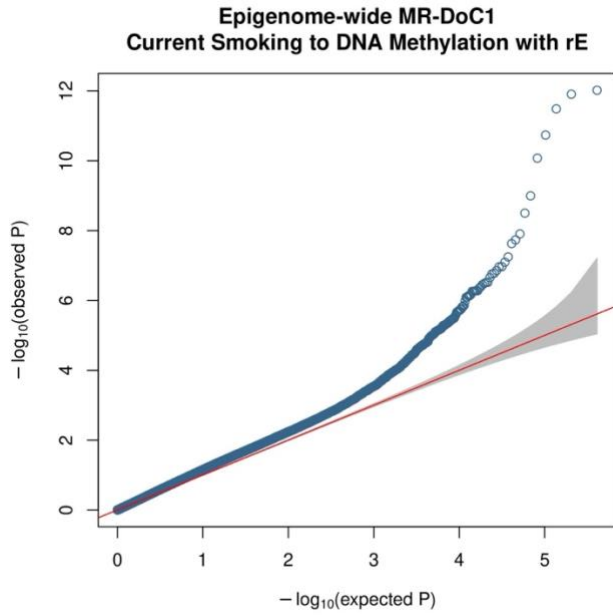

145

146 **Figure S2**

147 *QQ Plot of MR-DoC1 models (with unique environmental confounding, rE) of Current Smoking →*  
148 *DNAm at 16,940 smoking-associated CpGs (Bayesian genomic inflation factor,  $\lambda = 1.20$ ).*

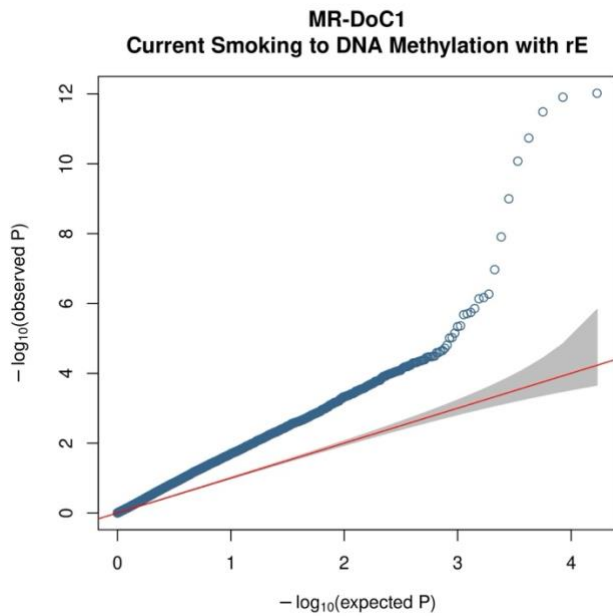

149

150 **Figure S3**  
151 *QQ Plot of the Current Smoking → DNAm causal estimates in MR-DoC2 models across 11,124 smoking-*  
152 *associated CpGs (Bayesian genomic inflation factor,  $\lambda = 1.20$ ).*

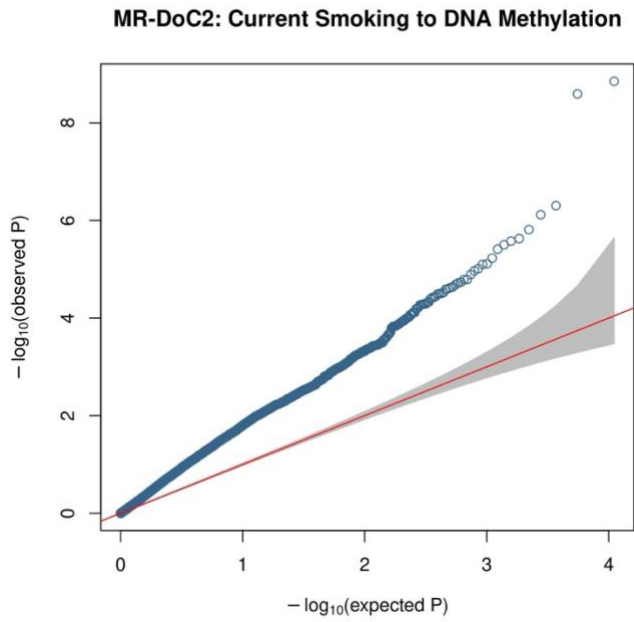

153  
154 **Figure S4**  
155 *QQ Plot of the DNAm → Current Smoking causal estimates in MR-DoC2 models across 11,124 smoking-*  
156 *associated CpGs (Bayesian genomic inflation factor,  $\lambda = 1.01$ ).*

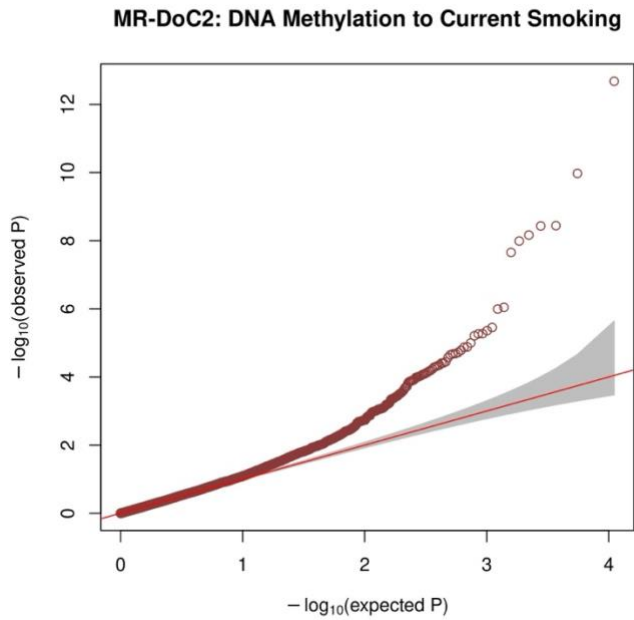

157  
158

159 **Figure S5**  
 160 *Bidirectional Causal Estimates at the 64 CpGs with Robust Evidence of the Causal Effects of Current*  
 161 *Smoking on DNA methylation*

**Bidirectional Causal Estimates between Current Smoking and DNAm  
 At 64 CpGs where Current Smoking Likely Affects DNAm**

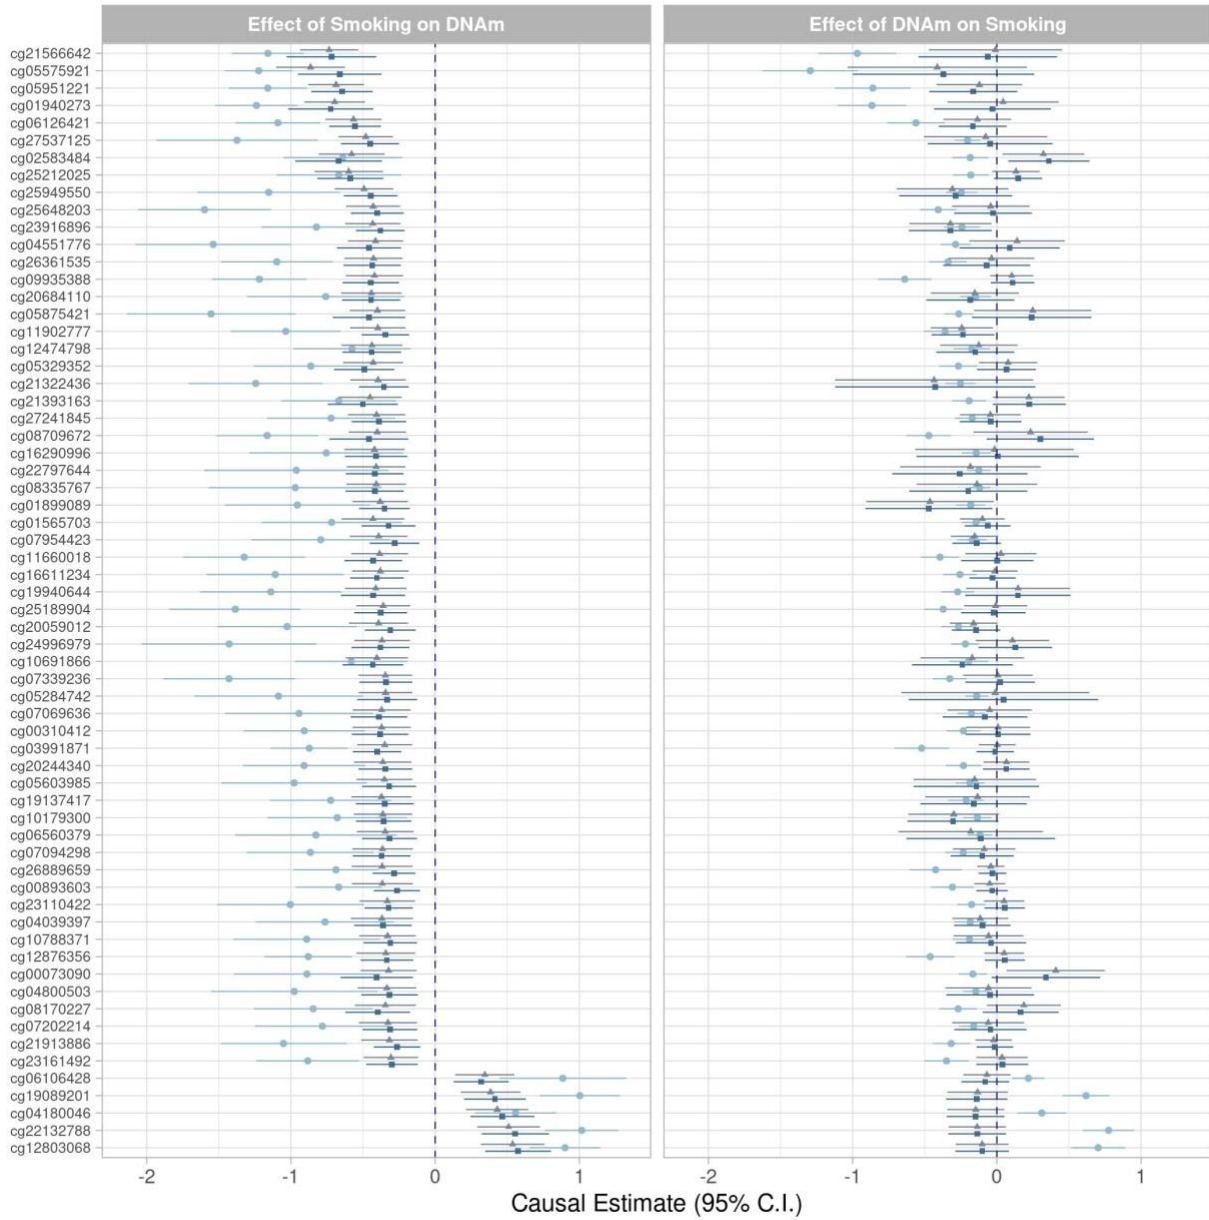

Model ■ MR-DoC2 ● MR-DoC1 w/ Pleiotropic Path ▲ MR-DoC1 w/ rE

162  
 163 These CpGs did not show robust evidence for the reverse effects of DNAm on current smoking. Please  
 164 refer to **Supplementary Tables S1** (*Current Smoking → DNAm*) and **S2** (*DNAm → Current Smoking*) for  
 165 the corresponding data.

166  
 167



168 **Figure S6**  
 169 *Upset plot of the intersection of CpGs with statistically significant Current Smoking → DNAm effects*  
 170 *after Bonferroni correction in each of the three MR-DoC models*

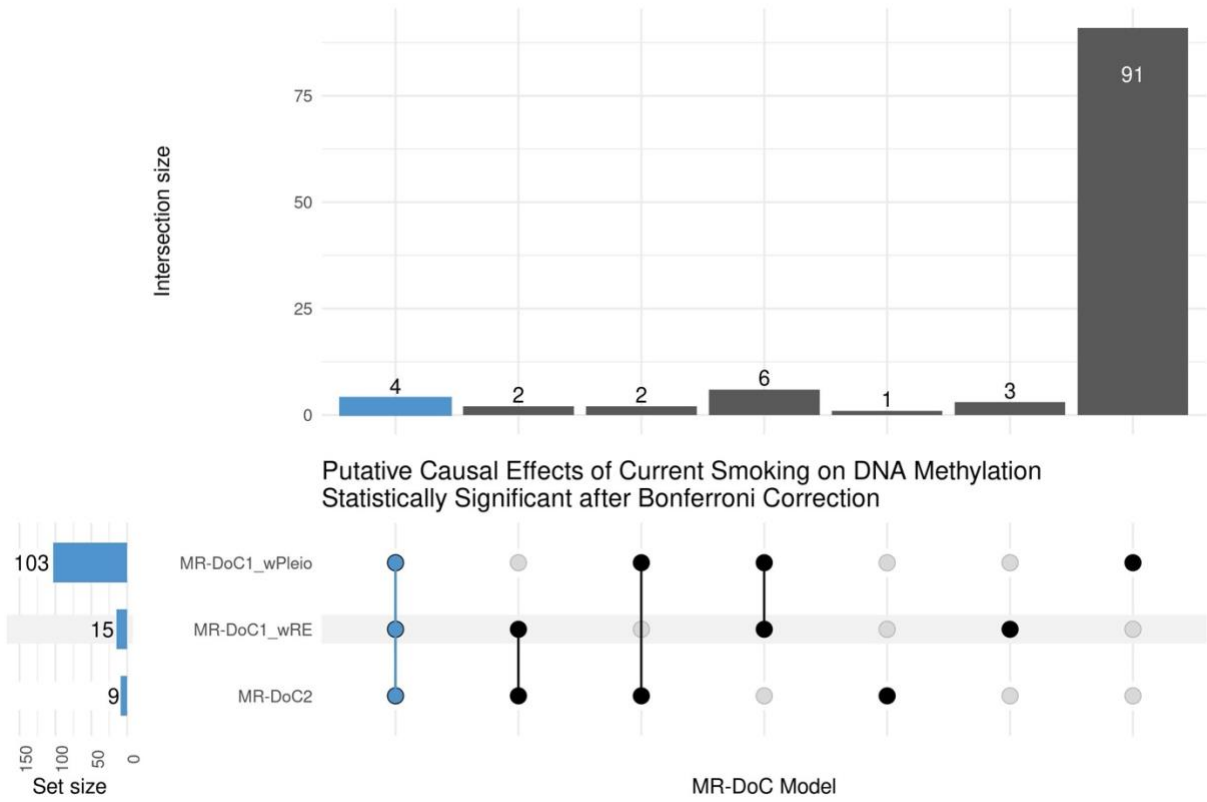

171  
 172  
 173 *Note.* Please refer to **Supplementary Table S1** for the corresponding data  
 174  
 175

176 **Figure S7**  
 177 *Upset plot of the intersection of CpGs with statistically significant DNAm → Current Smoking effects*  
 178 *after Bonferroni correction in each of the three MR-DoC models*  
 179

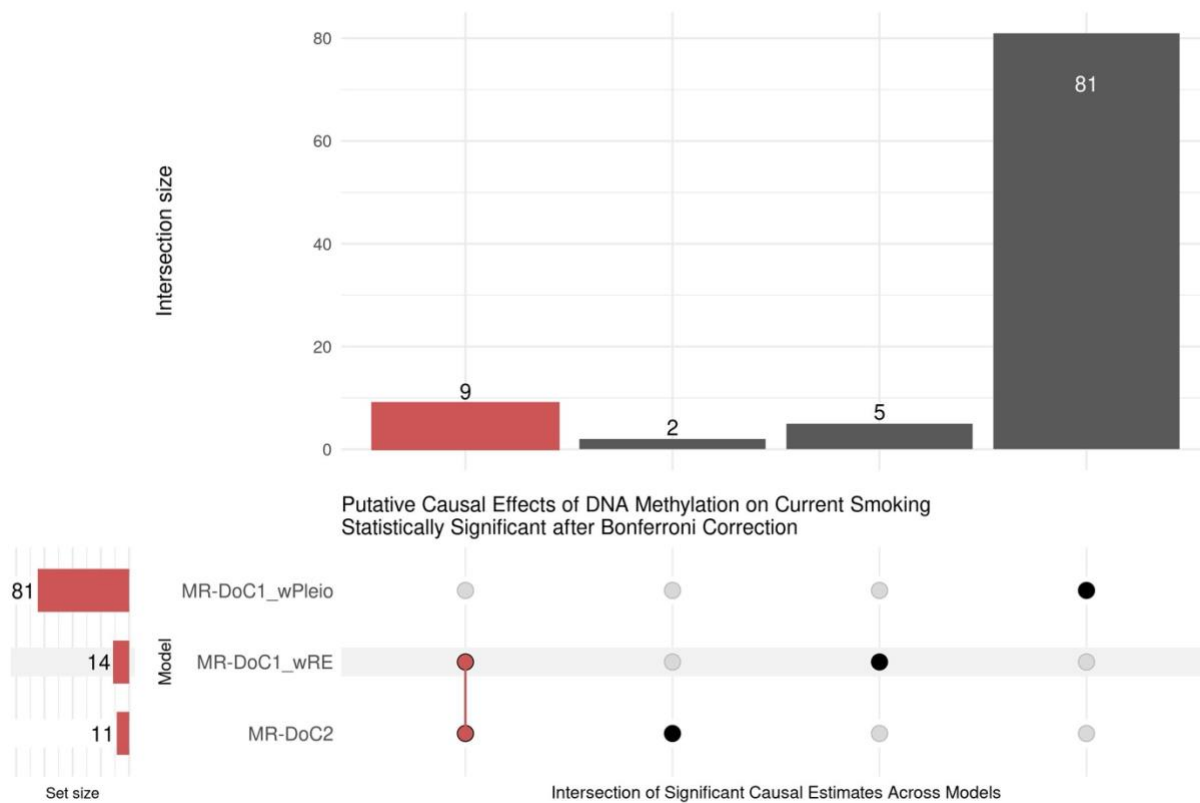

180  
 181  
 182 *Note.* Please refer to **Supplementary Table S3** for the corresponding data  
 183  
 184  
 185

186  
187

**Figure S8**  
19 CpGs with potential bidirectional causal effects between current smoking and DNA methylation  
Suggestive Bidirectional Causal Effects between Smoking and DNAm at 19 CpGs

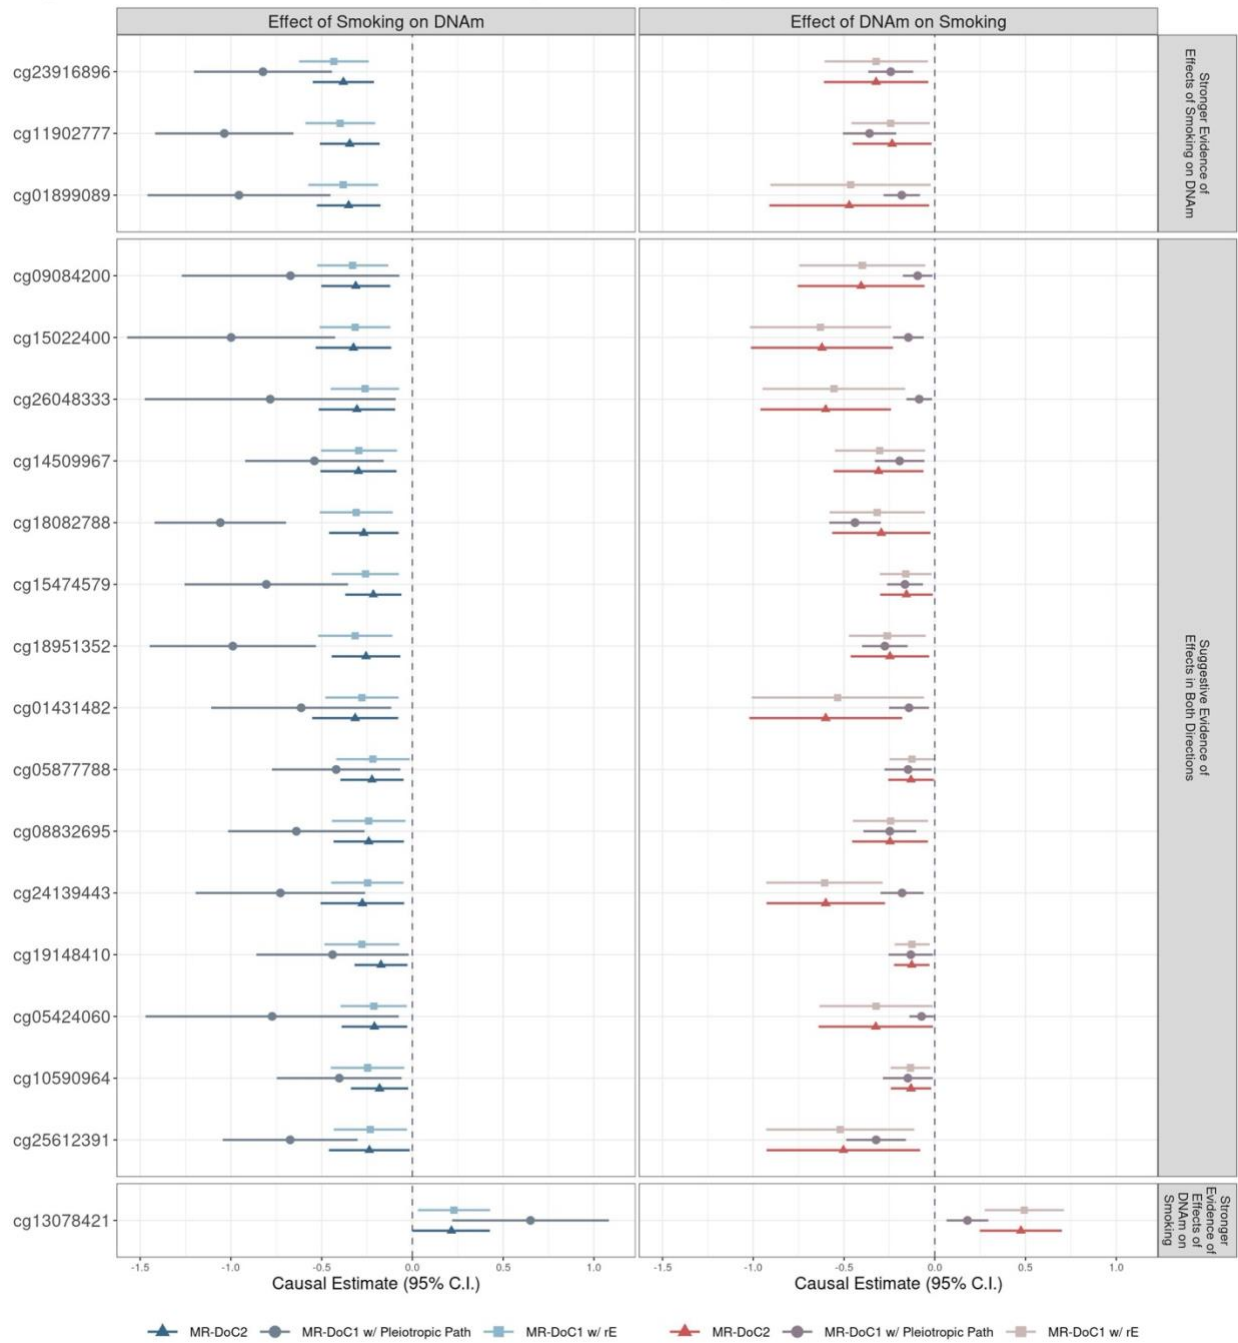

188  
189  
190  
191  
192

Note. Three CpGs had more robust evidence of *Current Smoking*  $\rightarrow$  *DNAm* causal effects than *vice versa*. One CpG had more robust evidence of *DNAm*  $\rightarrow$  *Current Smoking* causal effects than *vice versa*. The rest 15 CpGs had only suggestive evidence (consistent, nominally significant estimates across models) in both directions. Please refer to **Supplementary Tables S1-S4** for the corresponding data.

193 **Figure S9**  
 194 *Top Enriched Ontology Clusters in Metascape’s Gene Annotation and Functional Enrichment Analyses*  
 195 *of the 525 CpGs (outside the MHC region) with Potential Current Smoking → DNAm effects*  
 196

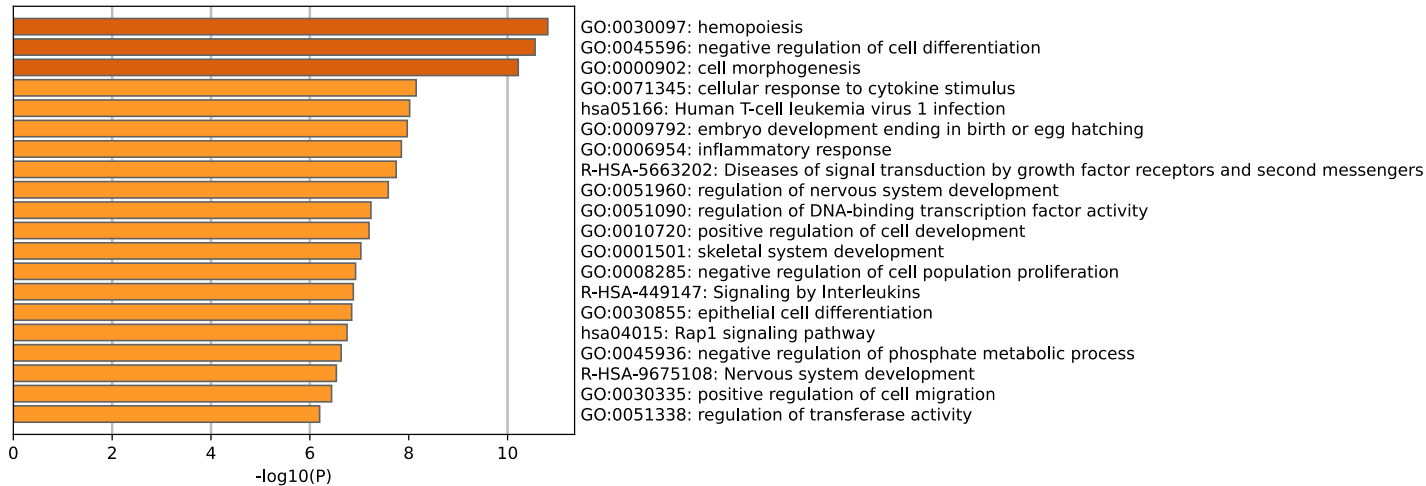

197  
 198  
 199 *Note.* The “NearestGene” IDs from *Supplementary Table S1* were used as the input data for Metascape<sup>12</sup>.  
 200 Please refer to **Supplementary Tables S5-S6** for the corresponding annotation and enrichment results.  
 201 As detailed in the Metascape manuscript<sup>12</sup>, the program first identified all significant ontology terms,  
 202 including GO/KEGG terms, canonical pathways, and hallmark gene sets. The significant terms (based on  
 203 hypergeometric p-value <0.01 and >1.5-fold enrichment) were then clustered into a hierarchical tree  
 204 based on Kappa-statistical similarities among their gene memberships. The tree was then cast into term  
 205 clusters based on a threshold of 0.3 kappa score. The enrichment clusters and their underlying terms are  
 206 marked as “Summary” and “Membership”, respectively, under the column *GroupID* in *Supplementary*  
 207 *Table S24*. The “Summary” terms provide an overview of enriched, non-redundant ontology terms.  
 208  
 209

210 **Figure S10**  
 211 *Enrichment Results for Gene-Ontology (GO) Processes in Metascape’s Gene Annotation and Functional*  
 212 *Enrichment Analyses of the 525 CpGs (outside the MHC region) with Potential Current Smoking →*  
 213 *DNA<sub>m</sub> effects*

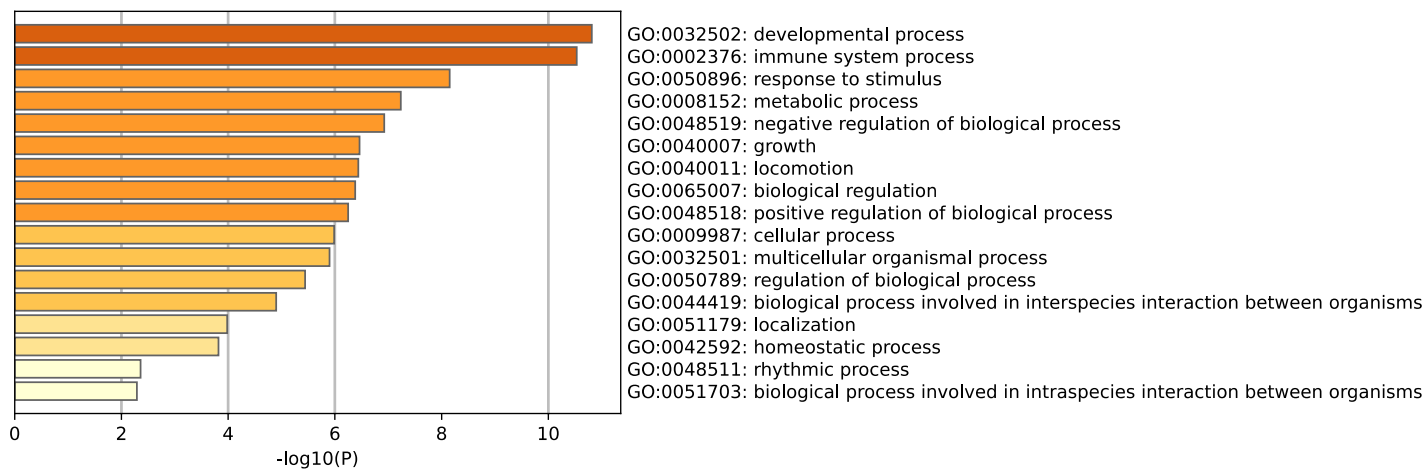

214  
 215  
 216 *Note.* The “NearestGene” IDs from *Supplementary Table S1* were used as the input data for Metascape<sup>12</sup>.  
 217 Please refer to **Supplementary Table S6** for all enrichment results.  
 218  
 219  
 220

221 **Figure S11**  
 222 *Top 100 Ontology Terms in Metascape's Gene Annotation and Functional Enrichment Analyses of the*  
 223 *525 CpGs (outside the MHC region) with Potential Current Smoking → DNAm effects*

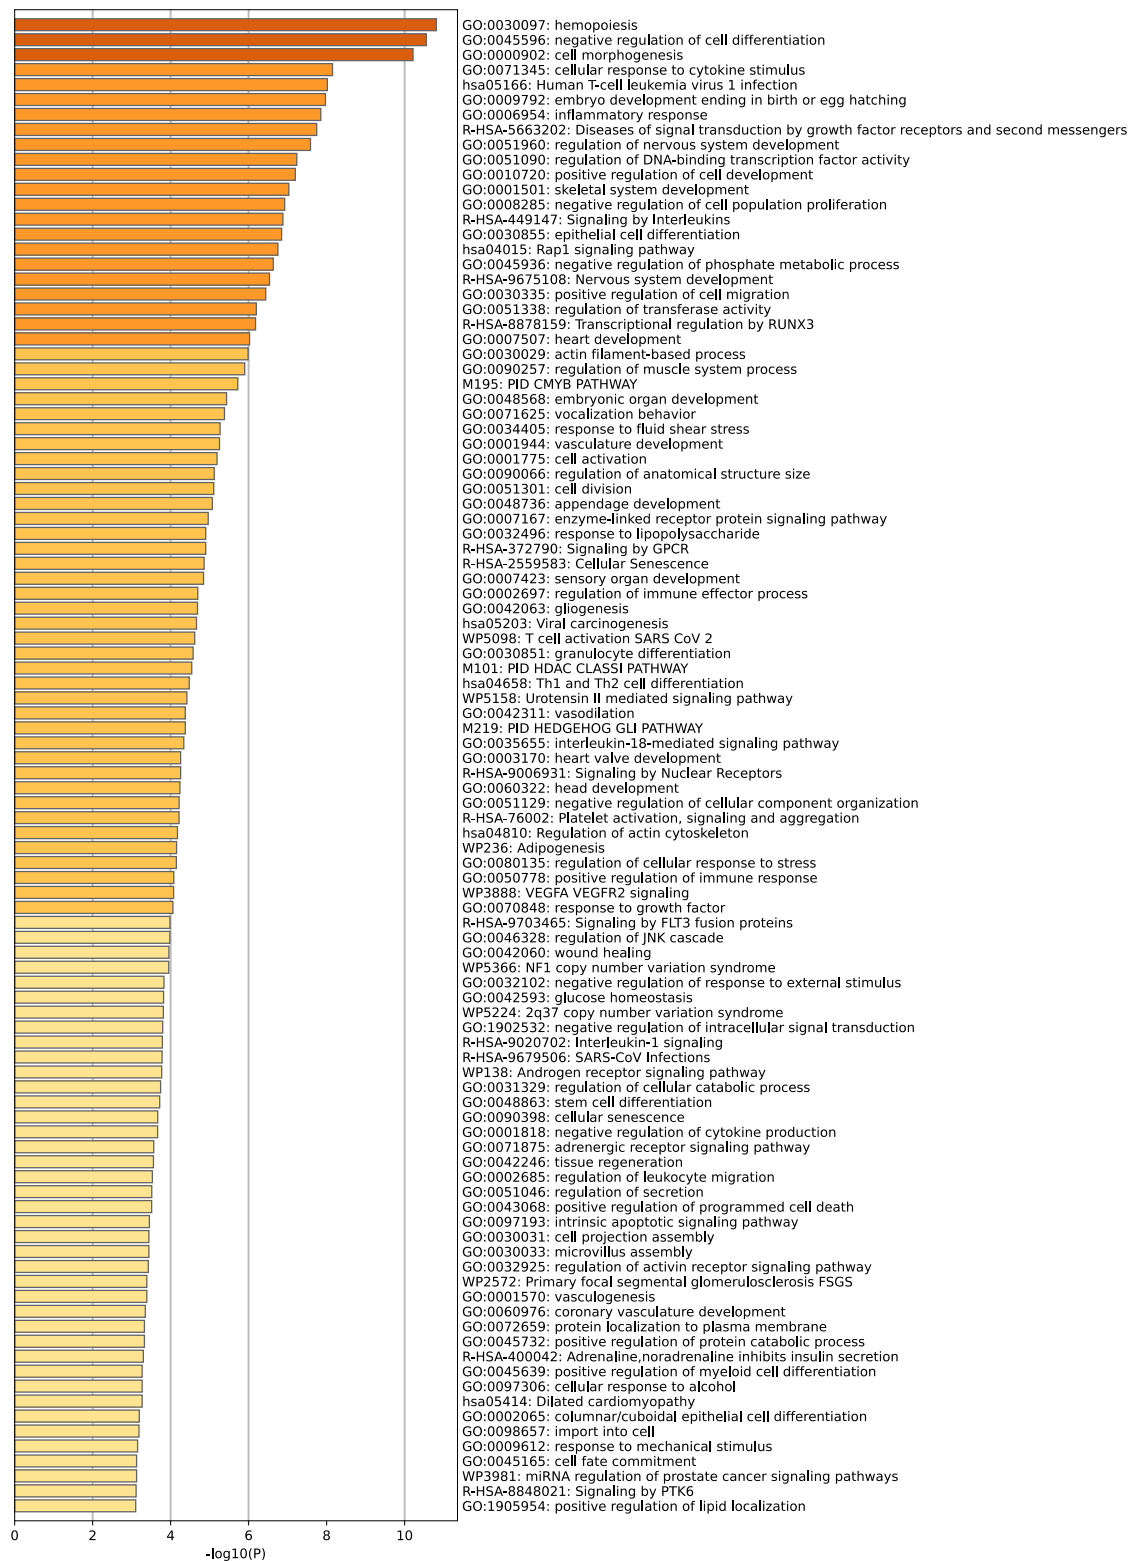

225 *Note.* The “NearestGene” IDs from *Supplementary Table S1* were used as the input data for Metascape<sup>12</sup>.  
226 Please refer to **Supplementary Table S6** for all enrichment results.  
227





236 **Figure S13**

237 *eFORGE analyses of overlap between histone-mark modifications and the 525 CpGs (outside the MHC region) with potential Current Smoking →*

238 *DNAm effects*

239

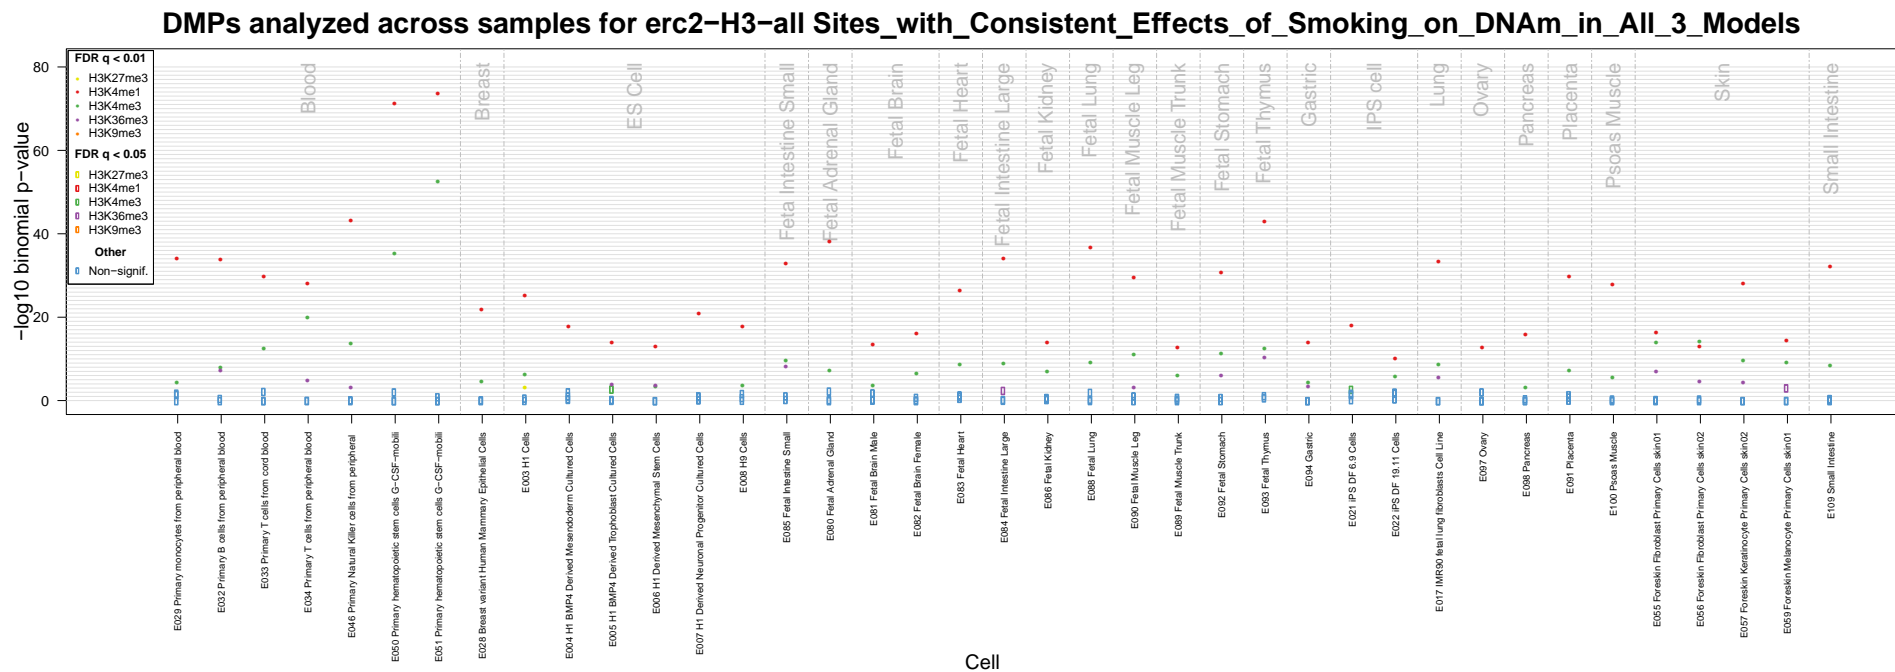

240

241

242 *Note.* Please refer to **Supplementary Table S8** for the corresponding data.

243

244 **Figure S14**

245 *eFORGE* analyses of overlap between DNase hypersensitivity (DHS) sites and the 546 CpGs with potential Current Smoking → DNAm effects

246

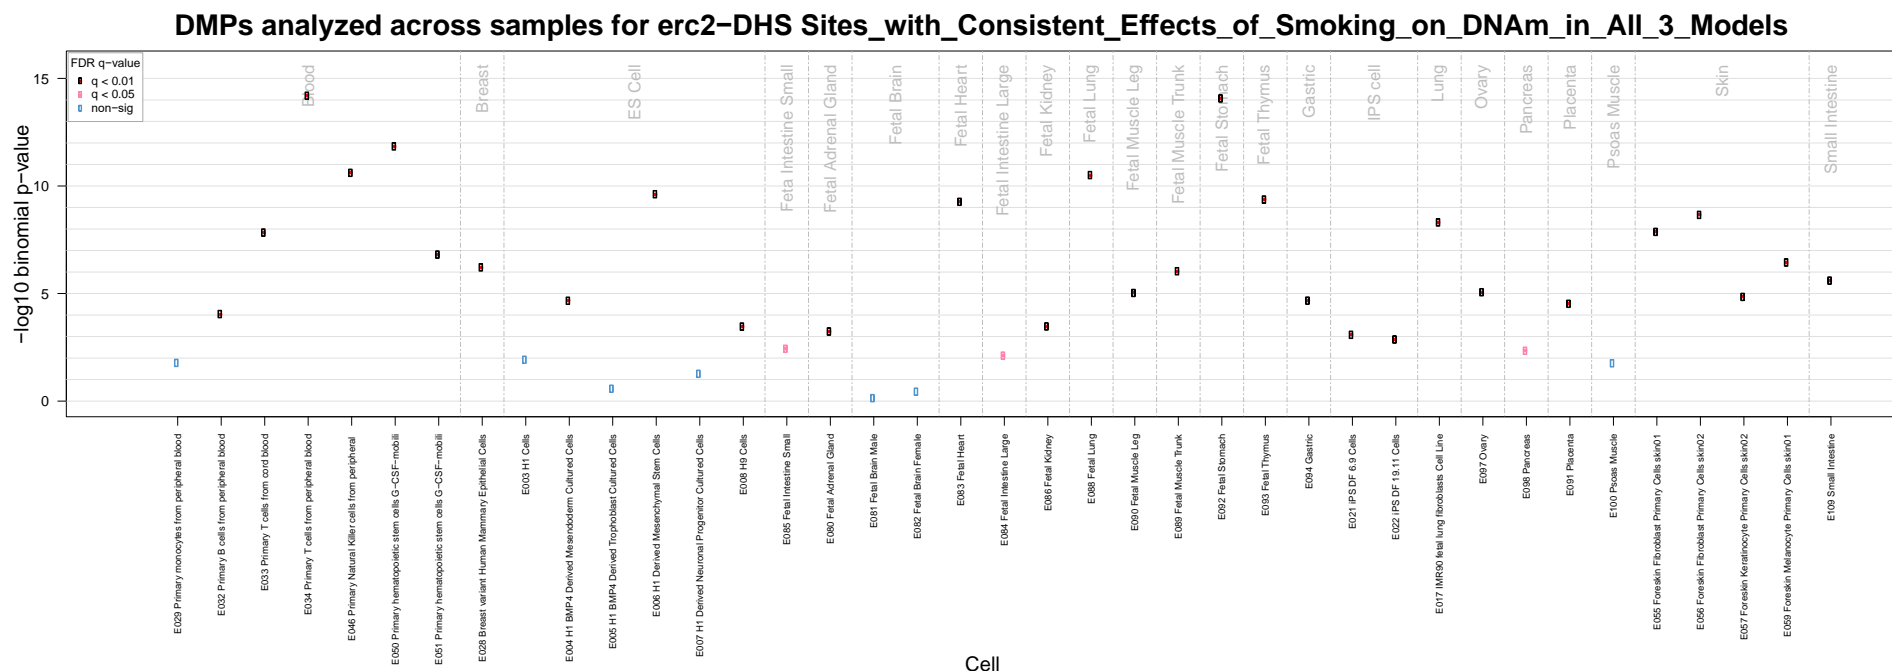

247

248

249 *Note.* Please refer to **Supplementary Table S9** for the corresponding data.

250

251 **Figure S15**  
 252 *64 CpGs with potential DNAm → Current Smoking effects, based on consistent, nominally significant*  
 253 *estimates across models*

CpGs with Consistent Estimates of the Effects of DNAm on Current Smoking

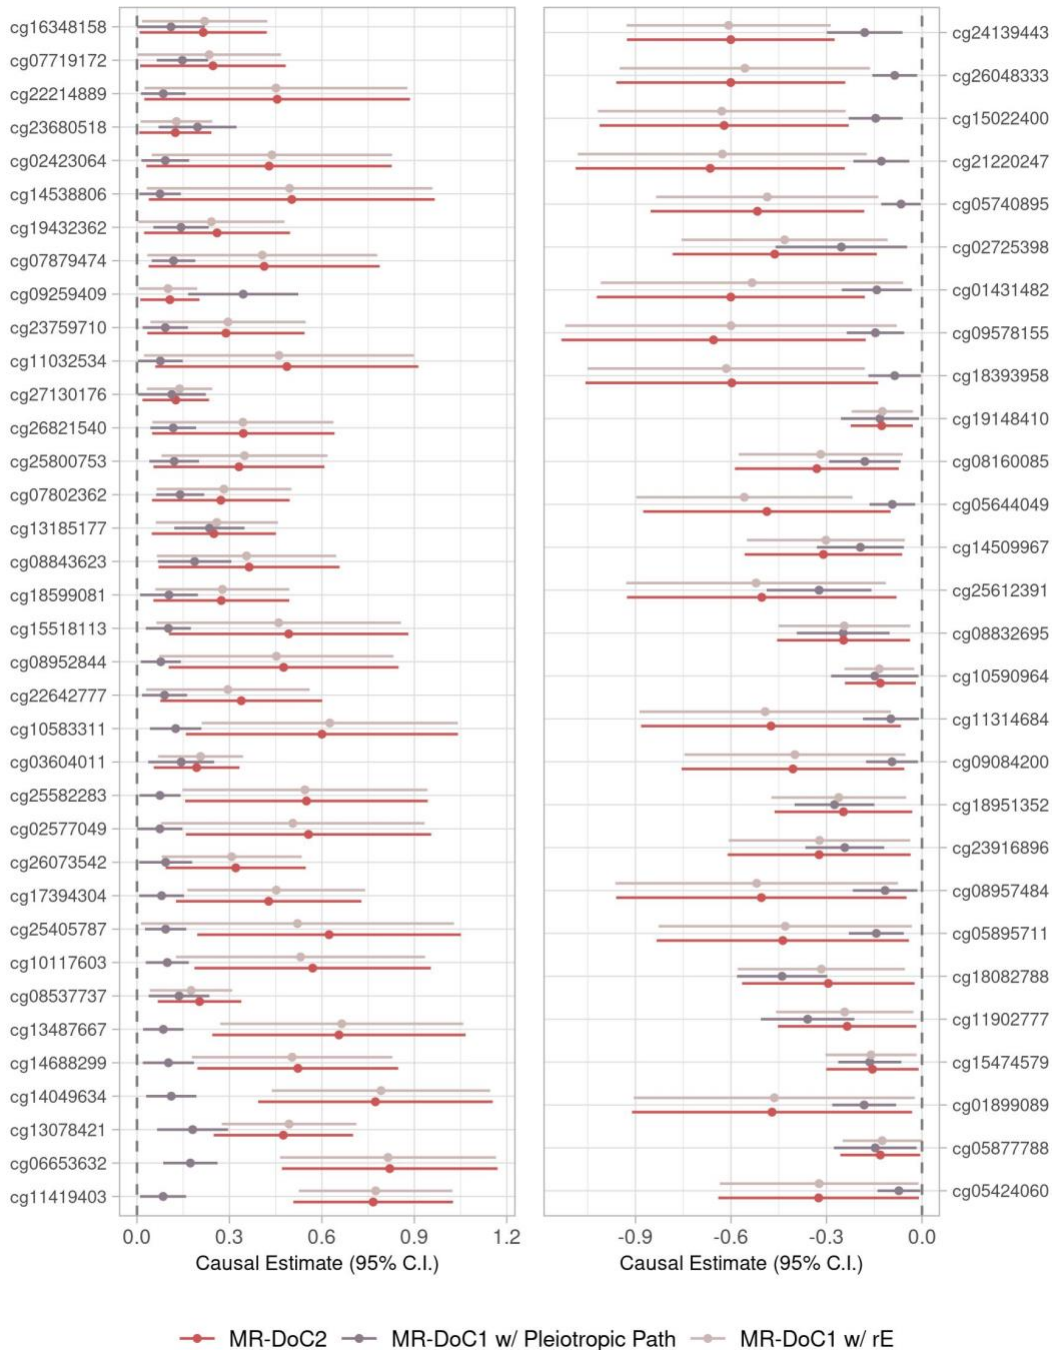

254  
 255 *Note.* These CpGs were used for the follow-up enrichment analyses with eFORGE<sup>11</sup> and Metascape<sup>12</sup>.  
 256 None of these sites are in the MHC region. Please refer to **Supplementary Table S3** for the  
 257 corresponding data.

258 **Figure S16**  
 259 *Top Ontology Clusters in Metascape’s Gene Annotation and Functional Enrichment Analyses of the 64*  
 260 *CpGs with Potential DNAm → Current Smoking effects*  
 261

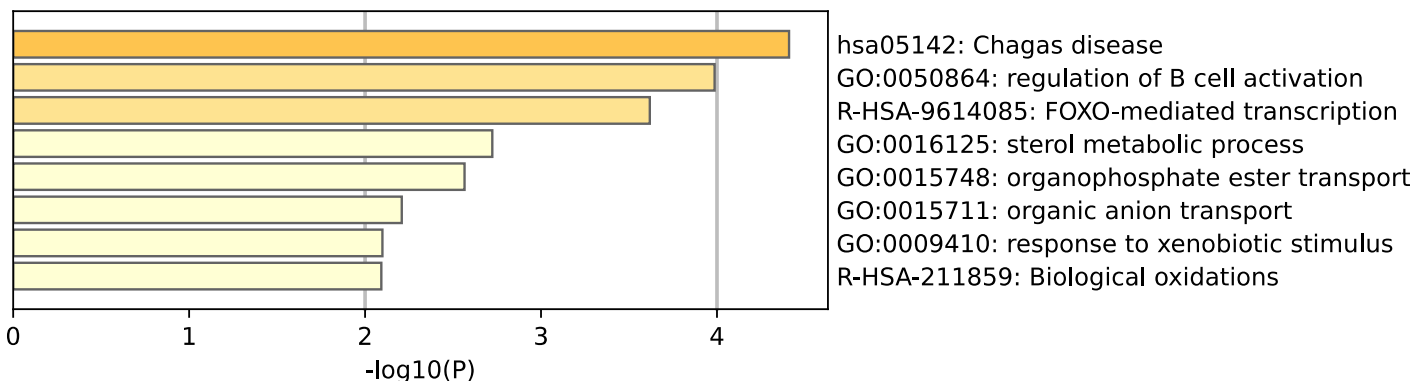

262  
 263 *Note.* The “NearestGene” IDs from *Supplementary Table S3* were used as the input data for Metascape<sup>12</sup>.  
 264 None of the ontology terms were significant after multiple-testing correction. Please refer to  
 265 **Supplementary Tables S10 and S11** for all annotation and enrichment results.  
 266

267 **Figure S17**  
 268 *Enrichment Results for Gene-Ontology (GO) Processes in Metascape’s Gene Annotation and Functional*  
 269 *Enrichment Analyses of the 64 CpGs with Potential DNAm → Current Smoking effects*  
 270

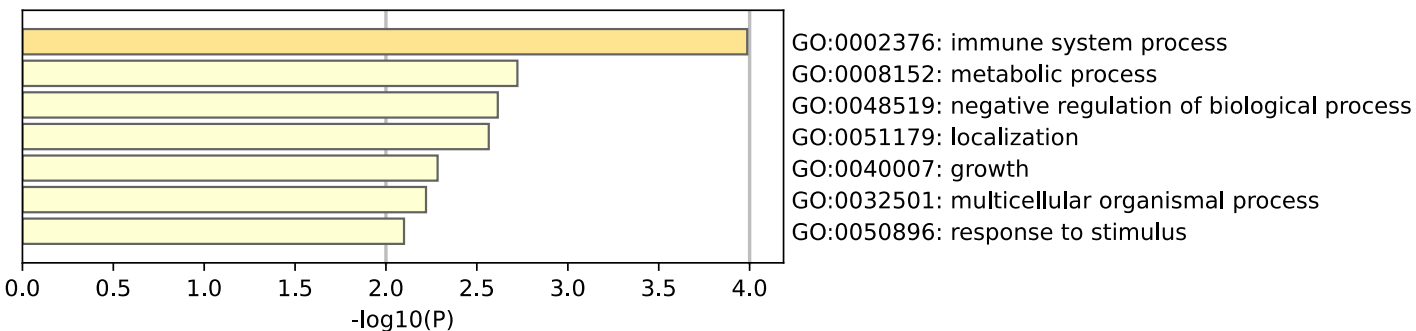

271  
 272 *Note.* The “NearestGene” IDs from *Supplementary Table S3* were used as the input data for Metascape<sup>12</sup>.  
 273 None of the ontology terms were significant after multiple-testing correction. Please refer to  
 274 **Supplementary Table S11** for all enrichment results.  
 275  
 276

277  
278

**Figure S18**

*e*FORGE analyses of overlap between gene-regulatory chromatin states and the 64 CpGs with potential DNAm → Current Smoking effects

DMPs analyzed across samples for *erc2*-chromatin15state-all Sites\_with\_Consistent\_Effects\_of\_DNAm\_on\_Smoking\_in\_All\_3\_Models

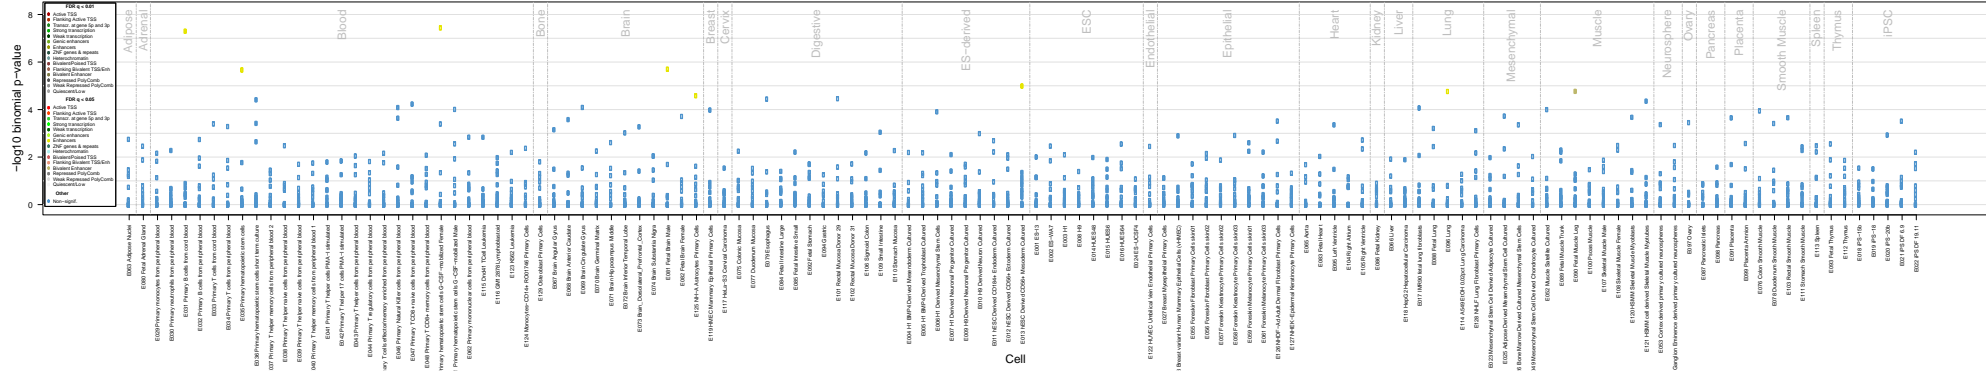

279  
280  
281

Note. Please refer to **Supplementary Table S12** for the corresponding data.

282  
283

**Figure S19**

*eFORGE analyses of overlap between histone-mark modifications and the 64 CpGs with potential DNAm → Current Smoking effects*

**DMPs analyzed across samples for *erc2*-H3-all Sites\_with\_Consistent\_Effects\_of\_DNAm\_on\_Smoking\_in\_All\_3\_Models**

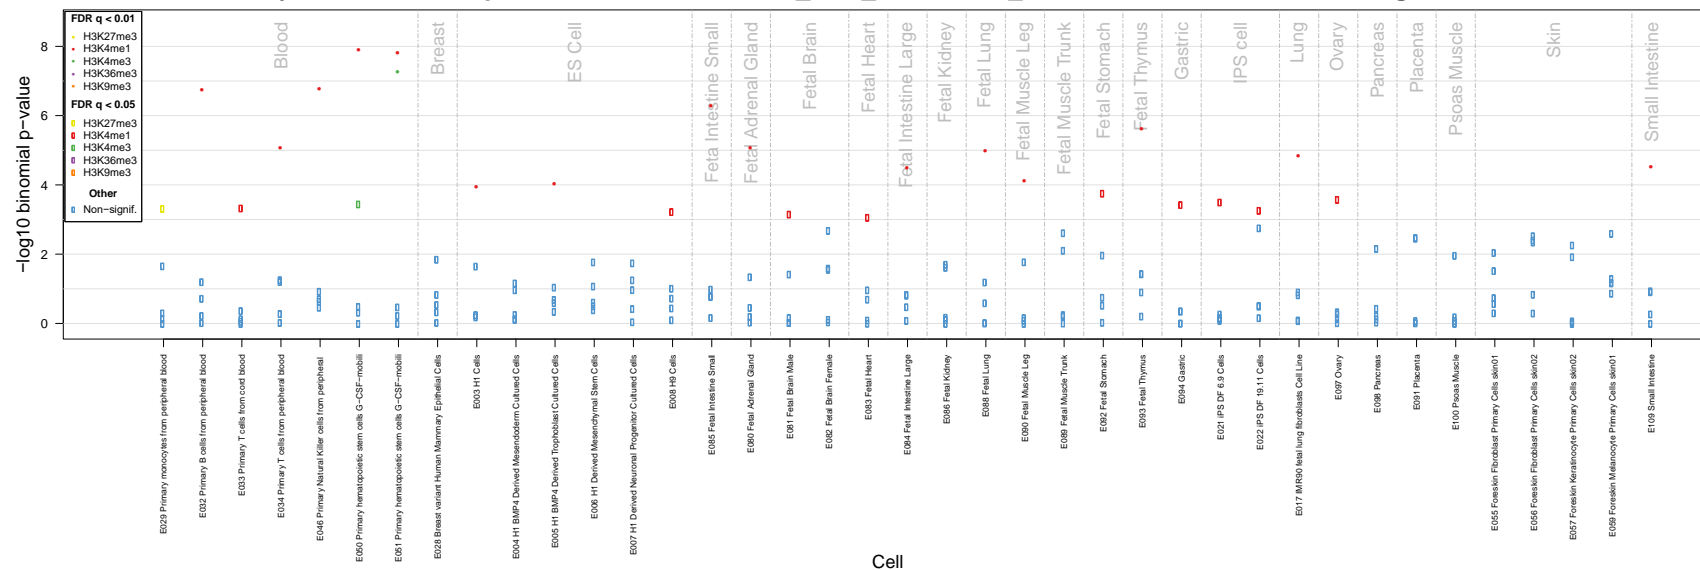

284  
285  
286  
287

*Note.* Please refer to **Supplementary Table S13** for the corresponding data.

288  
289

**Figure S20**

*eFORGE analyses of overlap between DNase hypersensitivity (DHS) sites and the 64 CpGs with potential DNAm → Current Smoking effects*

**DMPs analyzed across samples for erc2-DHS Sites\_with\_Consistent\_Effects\_of\_DNAm\_on\_Smoking\_in\_All\_3\_Models**

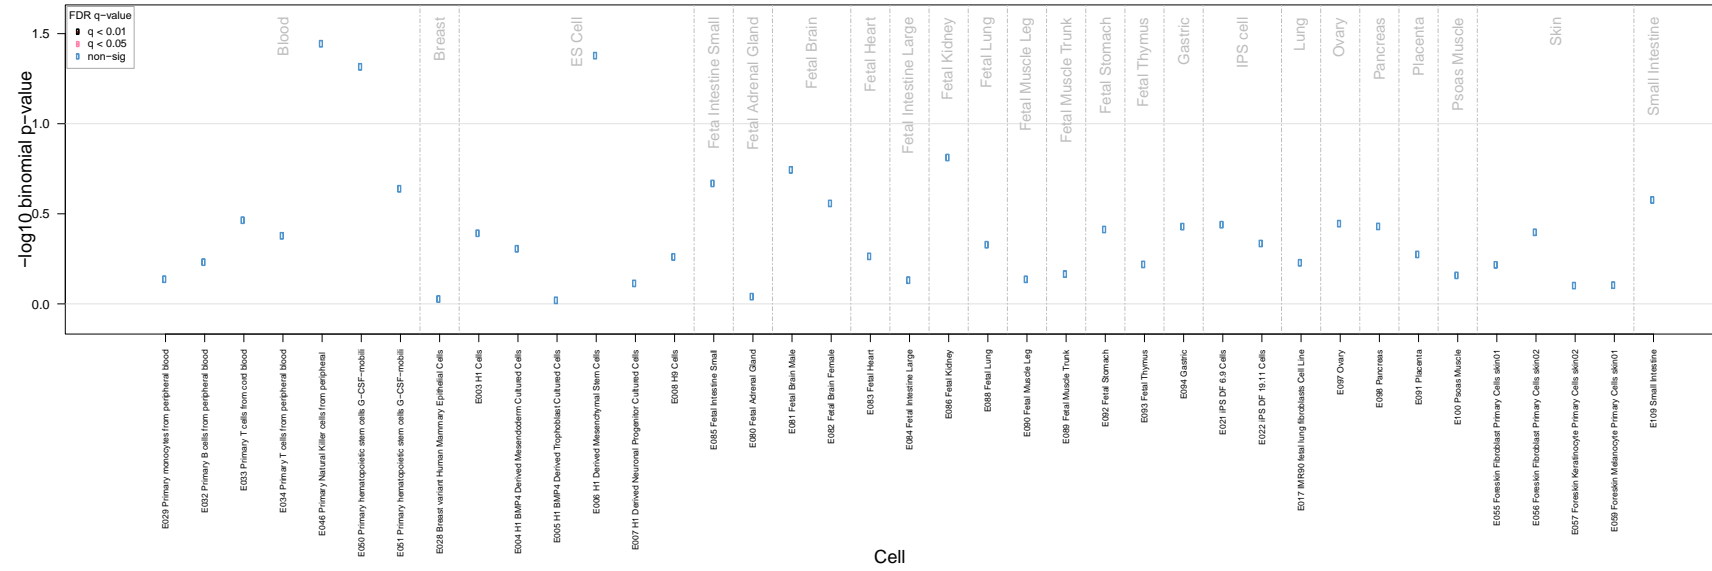

290  
291  
292  
293  
294

*Note.* Please refer to **Supplementary Table S14** for the corresponding data.





303  
304  
305

**Figure S22**

Follow-up eFORGE analyses of overlap between histone-mark modifications and the 21 CpGs enriched for overlap with Enhancers in the “Fetal Brain Male” sample in Figure S10/Table S5

**DMPs analyzed across samples for erc2-H3-all CpGs\_Enriched\_for\_Fetal\_Brain\_Enhancers\_and\_Effects\_on\_Smoking**

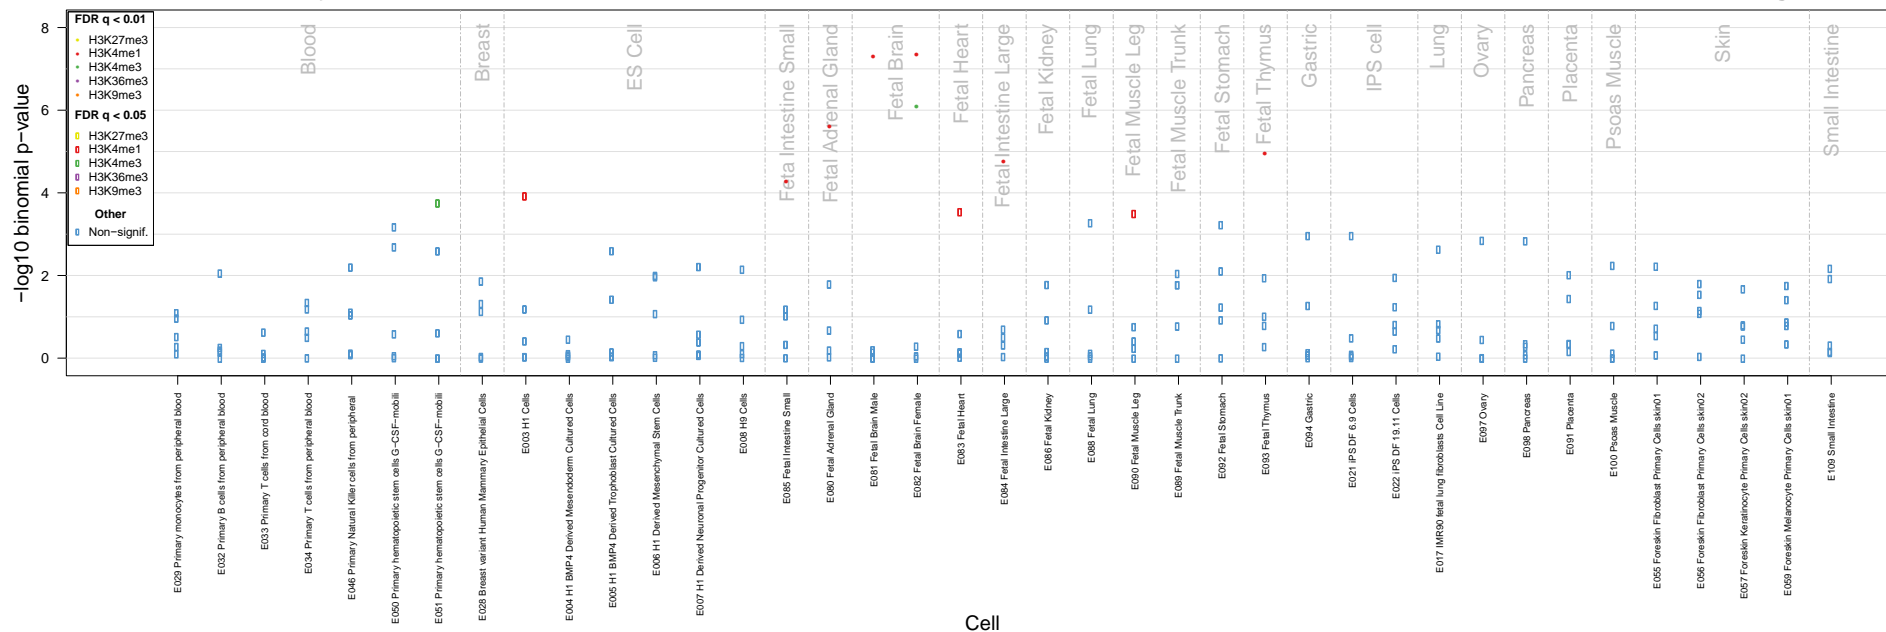

306  
307  
308  
309  
310

Note. Please refer to **Supplementary Table S16** for the corresponding data.

311  
312  
313

**Figure S23**

Follow-up eFORGE analyses of overlap between DNase hypersensitivity (DHS) sites and the 21 CpGs enriched for overlap with Enhancers in the “Fetal Brain Male” sample in Figure S10/Table S5

**DMPs analyzed across samples for erc2-DHS CpGs\_Enriched\_for\_Fetal\_Brain\_Enhancers\_and\_Effects\_on\_Smoking**

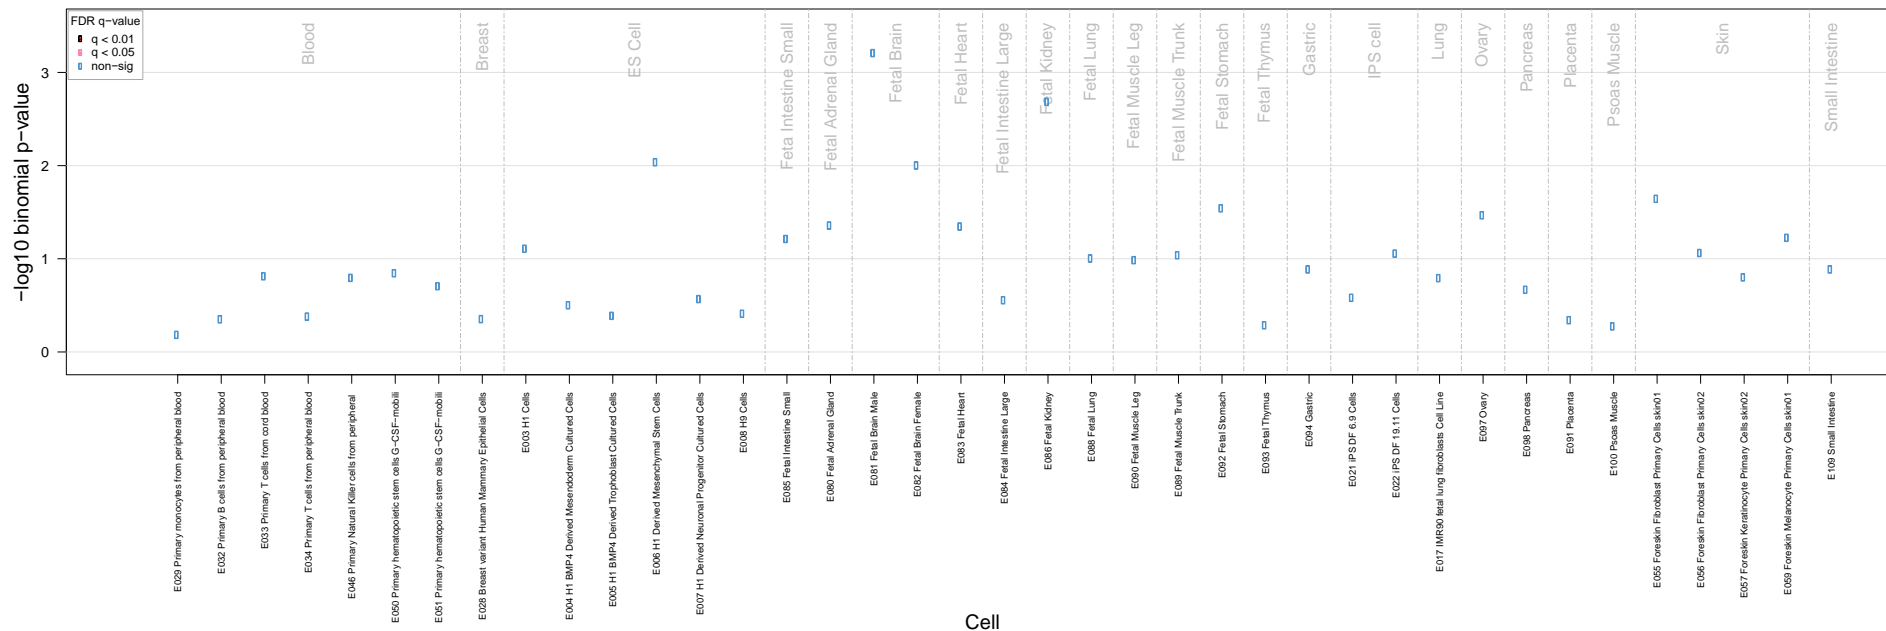

314  
315  
316  
317  
318

Note. Please refer to **Supplementary Table S17** for the corresponding data.

319  
320  
321

**Figure S24**

Follow-up eFORGE analyses of overlap between DNase hypersensitivity (DHS) sites and the 17 CpGs enriched for overlap with H3K4me3 modifications in the “Fetal Brain Female” samples in Supplementary Figure S14/Table S9

**DMPs analyzed across samples for erc2–DHS CpGs\_Enriched\_for\_Fetal\_Brain\_H3K4me3\_and\_Effects\_on\_Smoking**

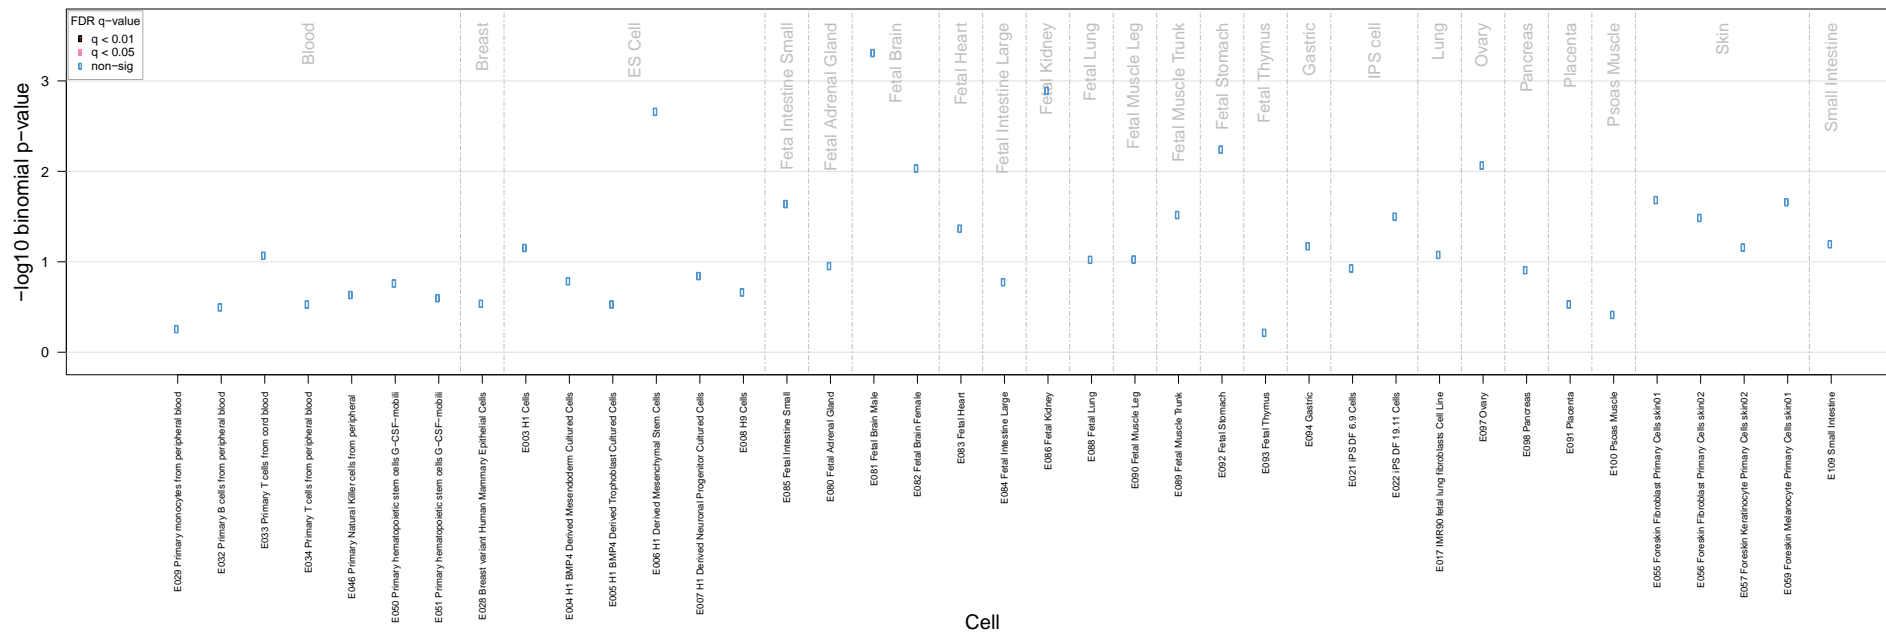

322  
323  
324

Note. Please refer to **Supplementary Table S20** for the corresponding data.

**Figure S25**

*Estimated DNAm → Current Smoking effects at the 17 CpGs showing highly specific enrichment for overlap with gene-regulatory elements in the brain in Figure 7*

Estimated Effects of DNAm on Current Smoking  
At 17 CpGs Showing Enrichment for Functional Elements in the Brain

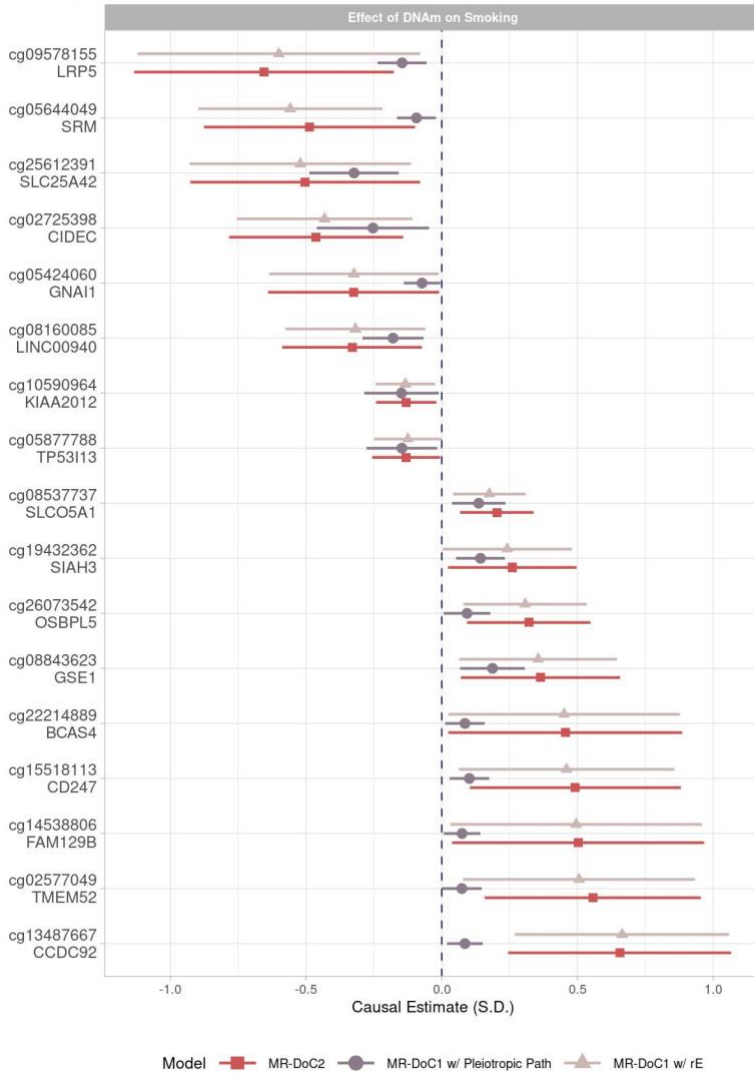

*Note.* The Y-axis shows the probe ID and the “Nearest Gene”. For the corresponding data, please refer to **Supplementary Table S3**.

333  
334  
335

### Figure S26

*e*FORGE analyses of overlap between gene-regulatory chromatin states and the 18 CpGs underlying the enriched overlap with Enhancers in the “Lung” sample in Figure S10/Table S5

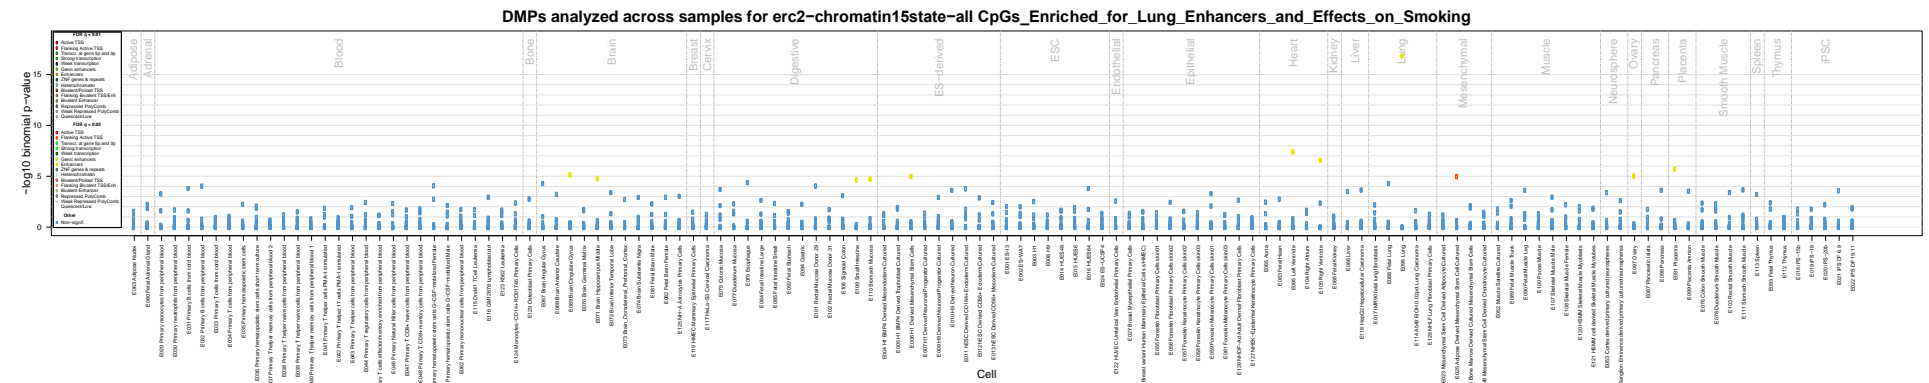

336  
337  
338  
339  
340

Note. Please refer to **Supplementary Table S21** for the corresponding data.

341  
342  
343  
344

**Figure S27**

*eFORGE analyses of overlap between histone-mark modifications and the 18 CpGs underlying the enriched overlap with Enhancers in the “Lung” sample in Figure S10/Table S5*

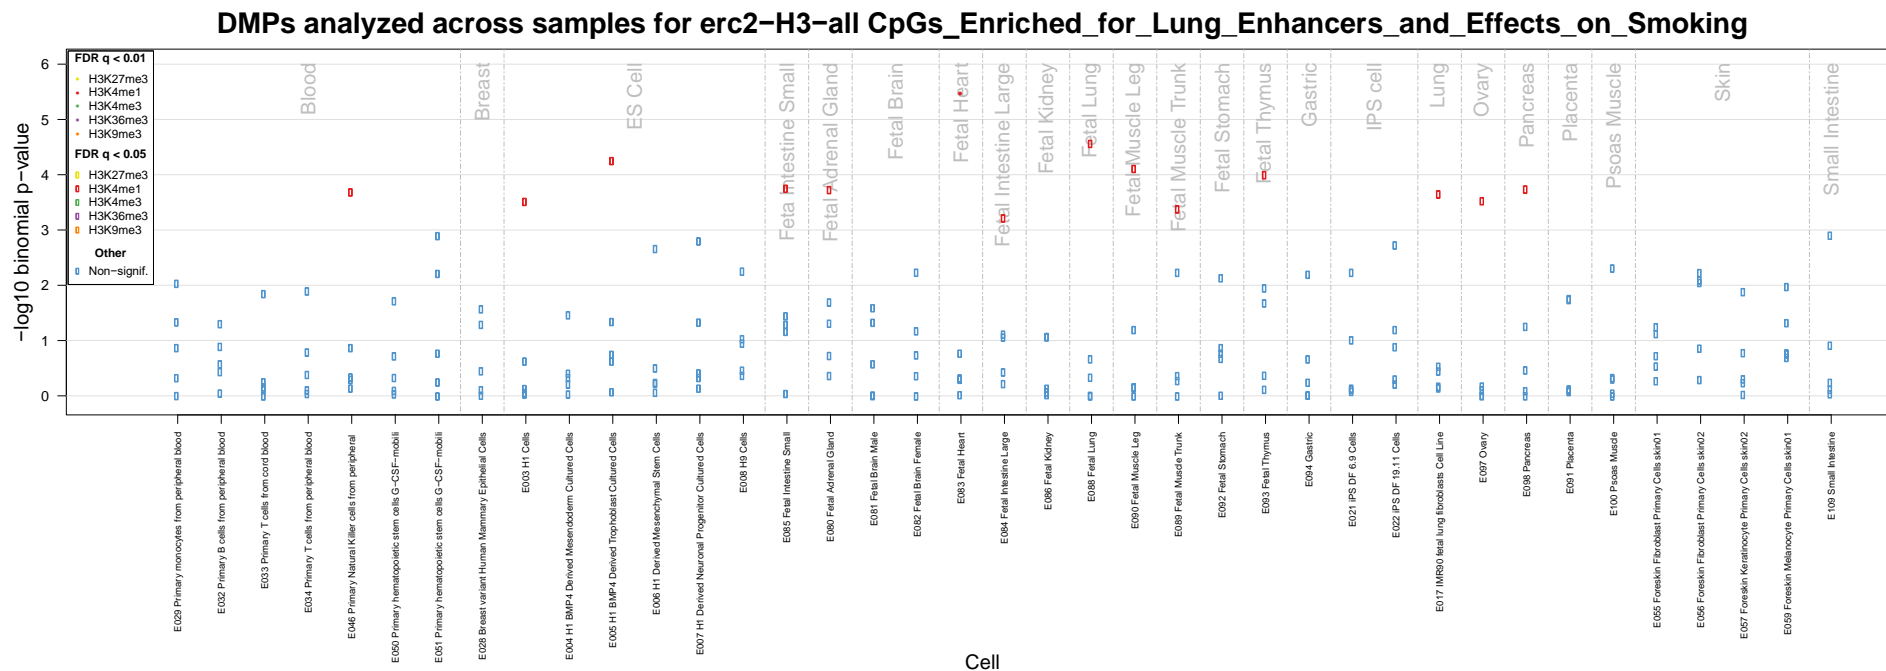

345  
346  
347

*Note.* Please refer to **Supplementary Table S22** for the corresponding data.

348  
349  
350  
351

**Figure S28**

*eFORGE analyses of overlap between DNase hypersensitivity (DHS) sites and the 18 CpGs underlying the enriched overlap with Enhancers in the “Lung” sample in Figure S10/Table S5*

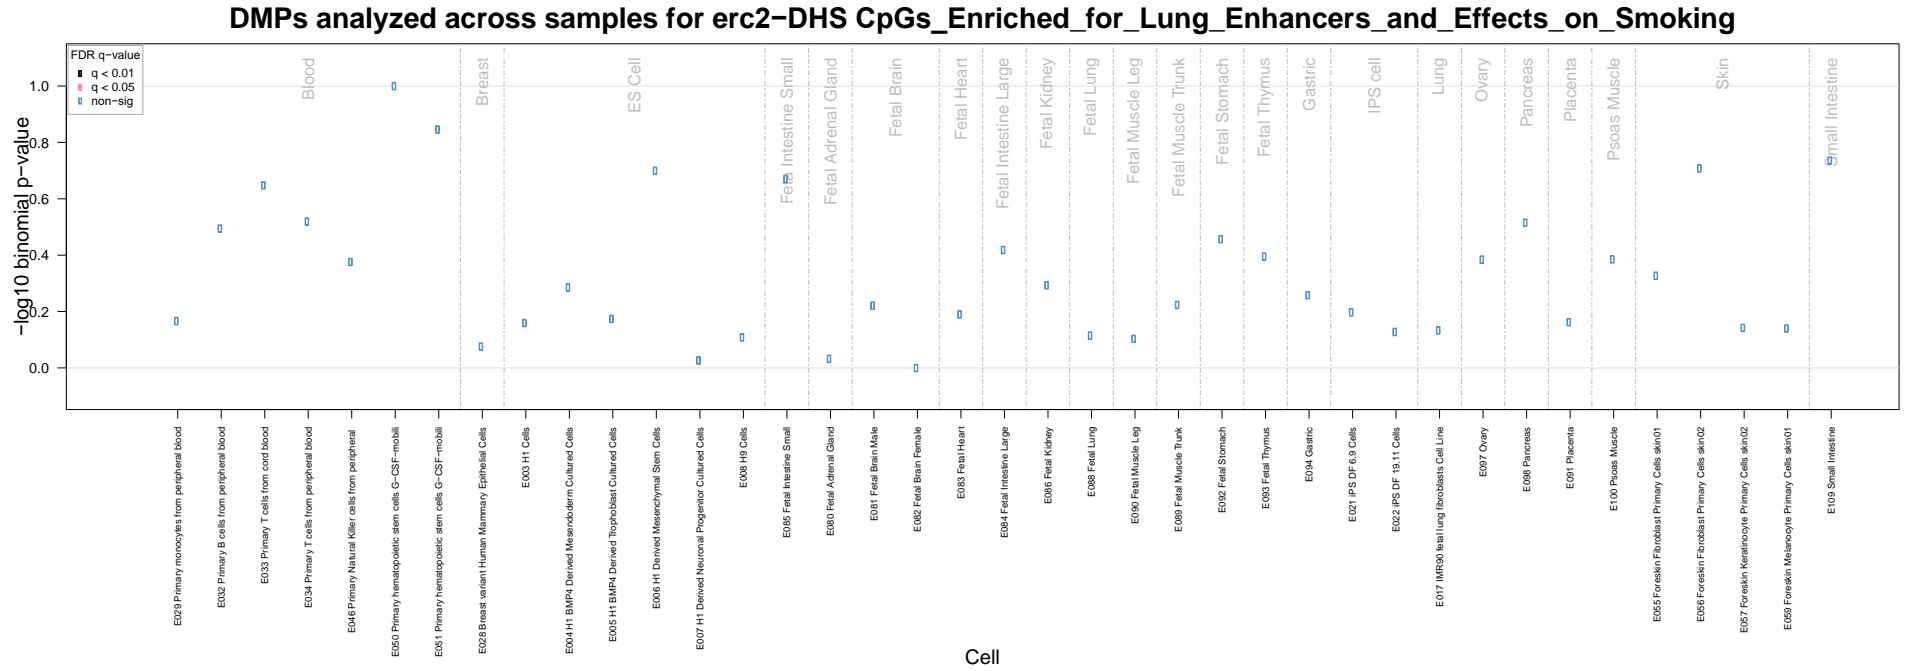

352  
353  
354  
355  
356  
357

*Note.* Please refer to **Supplementary Table S23** for the corresponding data.

358  
359  
360

### Figure S29

*e*FORGE analyses of overlap between gene-regulatory chromatin states and the 18 CpGs underlying the enriched overlap with Enhancers in the “Primary B cells from cord blood” sample in Figure S10/Table S5

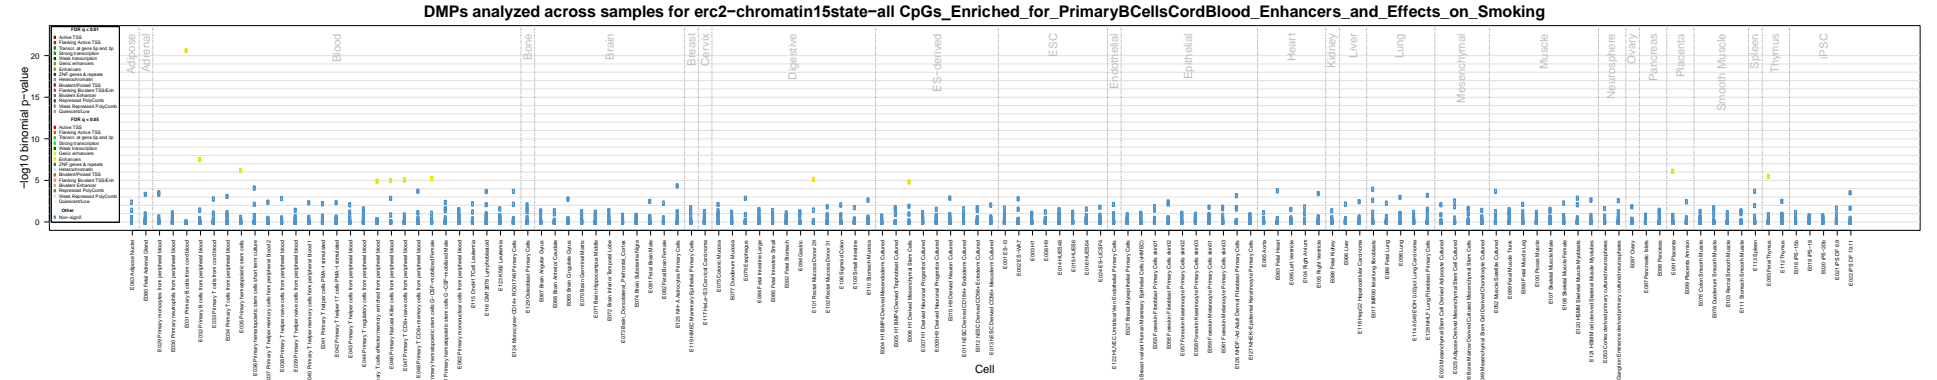

361  
362  
363  
364  
365

Note. Please refer to **Supplementary Table S24** for the corresponding data.



366

367

### Figure S30

368

*eFORGE* analyses of overlap between histone-mark modifications and the 18 CpGs underlying the enriched overlap with Enhancers in the “Primary B cells from cord blood” sample in Figure S10/Table S5

369

#### DMPs analyzed across samples for erc2-H3-all CpGs\_Enriched\_for\_PrimaryBCellsCordBlood\_Enhancers\_and\_Effects\_on\_Smoking

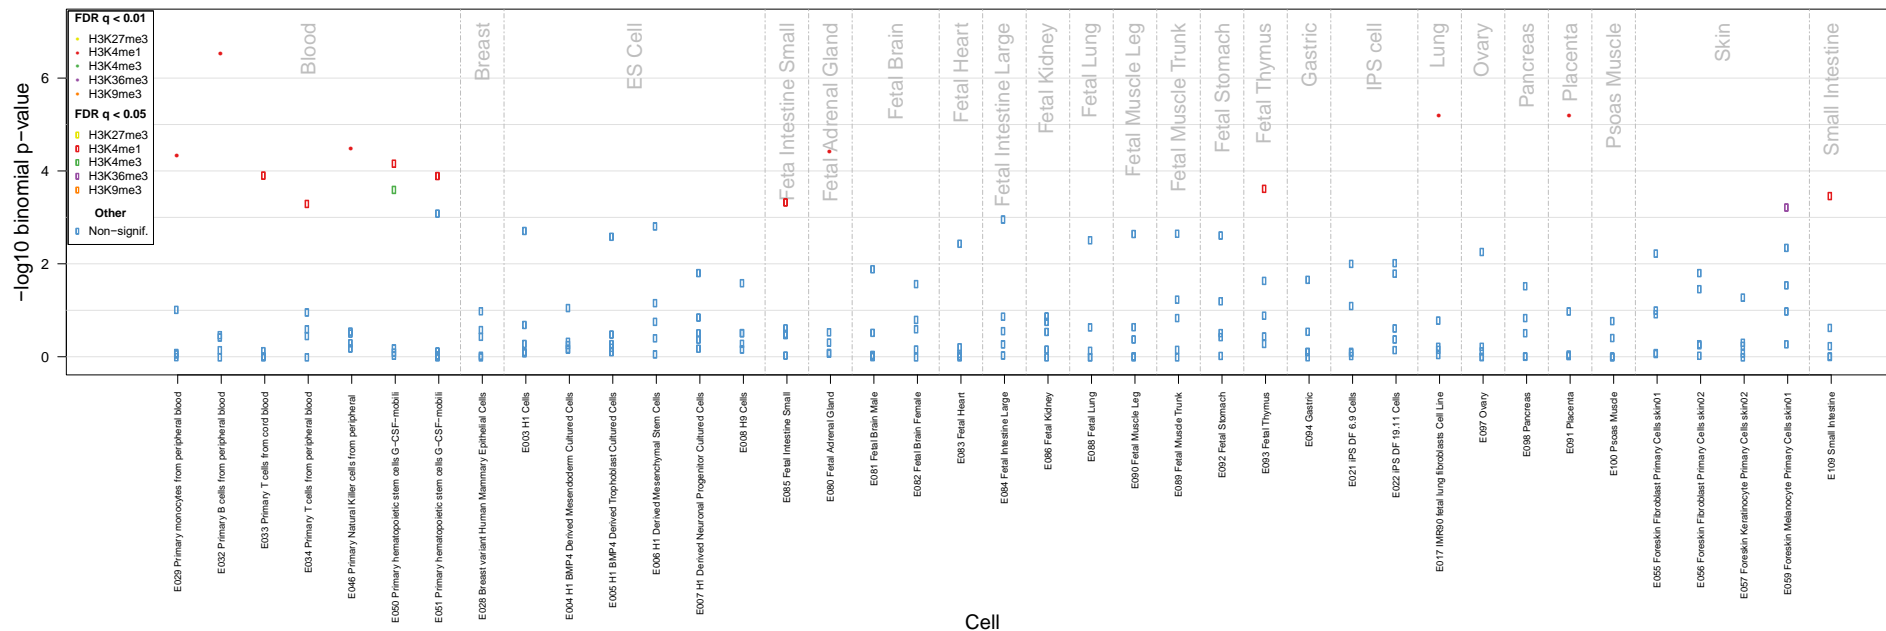

370

371

Note. Please refer to **Supplementary Table S25** for the corresponding data.

372

373

374

375

376

377  
378  
379  
380

**Figure S31**

*eFORGE analyses of overlap between DNase hypersensitivity (DHS) sites and the 18 CpGs underlying the enriched overlap with Enhancers in the “Primary B cells from cord blood” sample in Figure S10/Table S5*

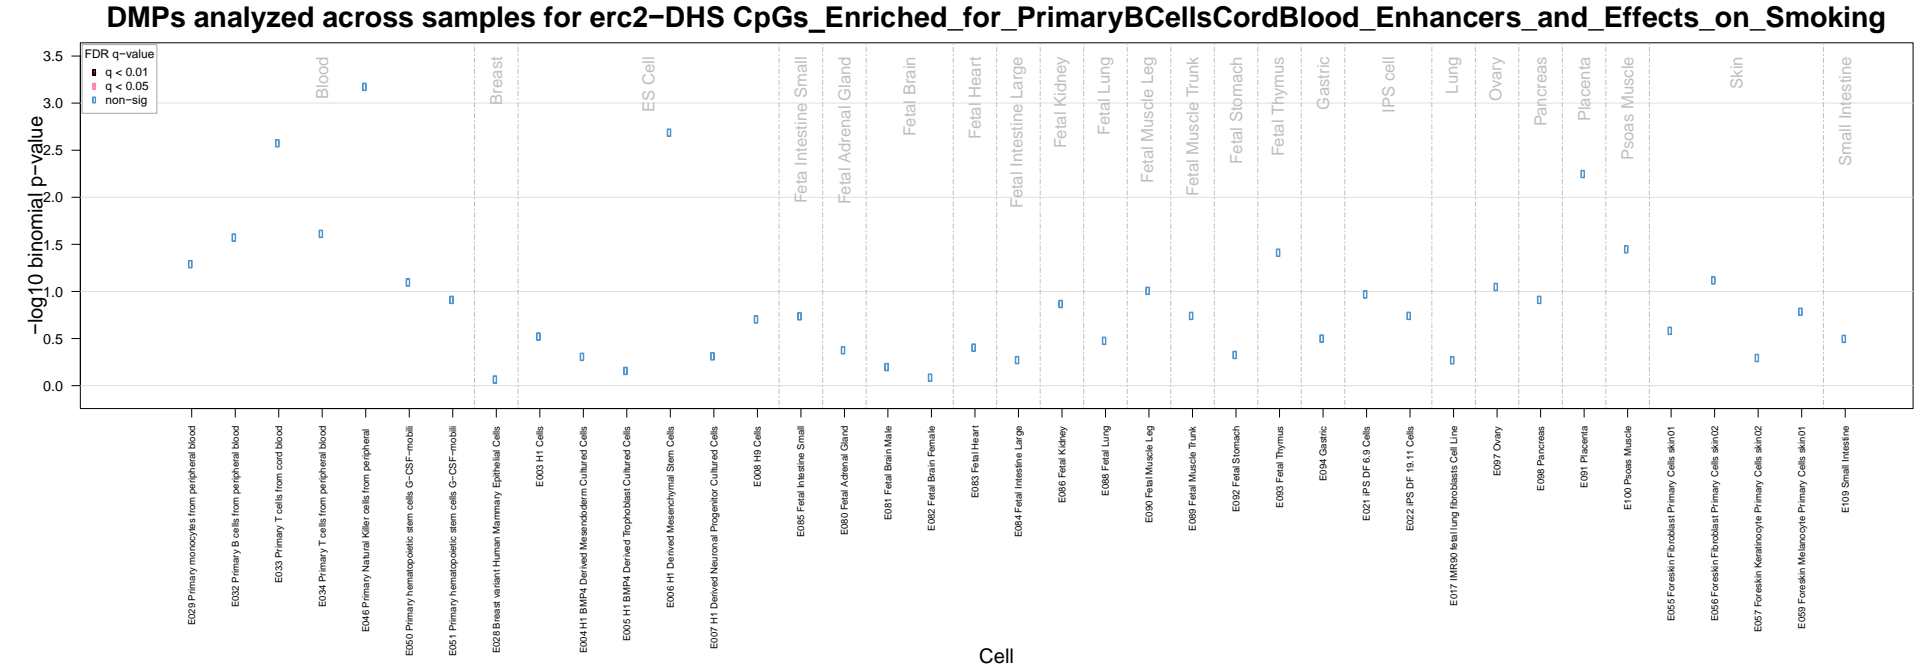

381  
382  
383  
384  
385

*Note.* Please refer to **Supplementary Table S26** for the corresponding data.

386 **Figure S32**

387 *Upset plot of the intersection of CpGs with statistically significant (FDR <0.05) Former Smoking → DNAm effects in*  
 388 *each of the three MR-DoC models*

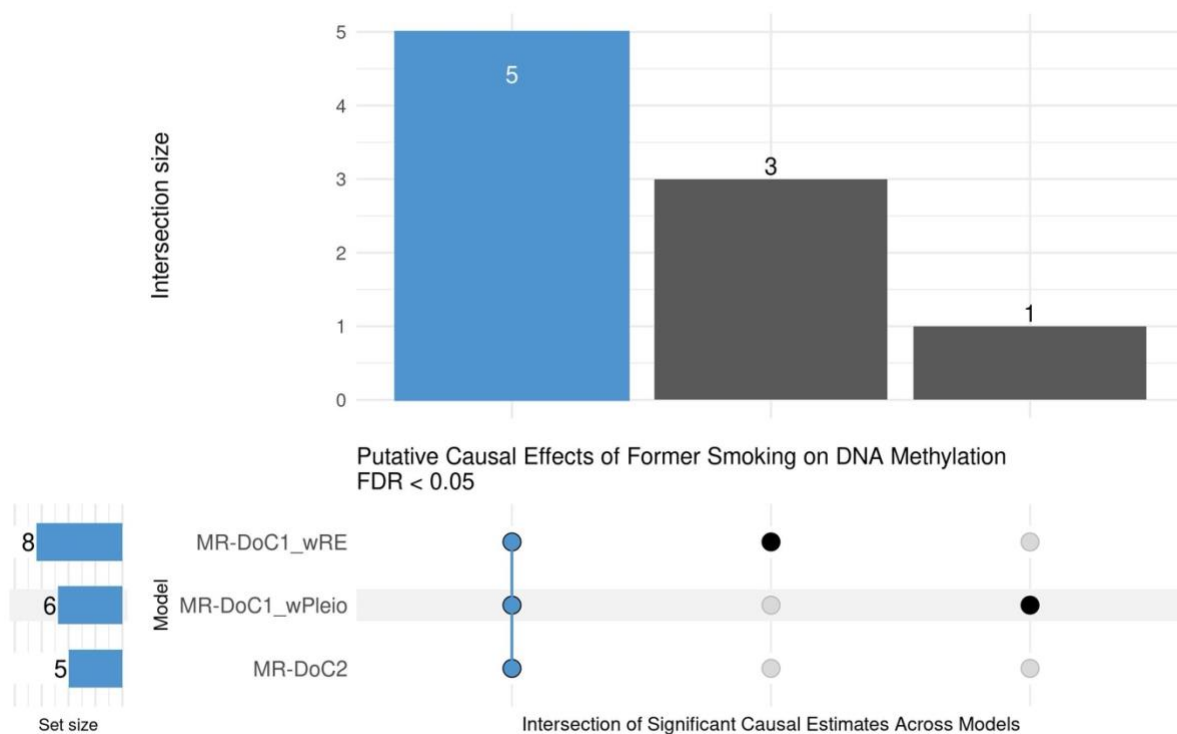

389  
390

391 *Note.* Please refer to **Supplementary Table S27** for the corresponding data.

392  
393  
394

395

**Figure S33**

396

Upset plot of the intersection of CpGs with statistically significant ( $FDR < 0.05$ ) DNAm  $\rightarrow$  Former Smoking effects in each of the three MR-DoC models

397

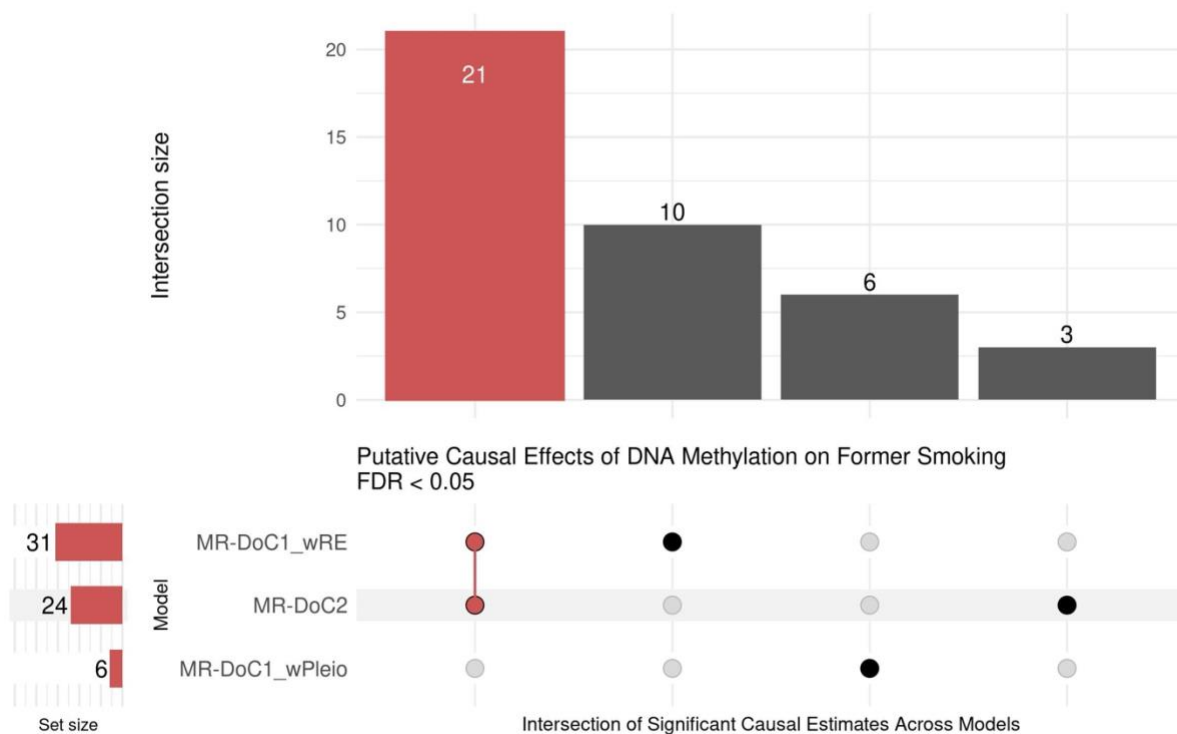

398

399

400

Note. Please refer to **Supplementary Table S29** for the corresponding data.

401

402

403  
404  
405  
406

### Figure S34

Estimated DNAm → Former Smoking effects at the two former-smoking-associated CpGs that showed robust evidence of DNAm → Current Smoking effects

Putative Effects of DNA Methylation on Current Smoking Compared to the Estimated Effects on Former Smoking

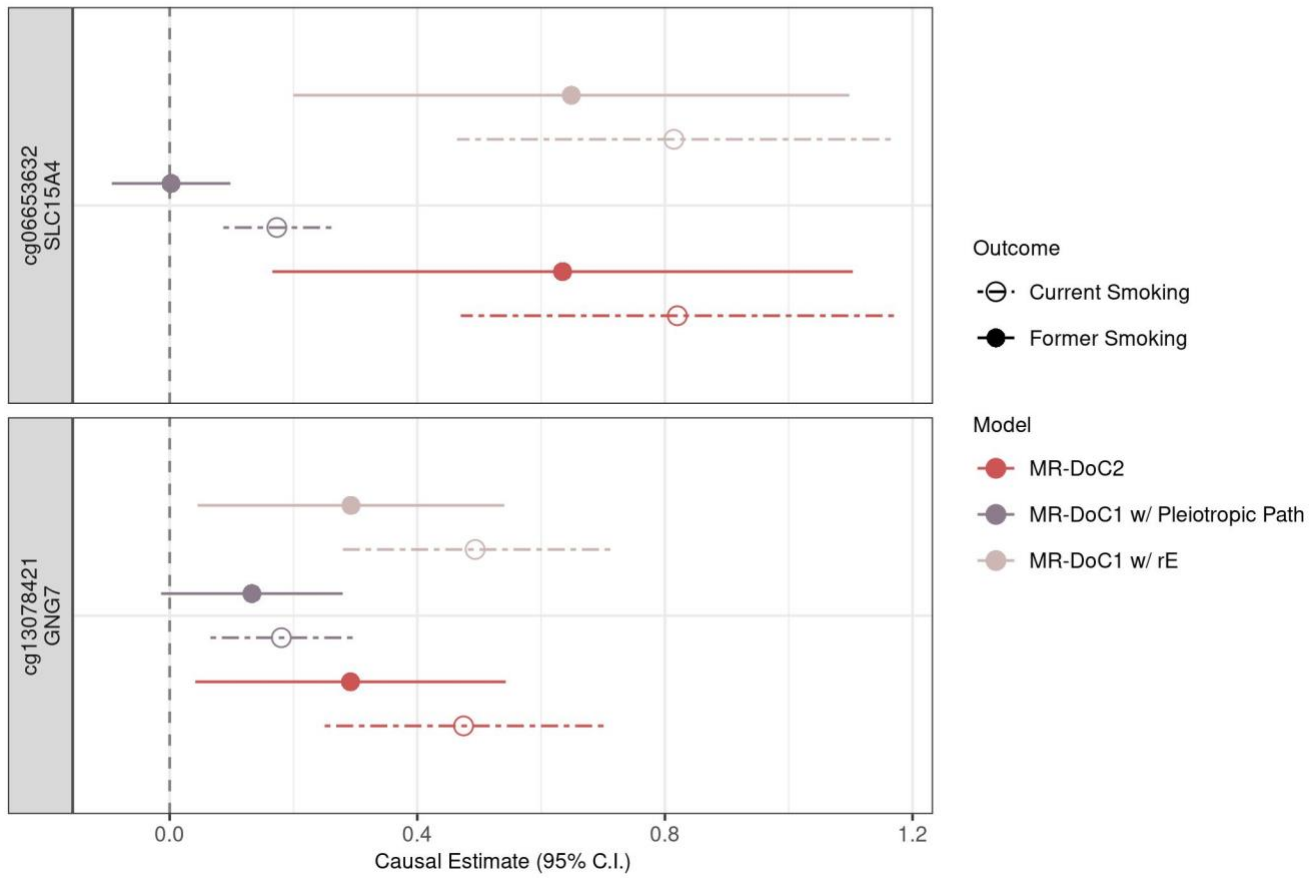

407  
408  
409  
410  
411

Note. Please refer to **Supplementary Tables S3 and S29** for the corresponding data.

412  
413  
414  
415

### Figure S35

Prior EWAS association statistics of smoking-associated CpGs stratified by whether the CpG was identified as having an mQTL allelic score with  $F$ -statistic  $>10$  in the current study

EWAS Meta-Analysis Association Statistics of Smoking-Associated CpGs  
With and Without an mQTL Allelic Score with  $F$ -statistic  $>10$

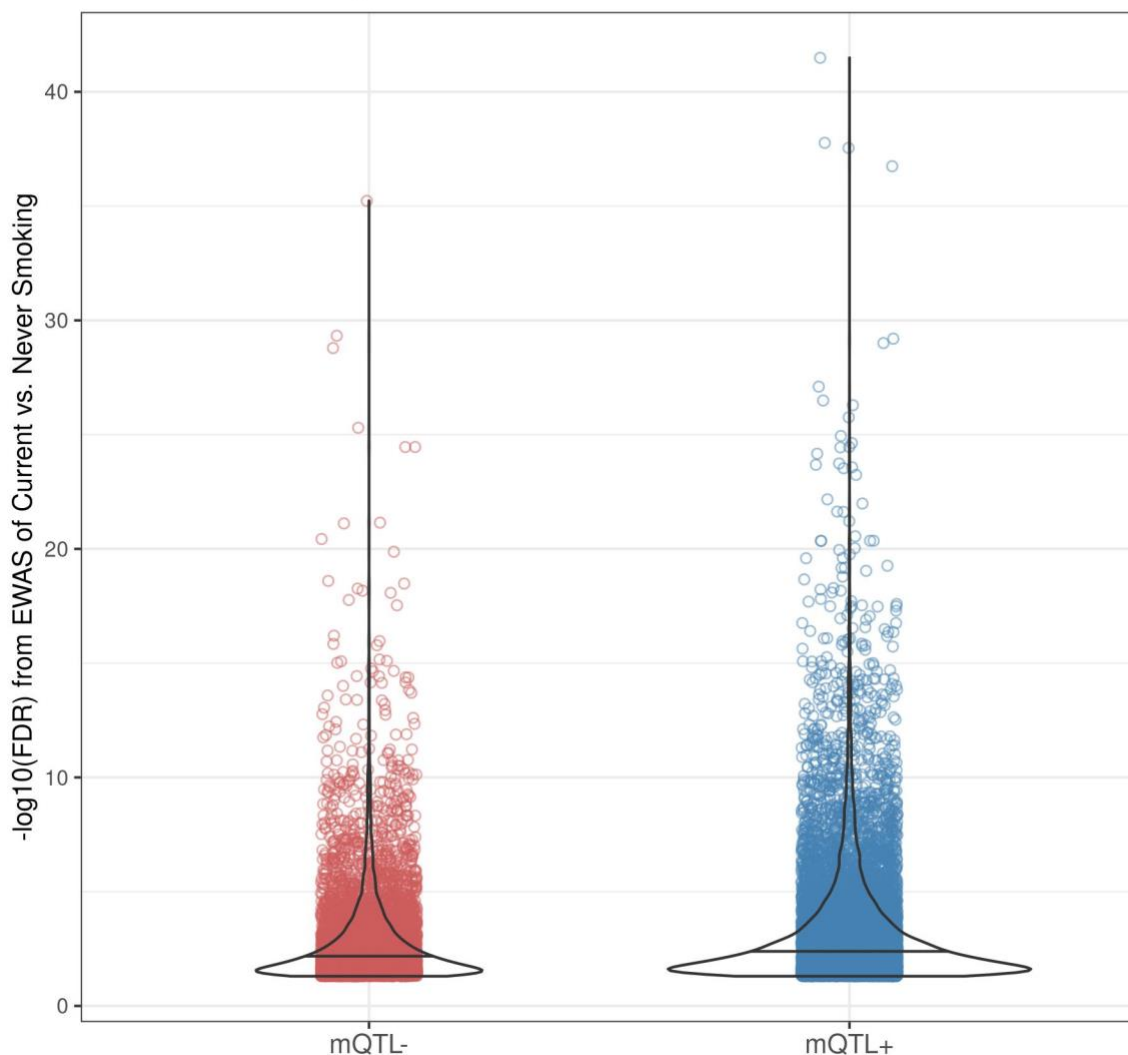

416  
417  
418  
419  
420  
421

On the X-axis, “mQTL-” indicates the CpGs without an mQTL allelic score with  $F >10$  (5,816 CpGs), and “mQTL+” indicates the CpGs with an mQTL allelic score with  $F >10$  (11,124 CpGs). The Y-axis shows the  $-\log_{10}(\text{FDR})$  values of the association results from the previous EWAS meta-analysis of current vs. never smoking<sup>13</sup>. The “mQTL-” CpGs were not tested for DNAm  $\rightarrow$  Smoking causal effects in the current study.

422 **References**

- 423 1. Ligthart, L. *et al.* The Netherlands Twin Register: Longitudinal Research Based on Twin and Twin-  
424 Family Designs. *Twin Research and Human Genetics* **22**, 623–636 (2019).
- 425 2. Minică, C. C., Dolan, C. V., Boomsma, D. I., De Geus, E. & Neale, M. C. Extending Causality Tests  
426 with Genetic Instruments: An Integration of Mendelian Randomization with the Classical Twin  
427 Design. *Behavior Genetics* **48**, 337–349 (2018).
- 428 3. Castro-de-Araujo, L. F. S. *et al.* MR-DoC2: Bidirectional Causal Modeling with Instrumental  
429 Variables and Data from Relatives. *Behavior Genetics* **53**, 63–73 (2023).
- 430 4. Singh, M. *et al.* Using Instrumental Variables to Measure Causation over Time in Cross-Lagged Panel  
431 Models. *Multivariate Behavioral Research* **59**, 342–370 (2024).
- 432 5. Auton, A. *et al.* A global reference for human genetic variation. *Nature* **526**, 68–74 (2015).
- 433 6. Haplotype Reference Consortium. A reference panel of 64,976 haplotypes for genotype imputation.  
434 *Nature Genetics* **48**, 1279–1283 (2016).
- 435 7. Francioli, L. C. *et al.* Whole-genome sequence variation, population structure and demographic history  
436 of the Dutch population. *Nature Genetics* **46**, 818–825 (2014).
- 437 8. Price, A. L. *et al.* Principal components analysis corrects for stratification in genome-wide association  
438 studies. *Nature Genetics* **38**, 904–909 (2006).
- 439 9. Saunders, G. R. B. *et al.* Genetic diversity fuels gene discovery for tobacco and alcohol use. *Nature*  
440 **612**, 720–724 (2022).
- 441 10. Vilhjálmsón, J. *et al.* Modeling Linkage Disequilibrium Increases Accuracy of Polygenic Risk  
442 Scores. *The American Journal of Human Genetics* **97**, 576–592 (2015).
- 443 11. Breeze, C. E. *et al.* eFORGE: A Tool for Identifying Cell Type-Specific Signal in Epigenomic  
444 Data. *Cell Reports* **17**, 2137–2150 (2016).
- 445 12. Zhou, Y. *et al.* Metascape provides a biologist-oriented resource for the analysis of systems-level  
446 datasets. *Nature Communications* **10**, (2019).
- 447 13. Joehanes, R. *et al.* Epigenetic Signatures of Cigarette Smoking. *Circulation. Cardiovascular*  
448 *genetics* **9**, 436–447 (2016).

449  
450
